# Supplementary material for: TwinCons: Conservation score for uncovering deep sequence similarity and divergence
Source: PubMed Central journal article supplement (PMC8580257; doi:10.1371/journal.pcbi.1009541), 2021-10-29

# TwinCons S2 Dataset

This dataset is a PDF generated with code available at <https://github.com/LDWLab/TwinCons> .

Each page of the PDF shows parameter testing of classifiers based on two datasets (BBS and PRST) against 4 datasets (BBS, PRST, rProt, and IND), excluding self-testing (e.g. BBS vs BBS).

Complete description of the datasets and parameters is available in the main manuscript text.

Titles indicate which is the dataset used for training and which is the dataset used for testing, separated by a dash.

The titles end with a descriptor for the general parameters used:

Cumulative - SVM classifiers, segments are created based on cumulative scoring by varying the window smoothing;

Old segment - SVM classifiers, segments are created based on intensity and length thresholds;

Trees - Random forest classifiers, segments are created based on cumulative scoring by varying the window smoothing.

For example, BBS-IND Cumulative shows parameters searched for classifier trained on BBS, tested against IND and using the cumulative segment creation rule.

Page to title index:

|    |                         |
|----|-------------------------|
| 2  | BBS-IND Cumulative      |
| 3  | BBS-IND Old segments    |
| 4  | BBS-IND Trees           |
| 5  | BBS-PRST Cumulative     |
| 6  | BBS-PRST Old segments   |
| 7  | BBS-PRST Trees          |
| 8  | BBS-rProt Cumulative    |
| 9  | BBS-rProt Old segments  |
| 10 | BBS-rProt Trees         |
| 11 | PRST-BBS Cumulative     |
| 12 | PRST-BBS Old segments   |
| 13 | PRST-BBS Trees          |
| 14 | PRST-IND Cumulative     |
| 15 | PRST-IND Old segments   |
| 16 | PRST-IND Trees          |
| 17 | PRST-rProt Cumulative   |
| 18 | PRST-rProt Old segments |
| 19 | PRST-rProt Trees        |

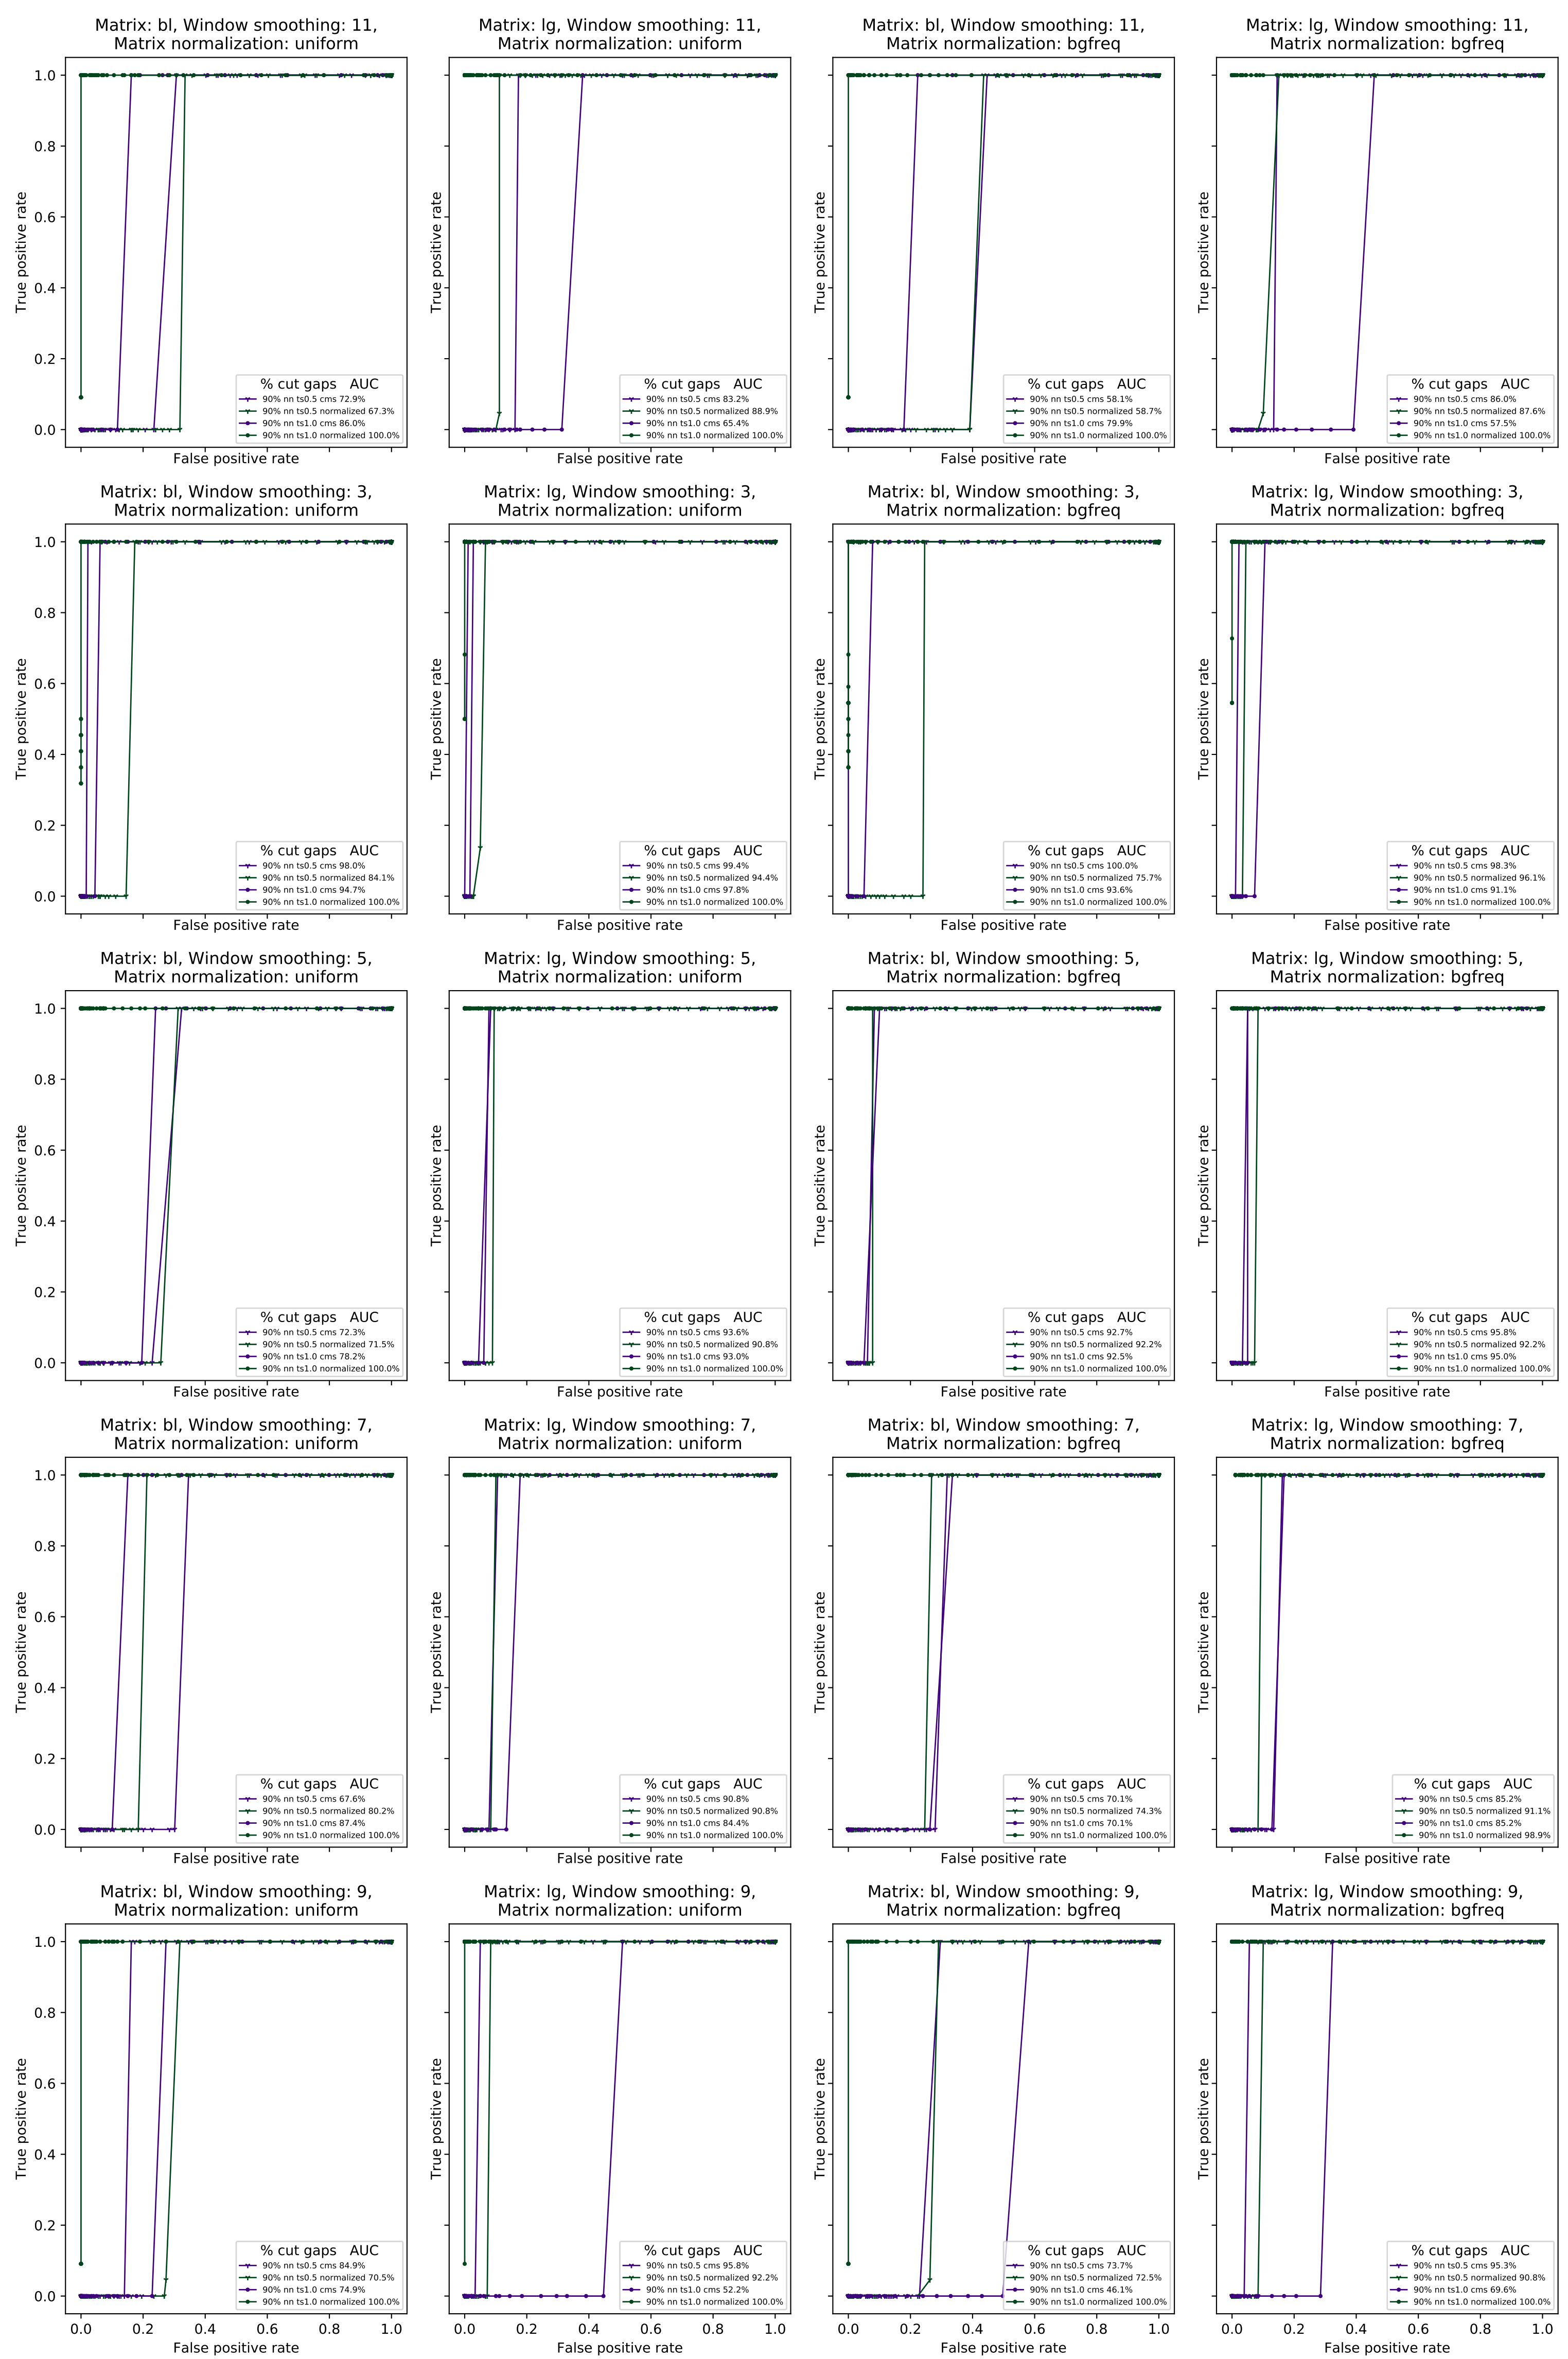

Matrix: bl, Length thr: It2, Weighted: pairW, Intensity thr: it1

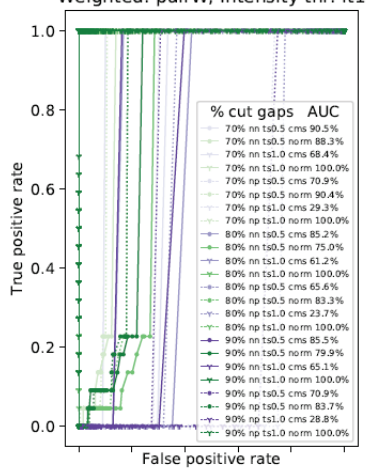

Matrix: bl, Length thr: It2, Weighted: pairW, Intensity thr: it2

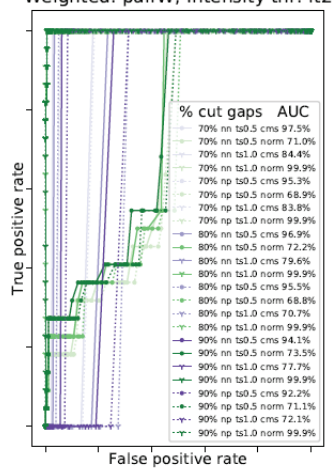

Matrix: bl, Length thr: It2, Weighted: unW, Intensity thr: it1

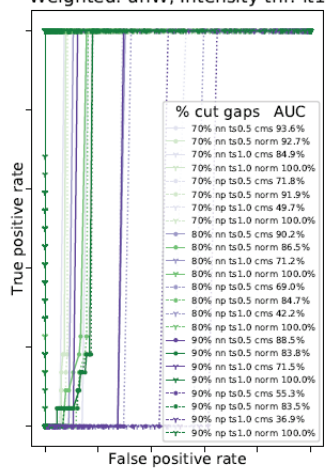

Matrix: bl, Length thr: It2, Weighted: unW, Intensity thr: it2

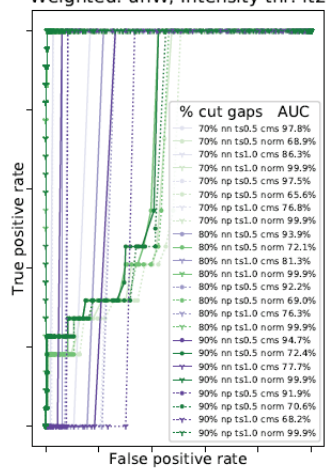

Matrix: bl, Length thr: It3, Weighted: pairW, Intensity thr: it1

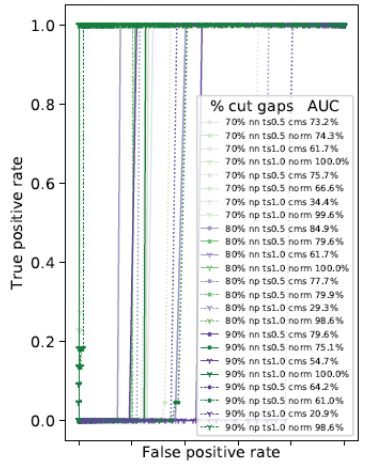

Matrix: bl, Length thr: It3, Weighted: pairW, Intensity thr: it2

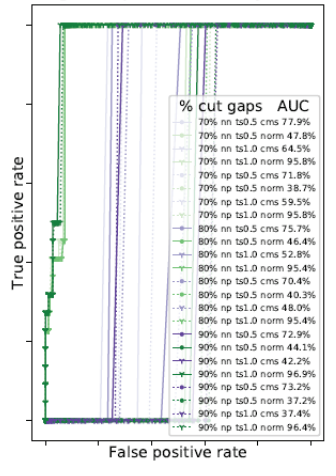

Matrix: bl, Length thr: It3, Weighted: unW, Intensity thr: it1

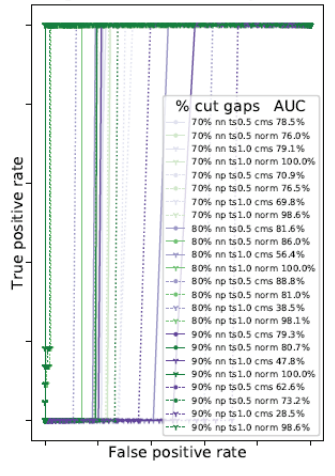

Matrix: bl, Length thr: It3, Weighted: unW, Intensity thr: it2

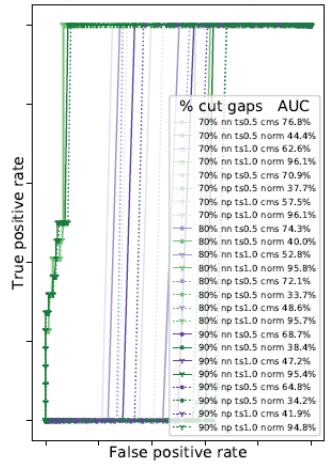

Matrix: lg, Length thr: It2, Weighted: pairW, Intensity thr: it1

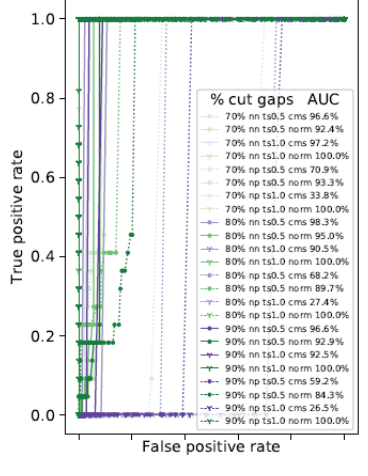

Matrix: lg, Length thr: It2, Weighted: pairW, Intensity thr: it2

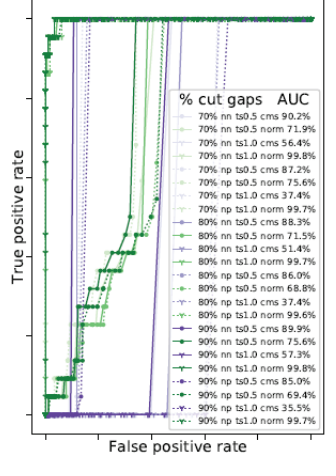

Matrix: lg, Length thr: It2, Weighted: unW, Intensity thr: it1

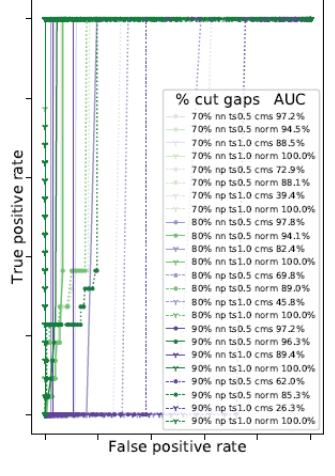

Matrix: lg, Length thr: It2, Weighted: unW, Intensity thr: it2

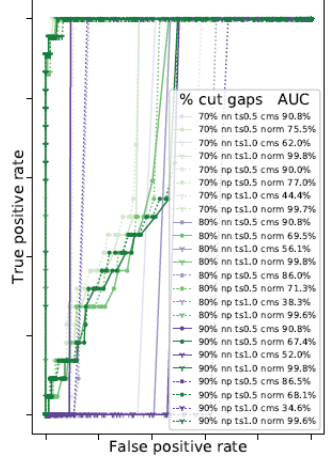

Matrix: lg, Length thr: It3, Weighted: pairW, Intensity thr: it1

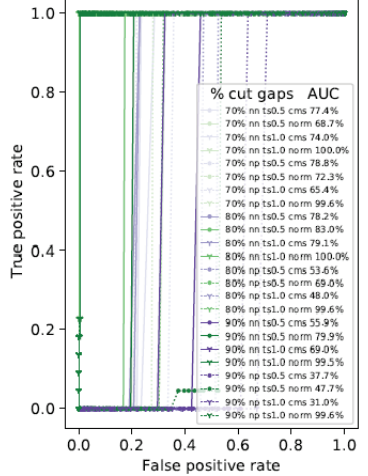

Matrix: lg, Length thr: It3, Weighted: pairW, Intensity thr: it2

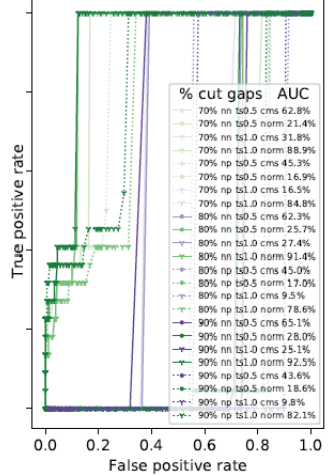

Matrix: lg, Length thr: It3, Weighted: unW, Intensity thr: it1

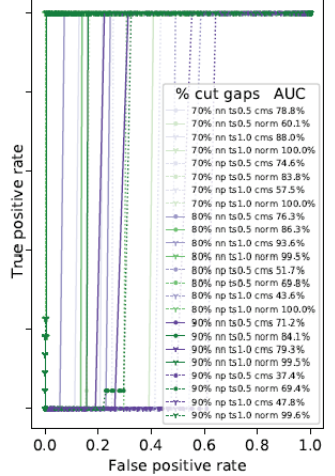

Matrix: lg, Length thr: It3, Weighted: unW, Intensity thr: it2

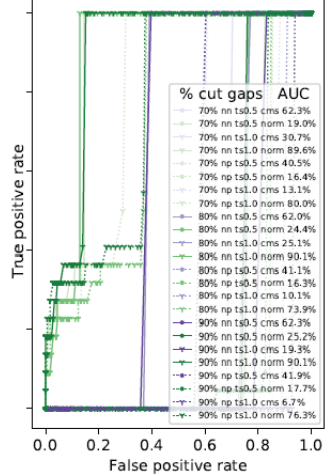



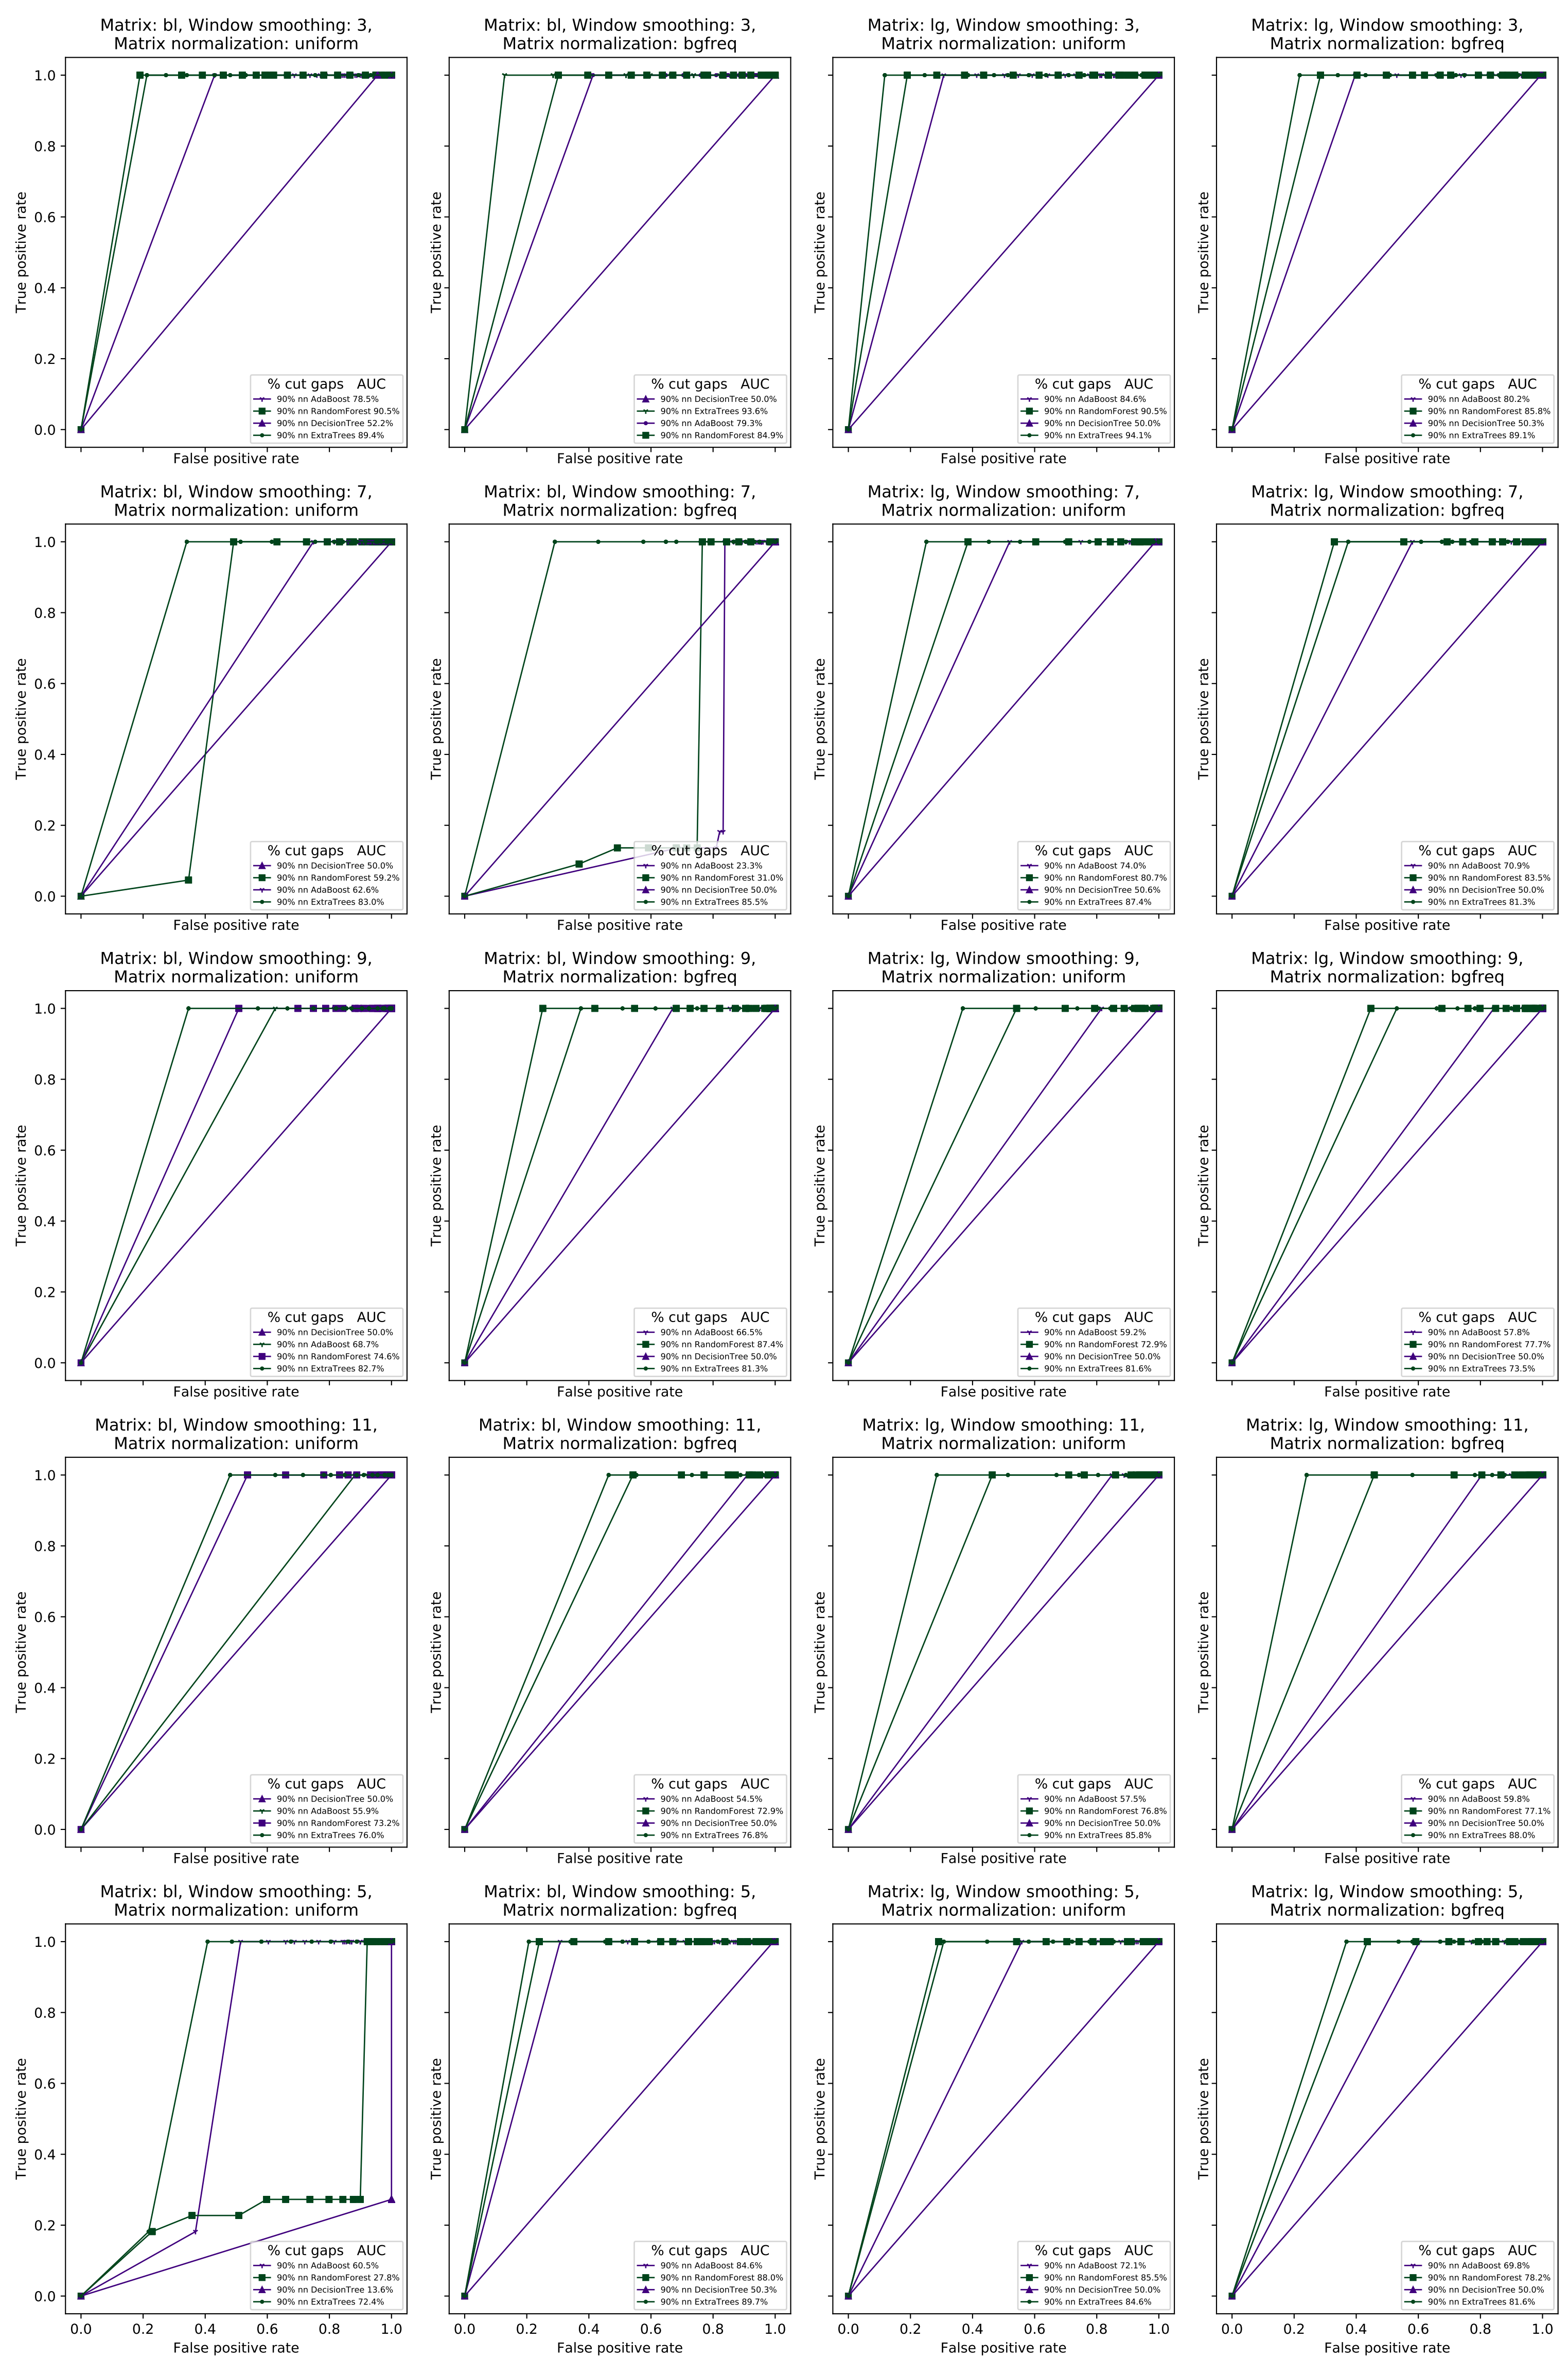

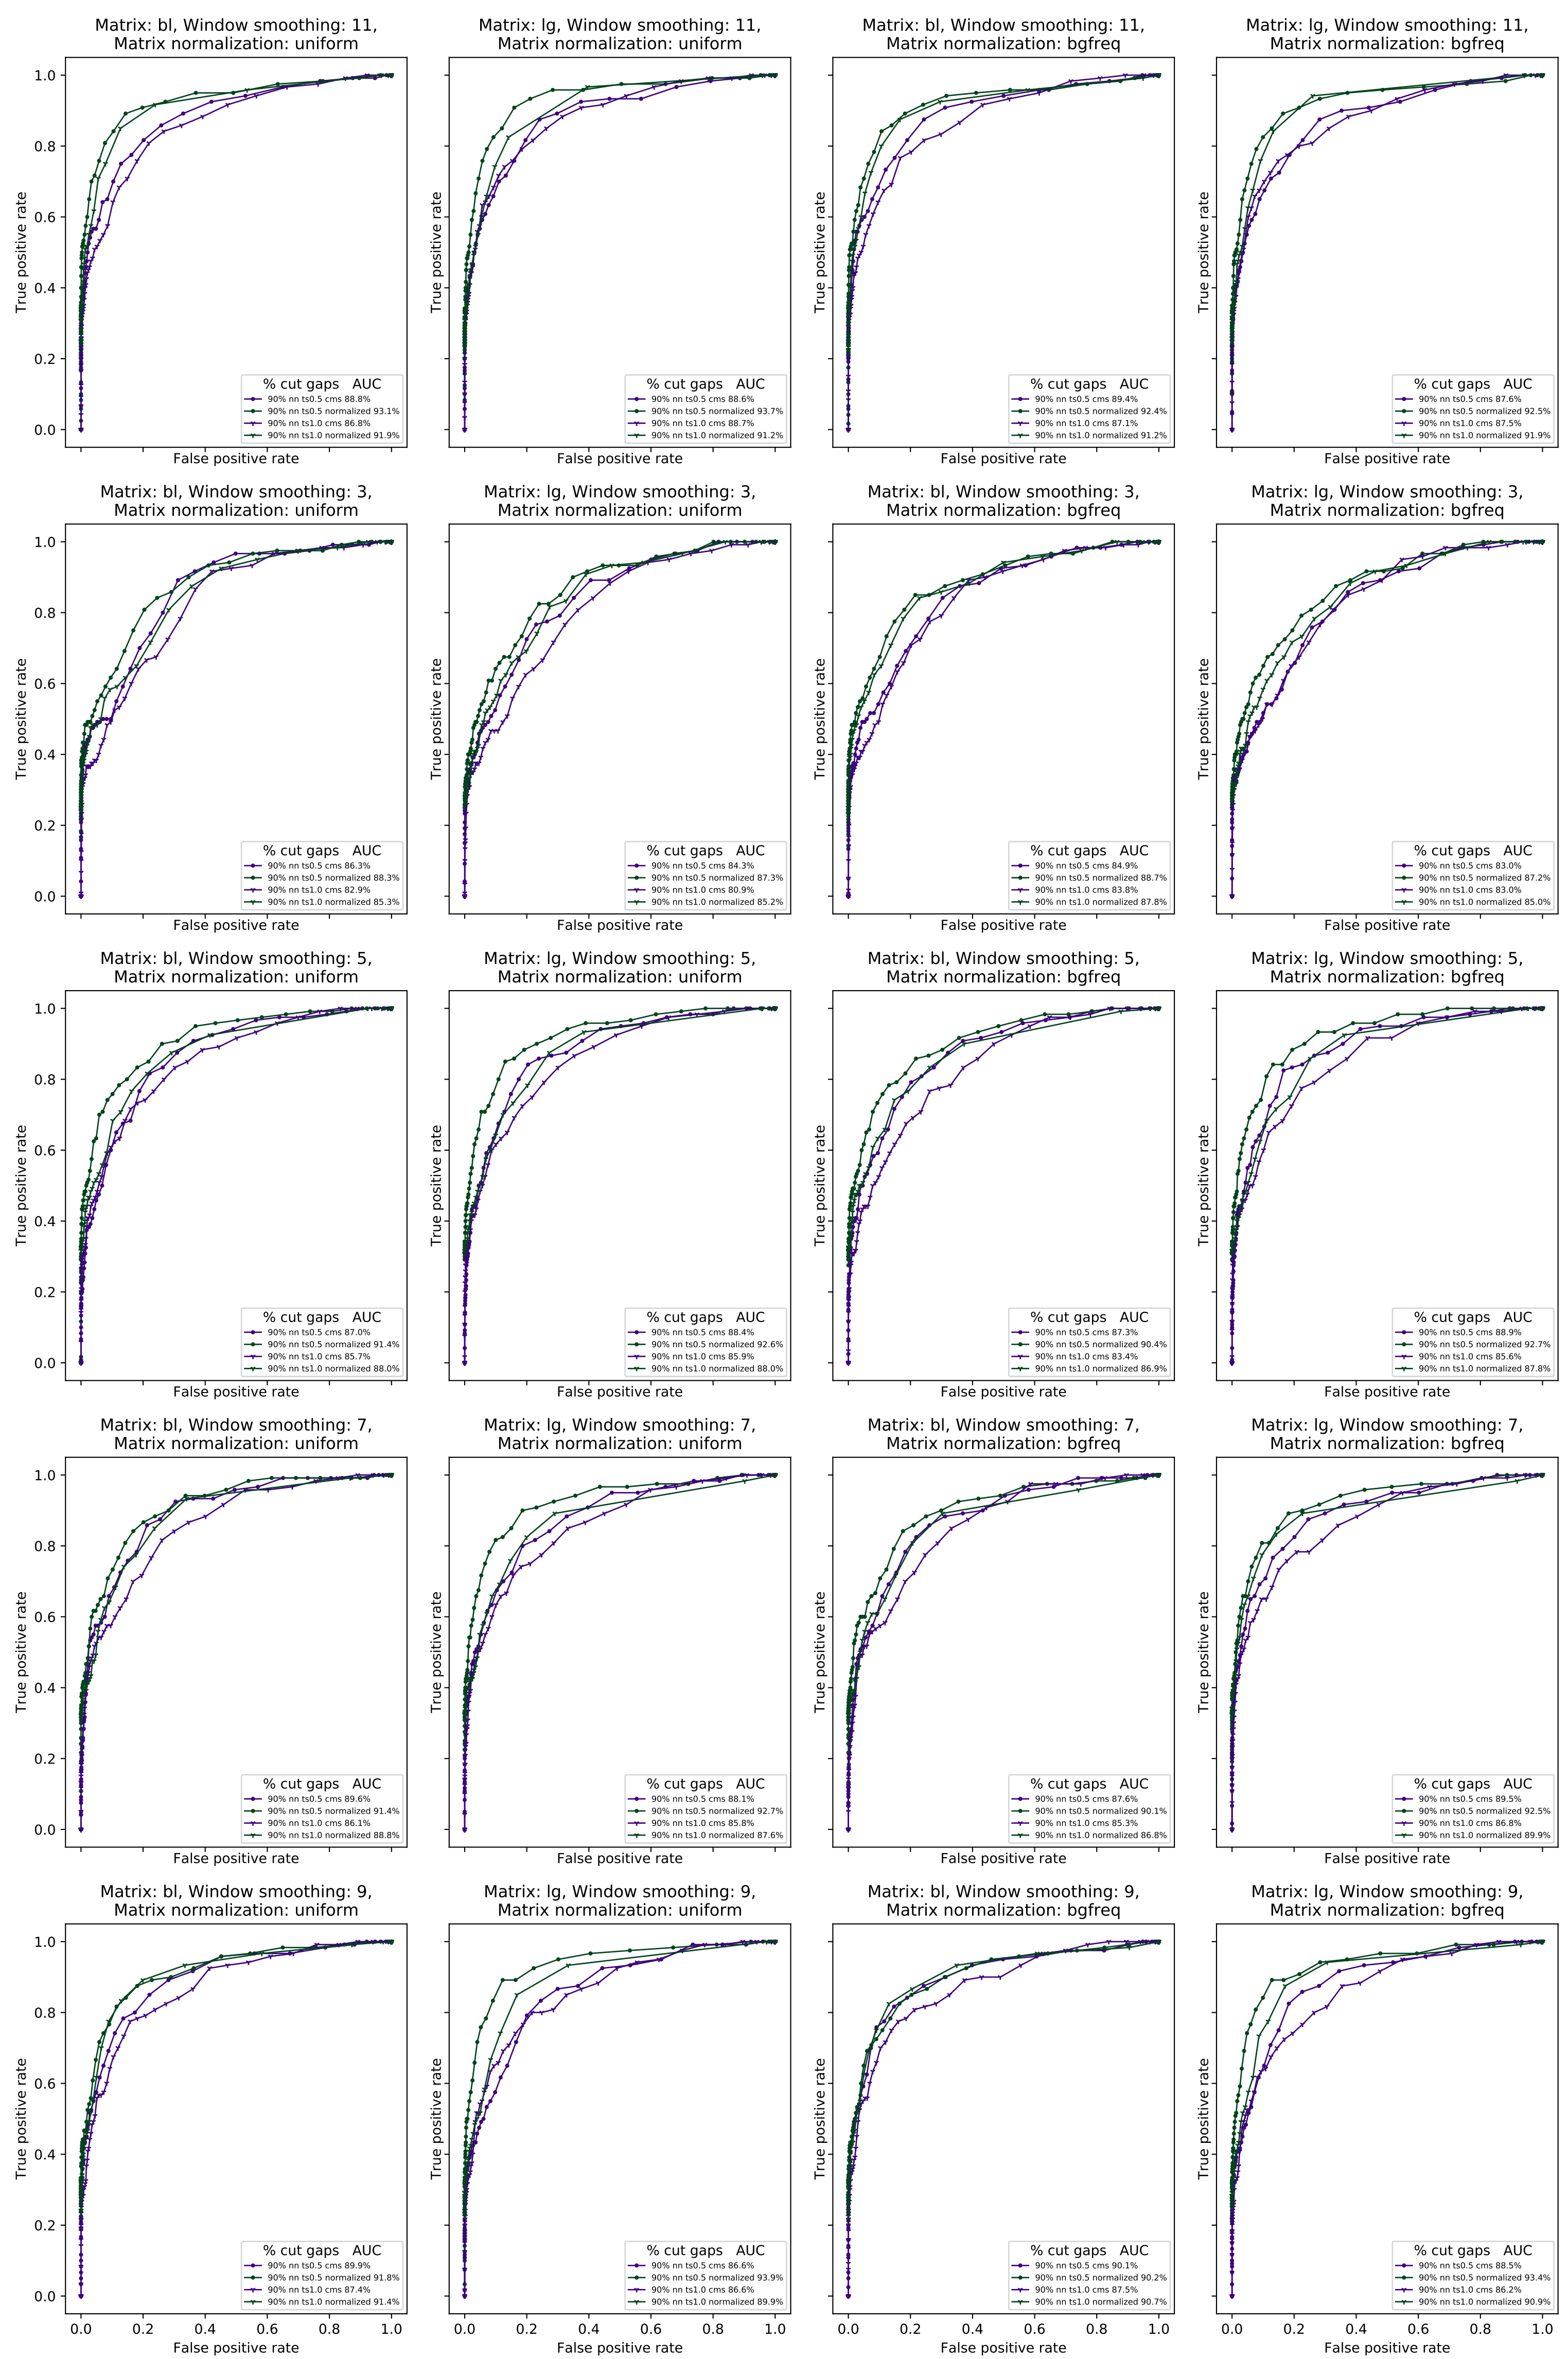



# BBS vs PRST

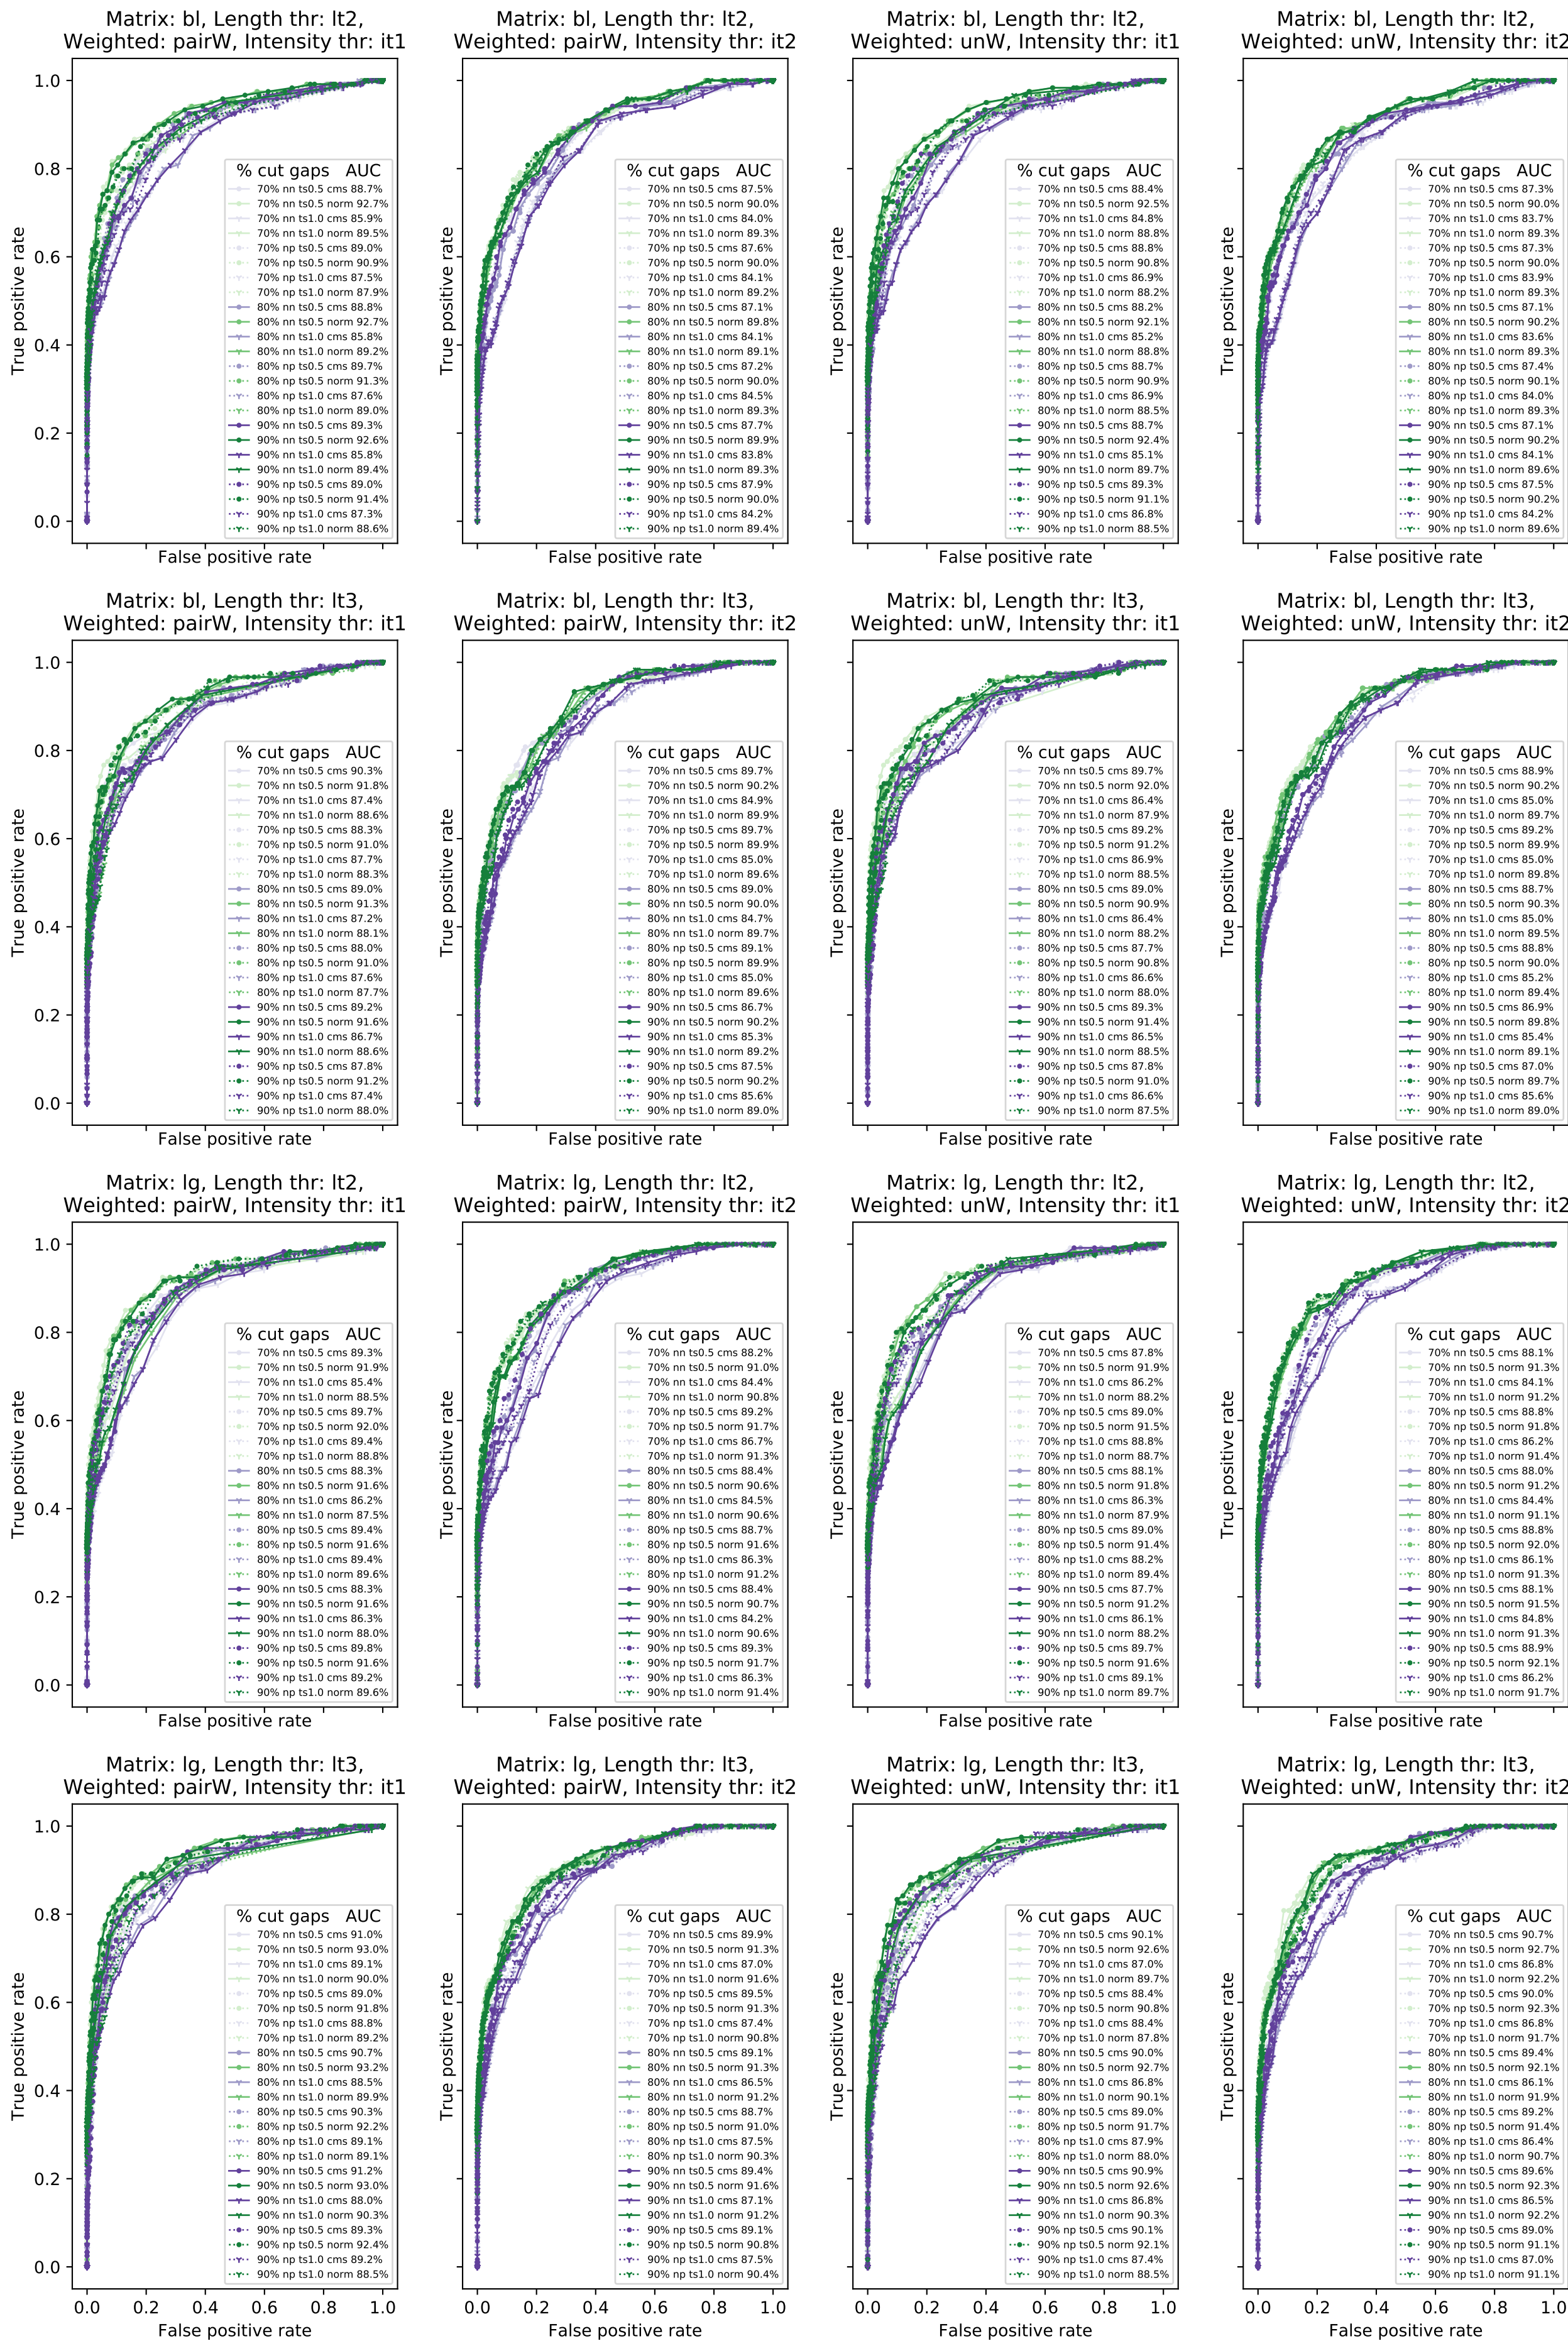



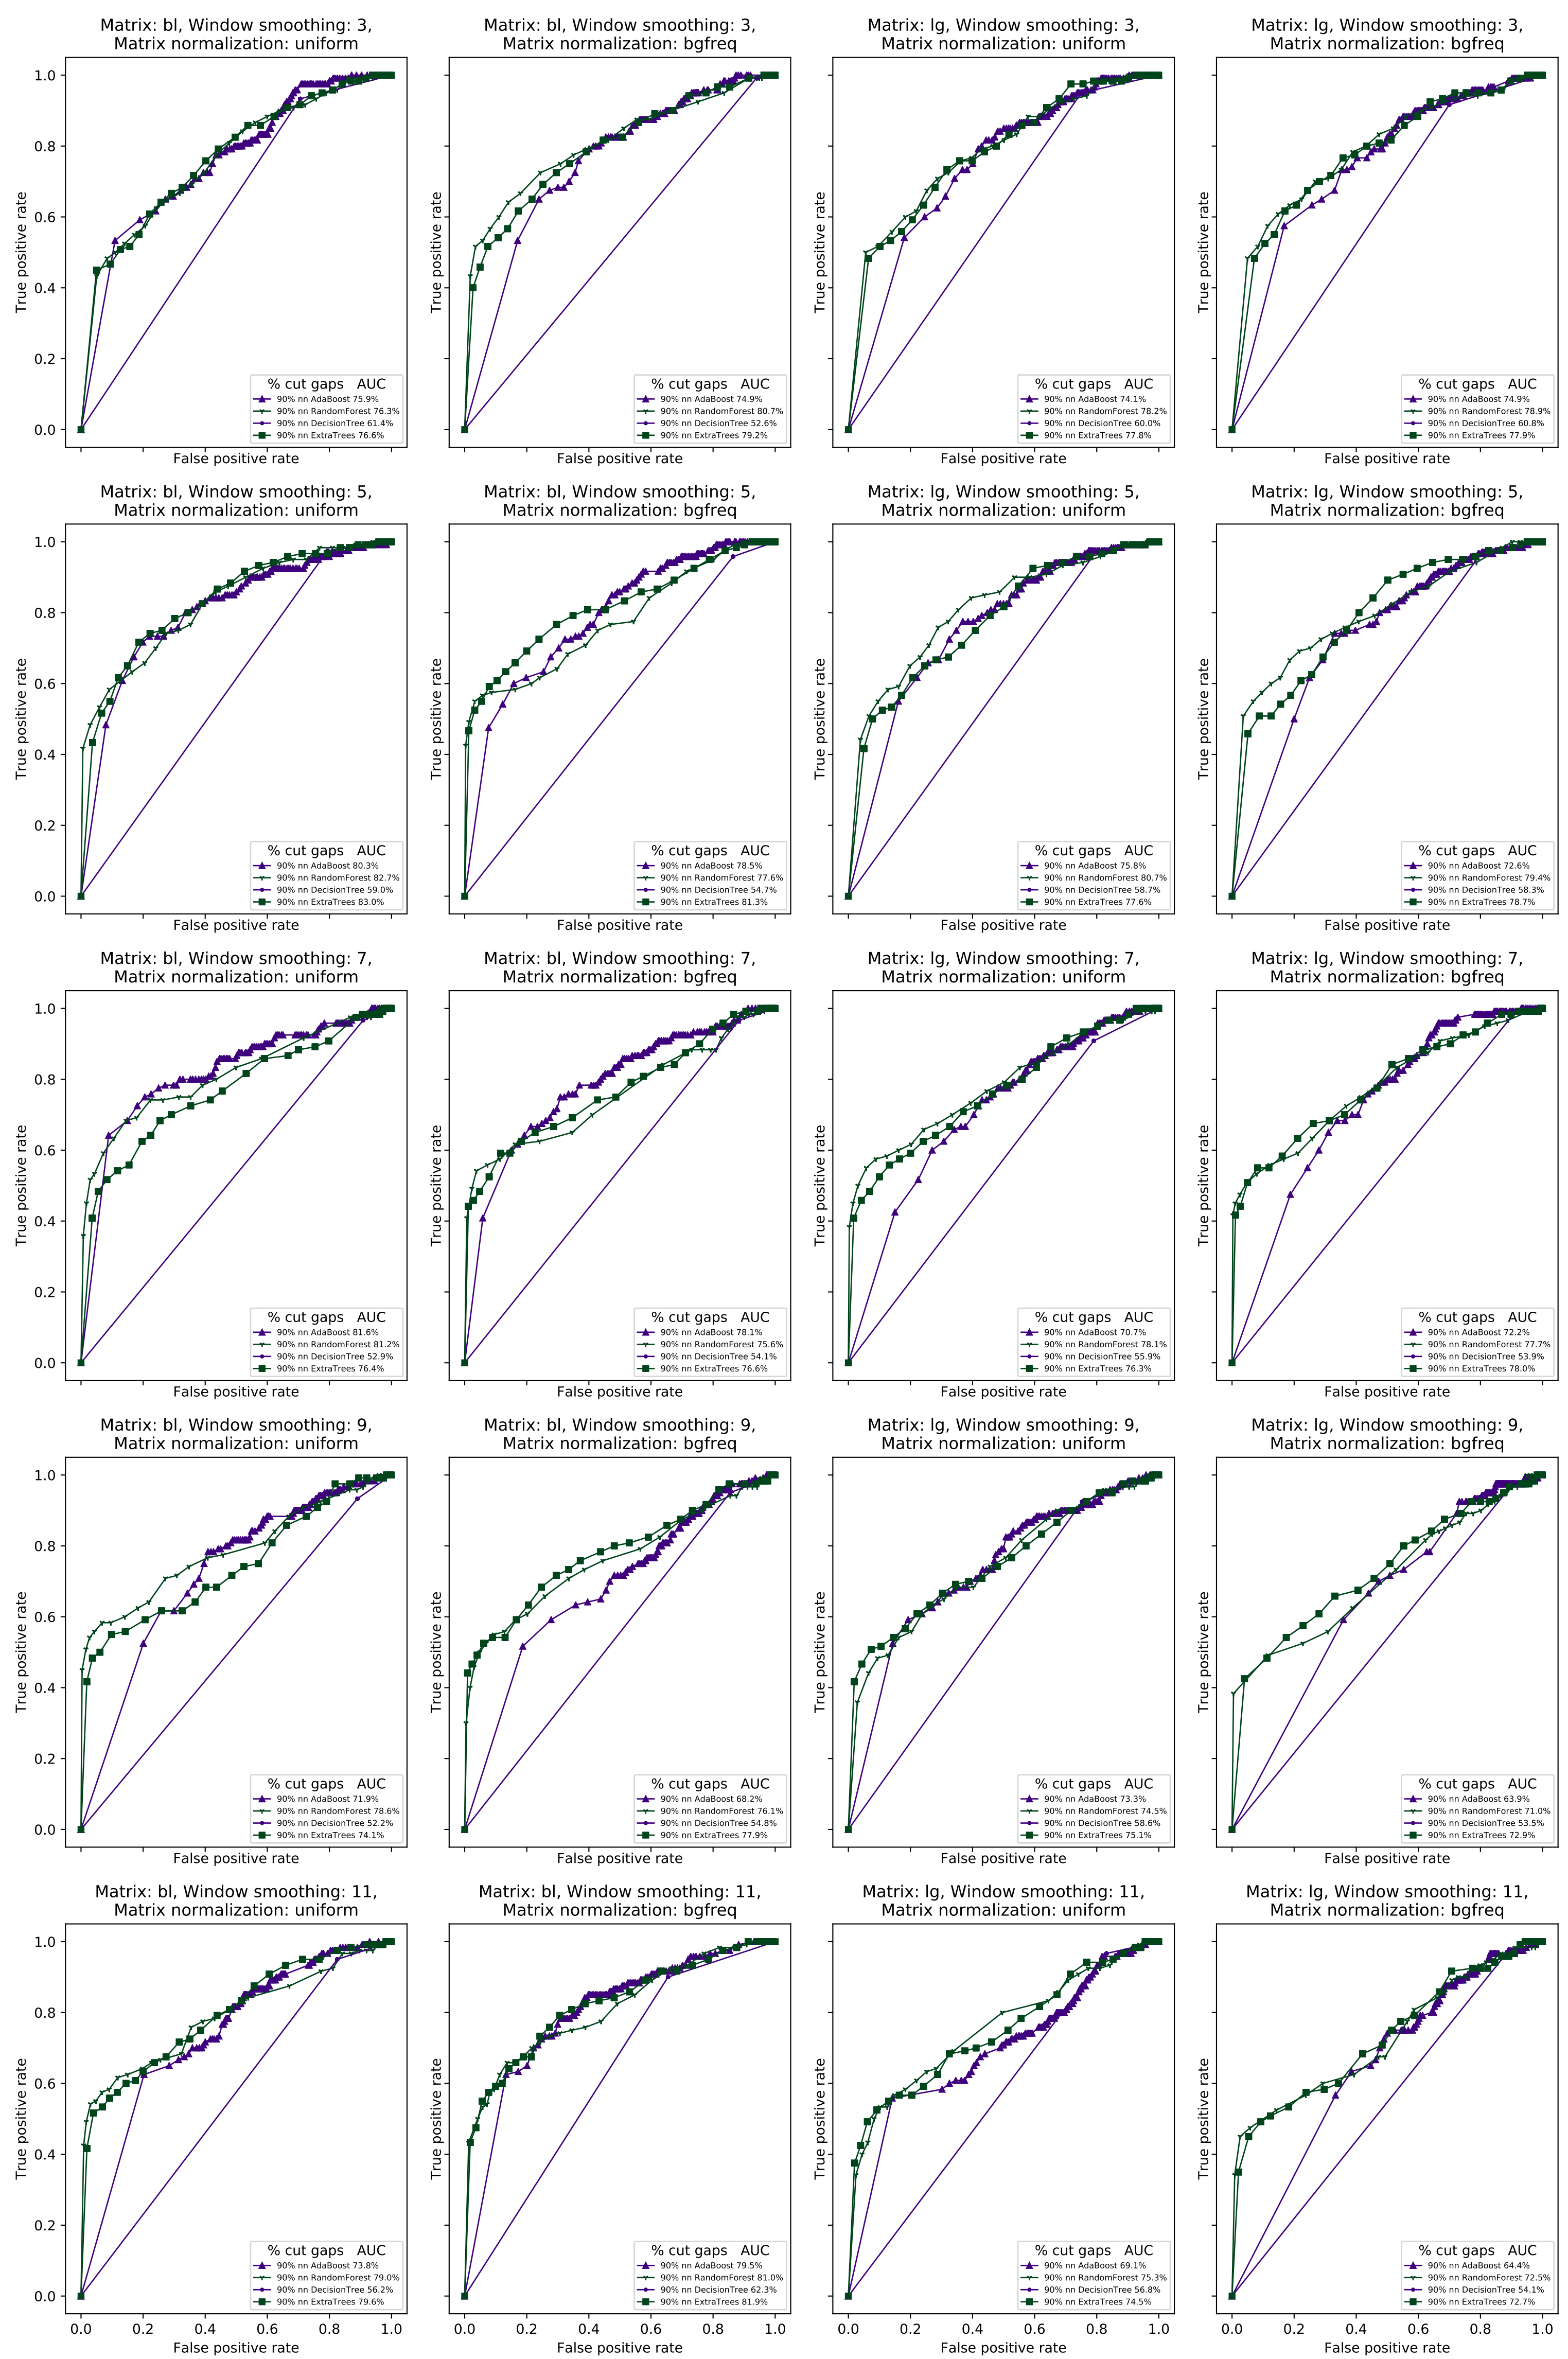

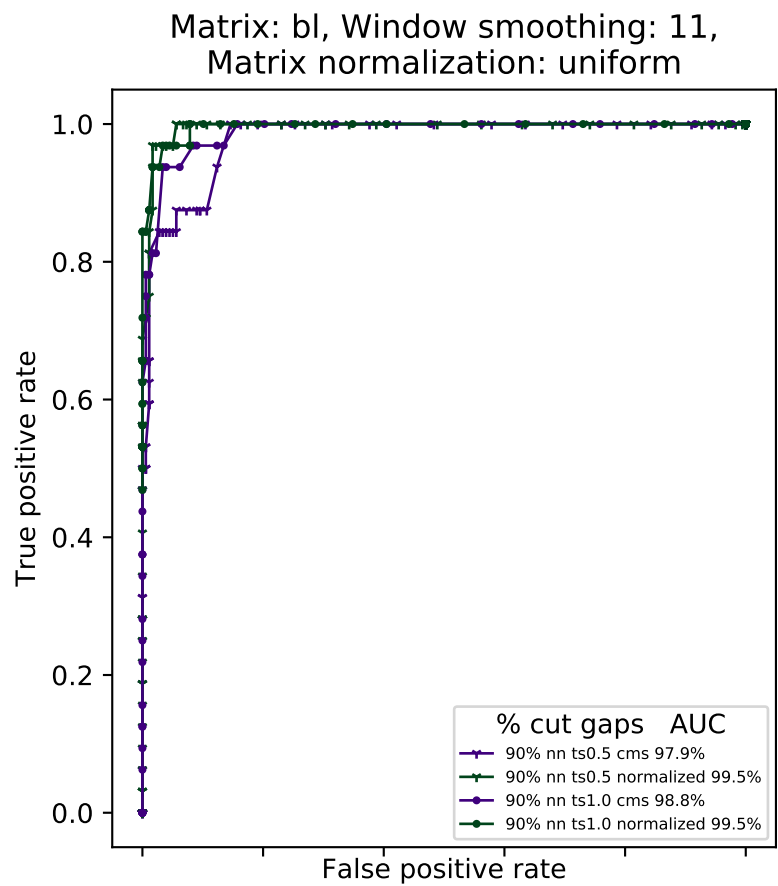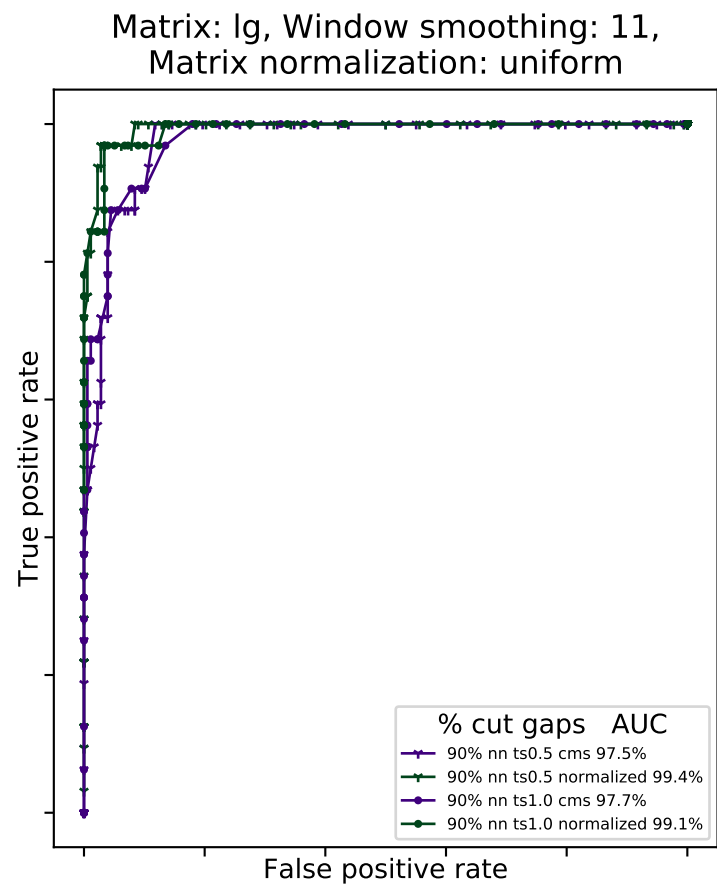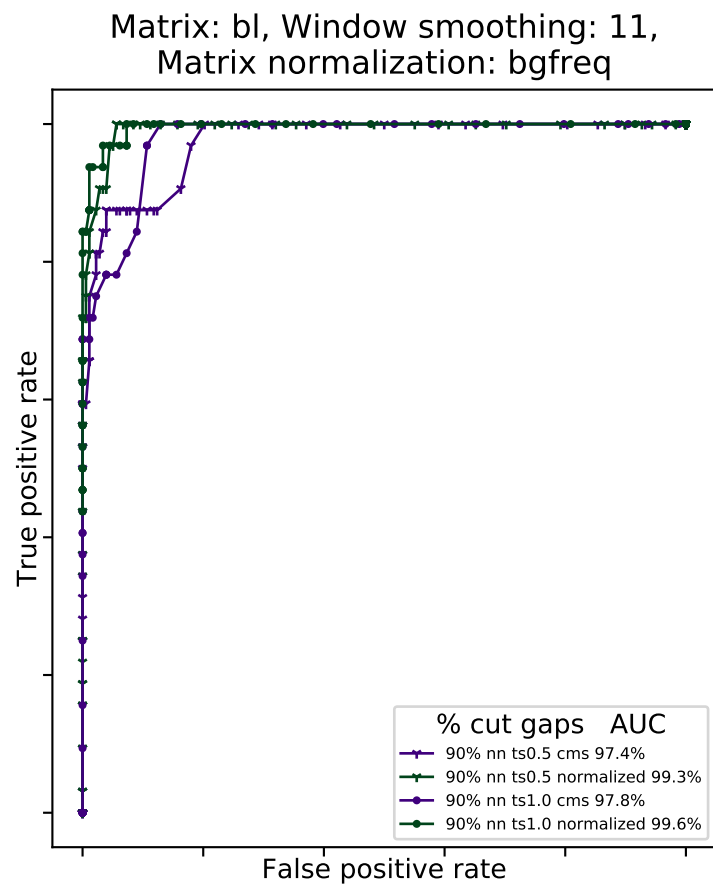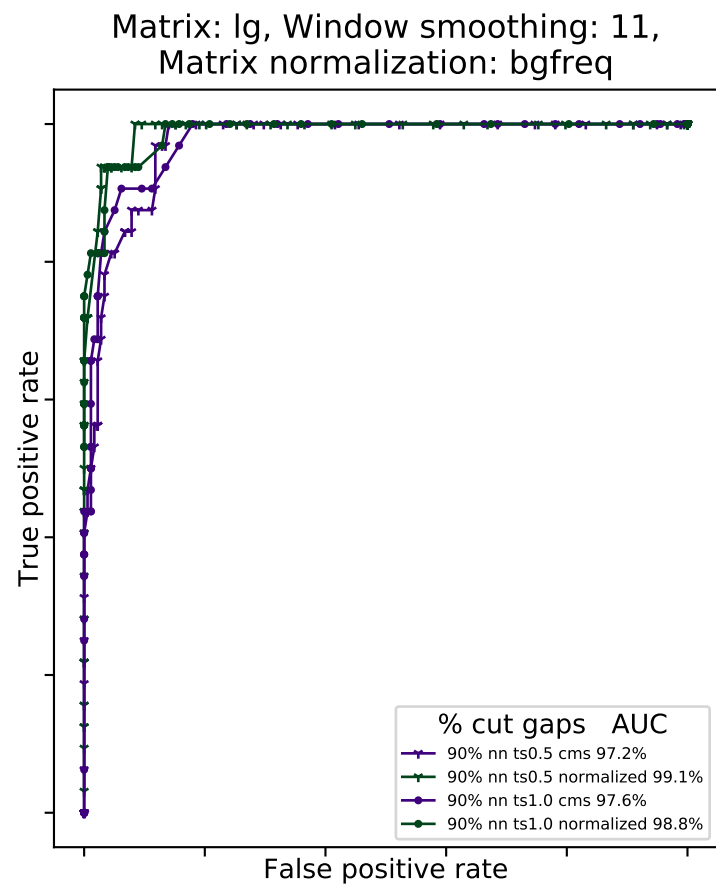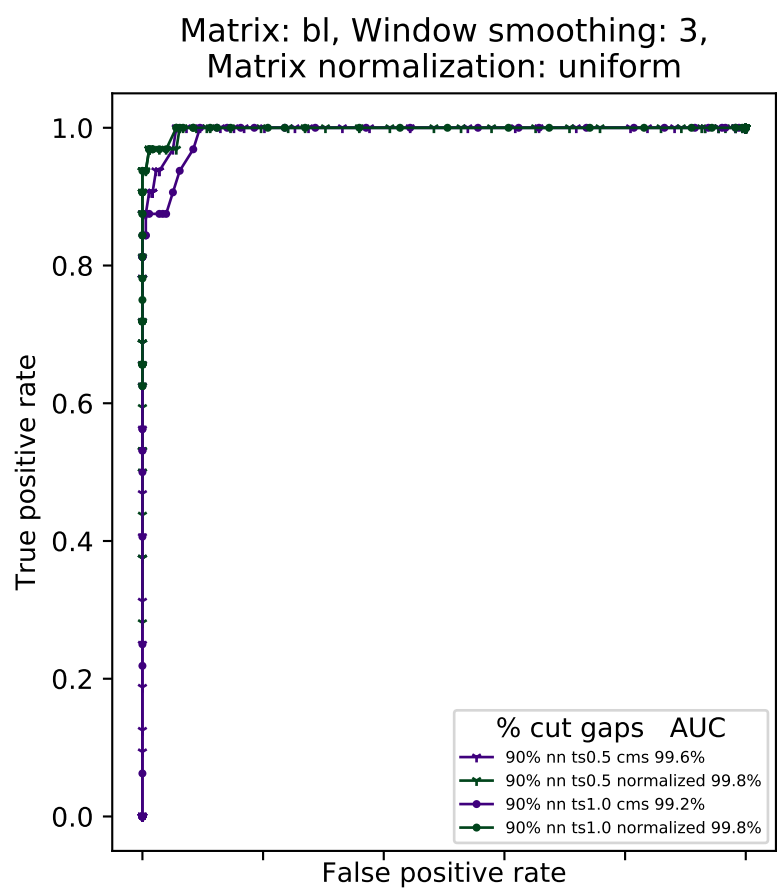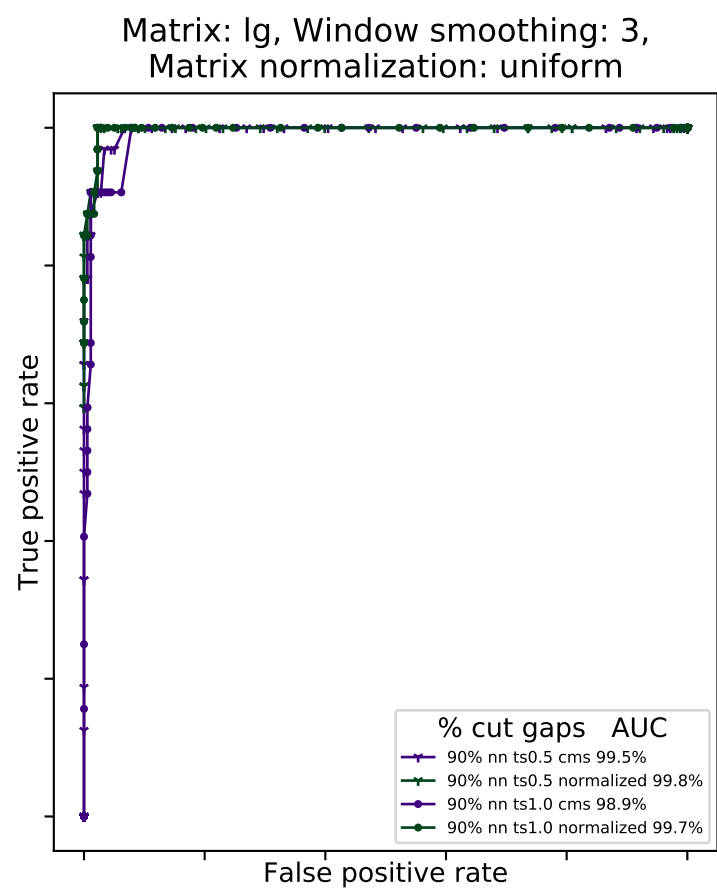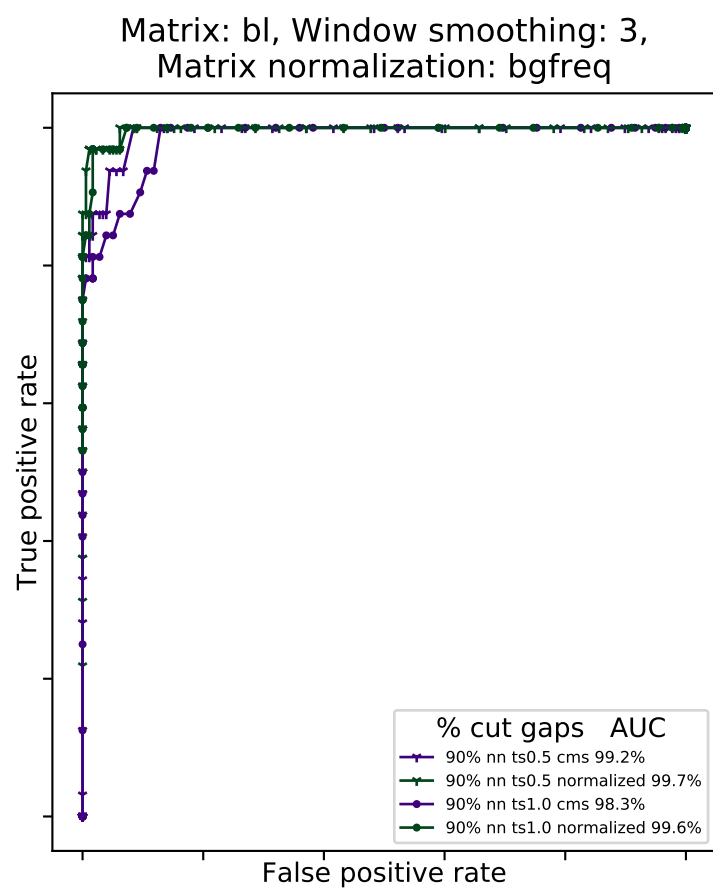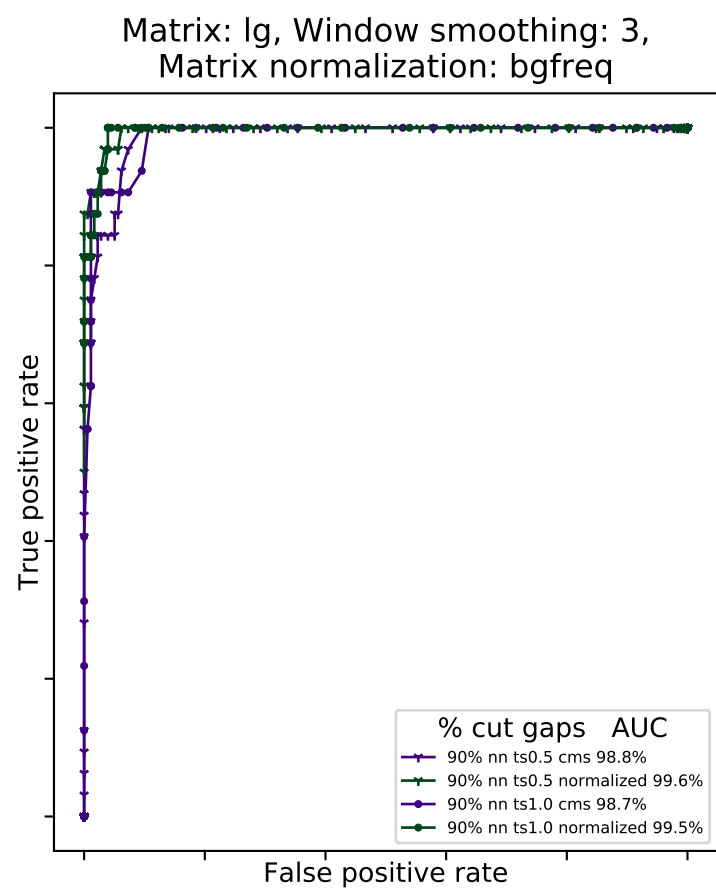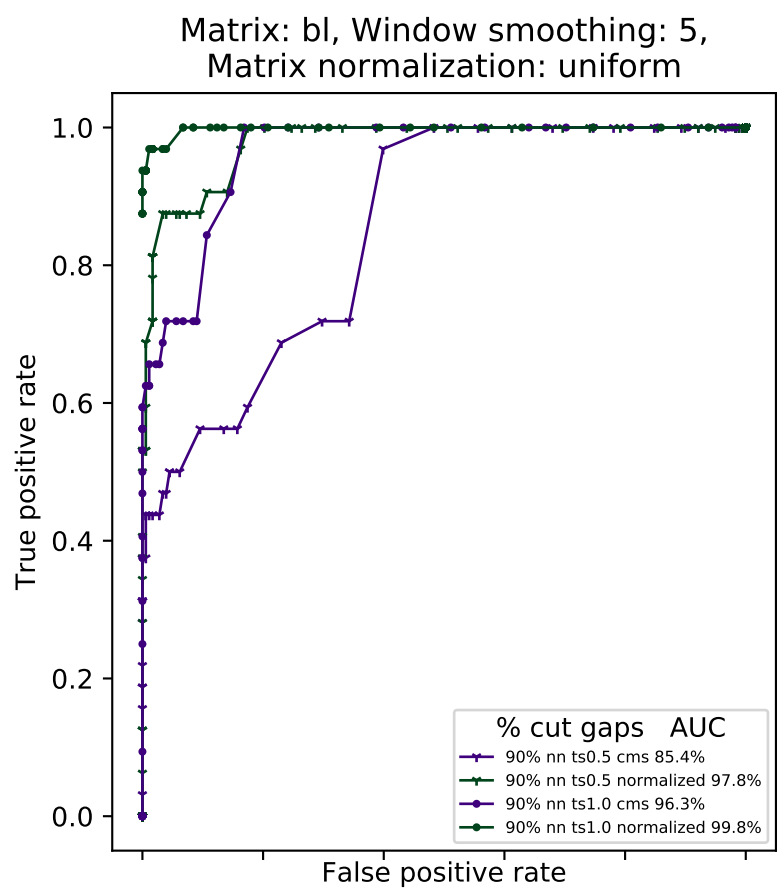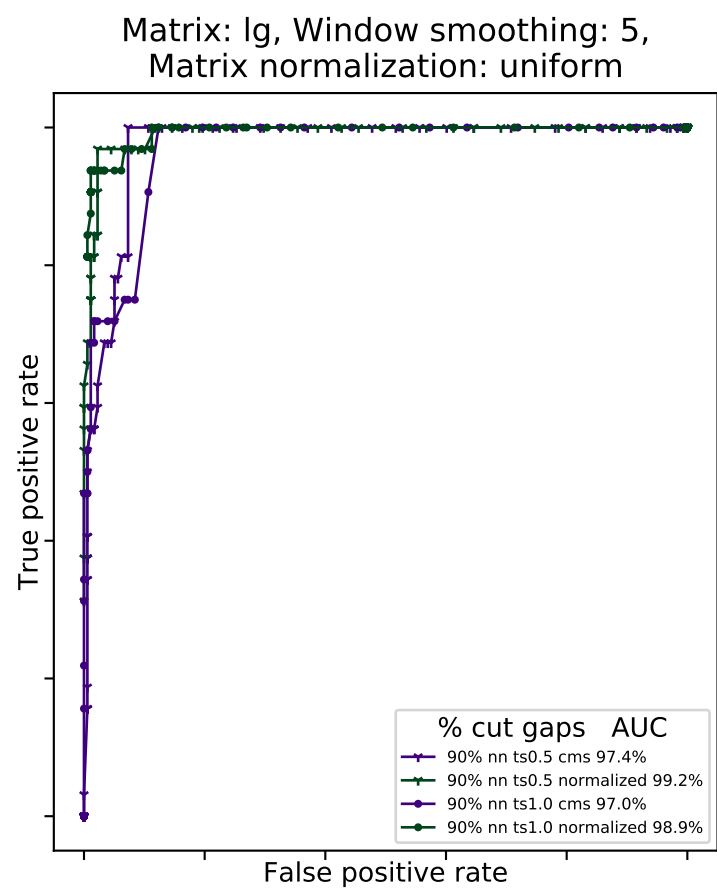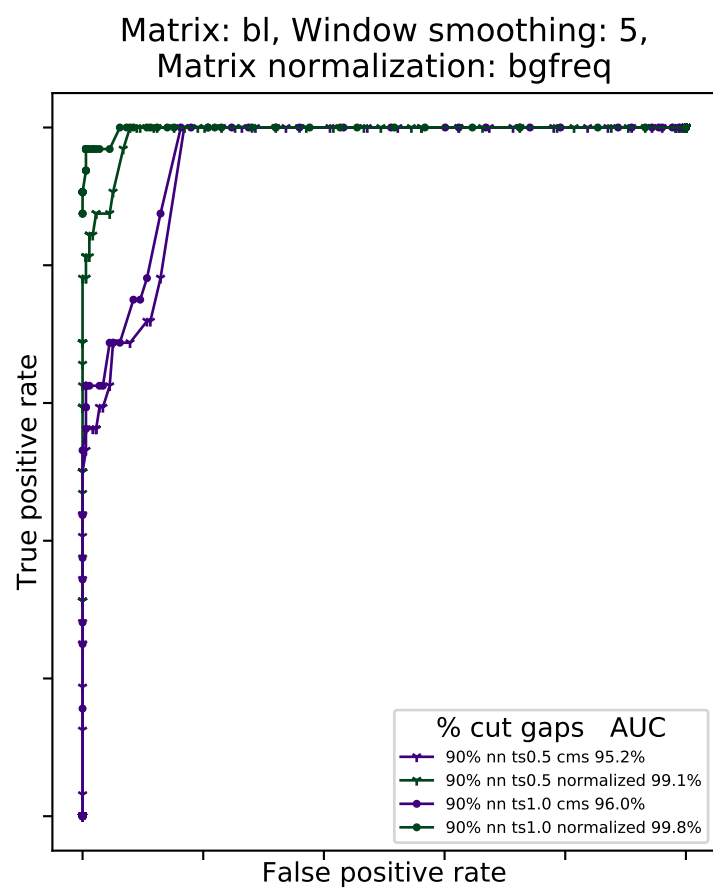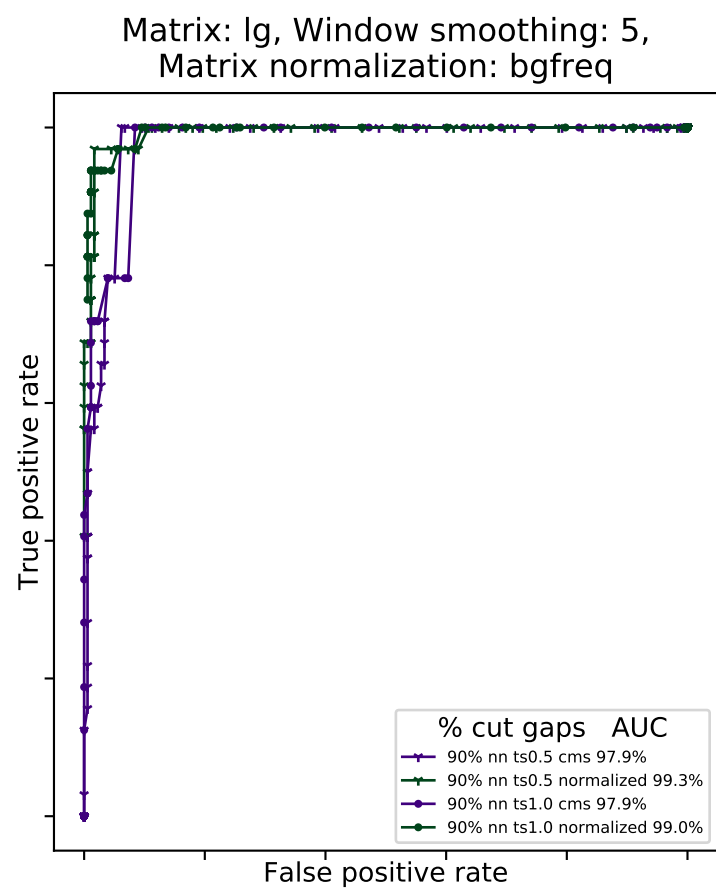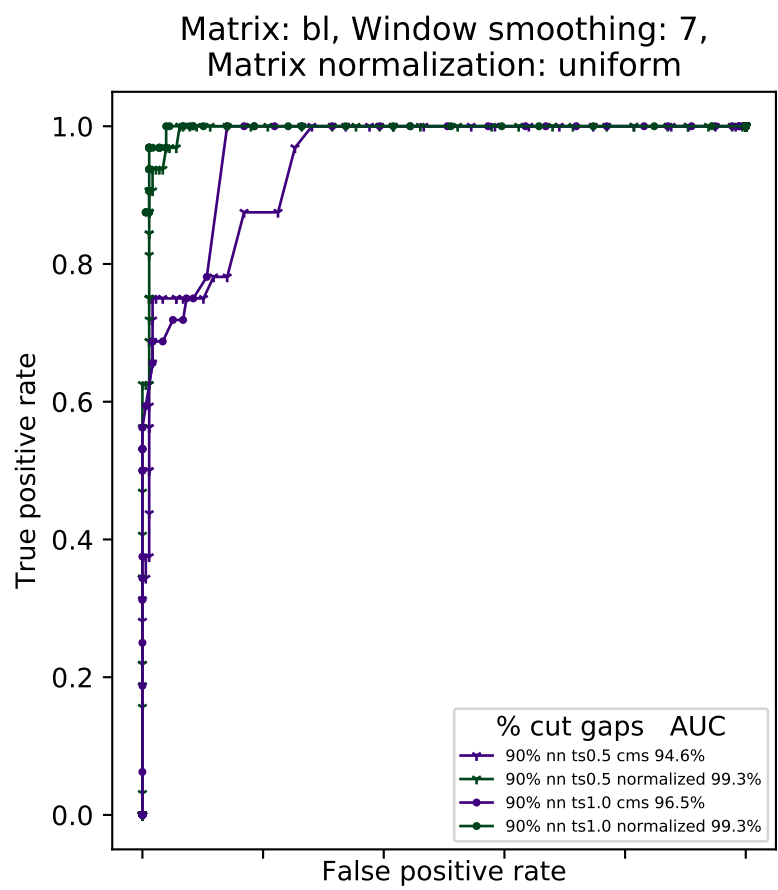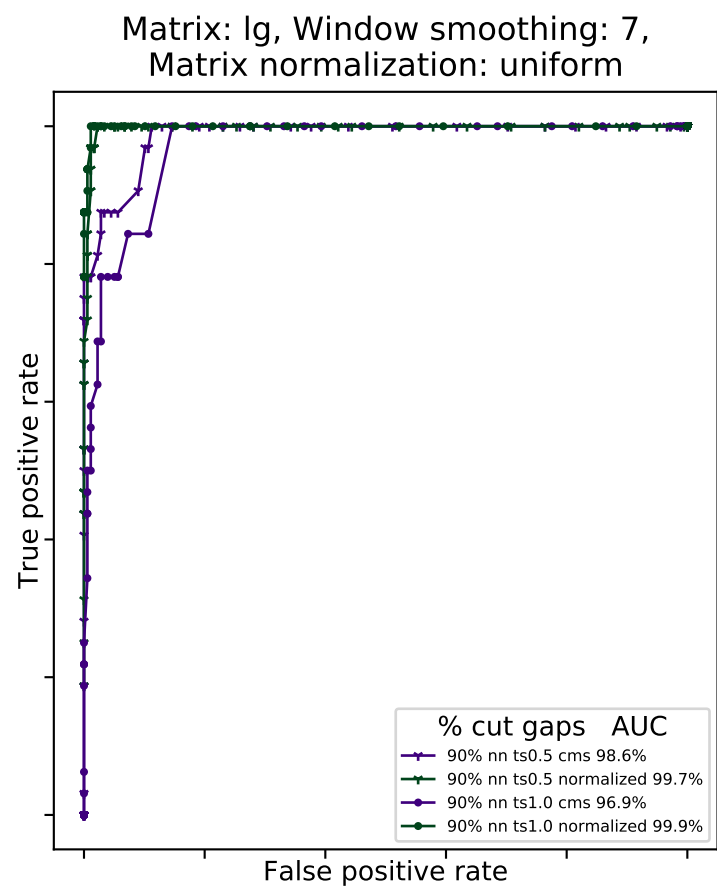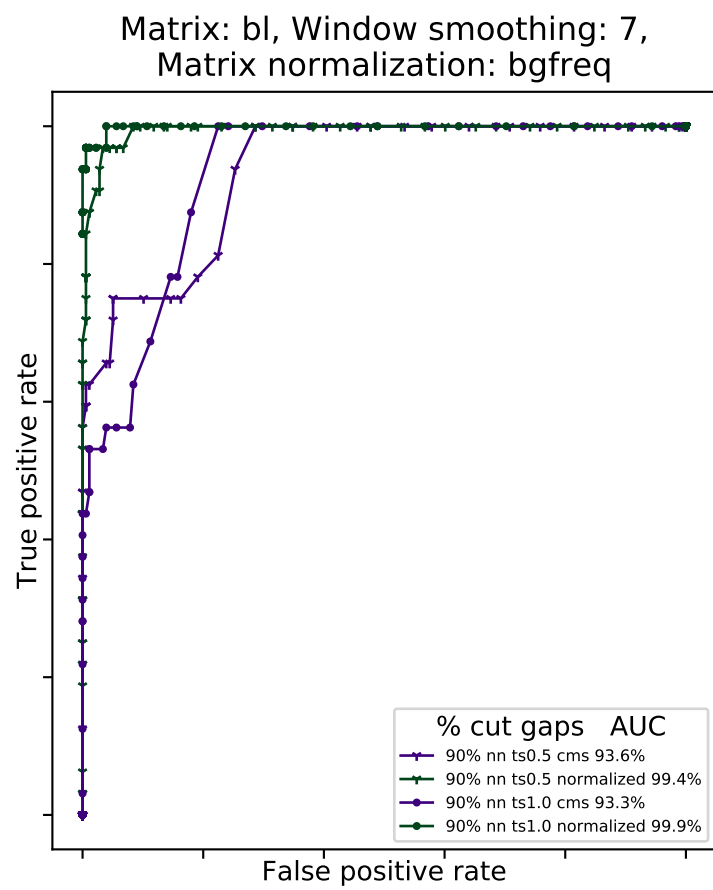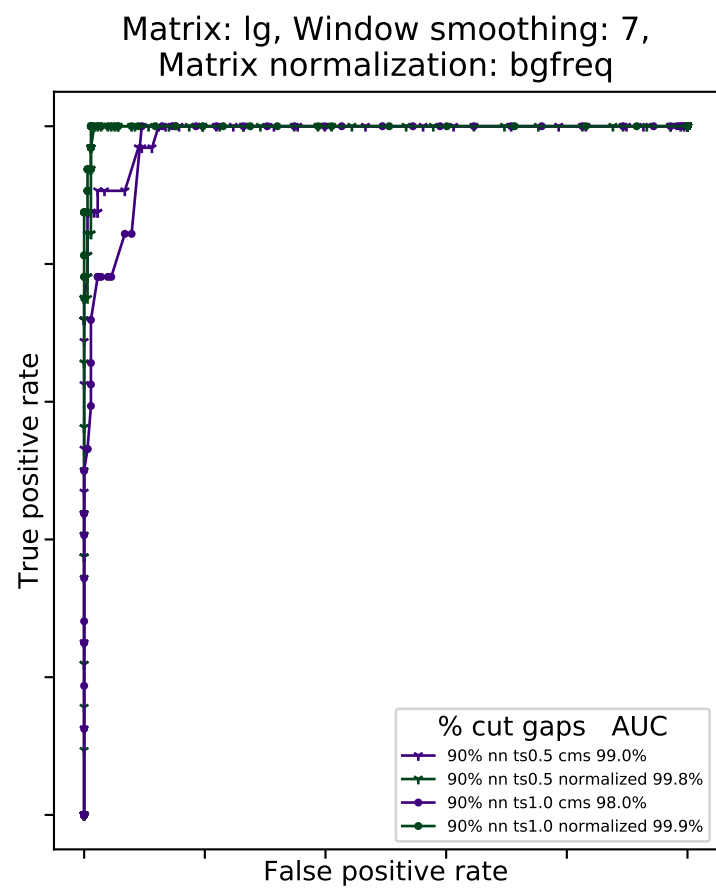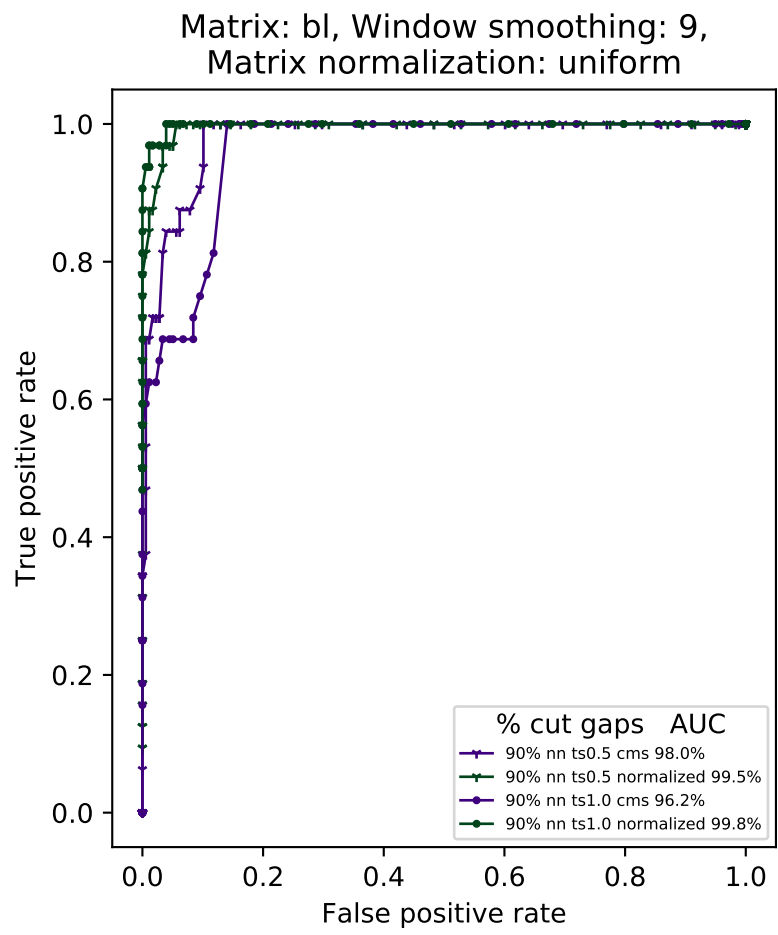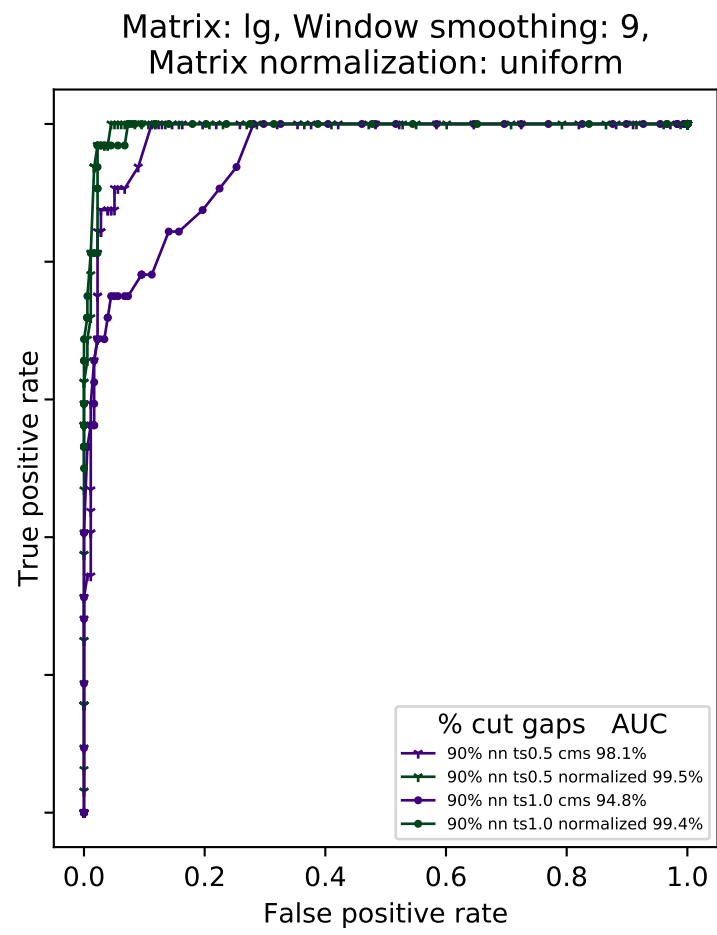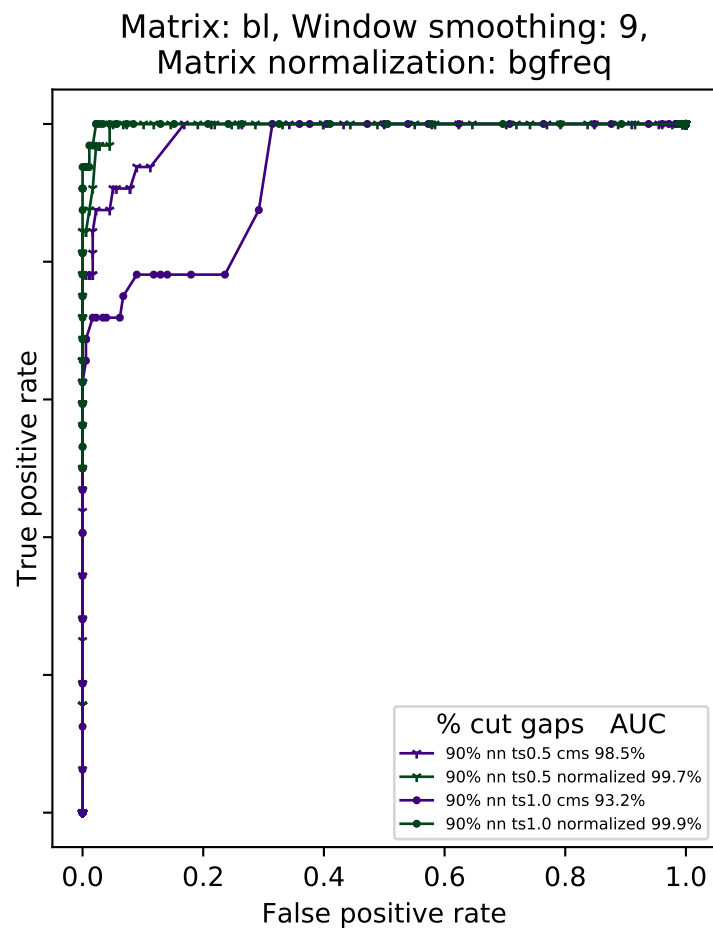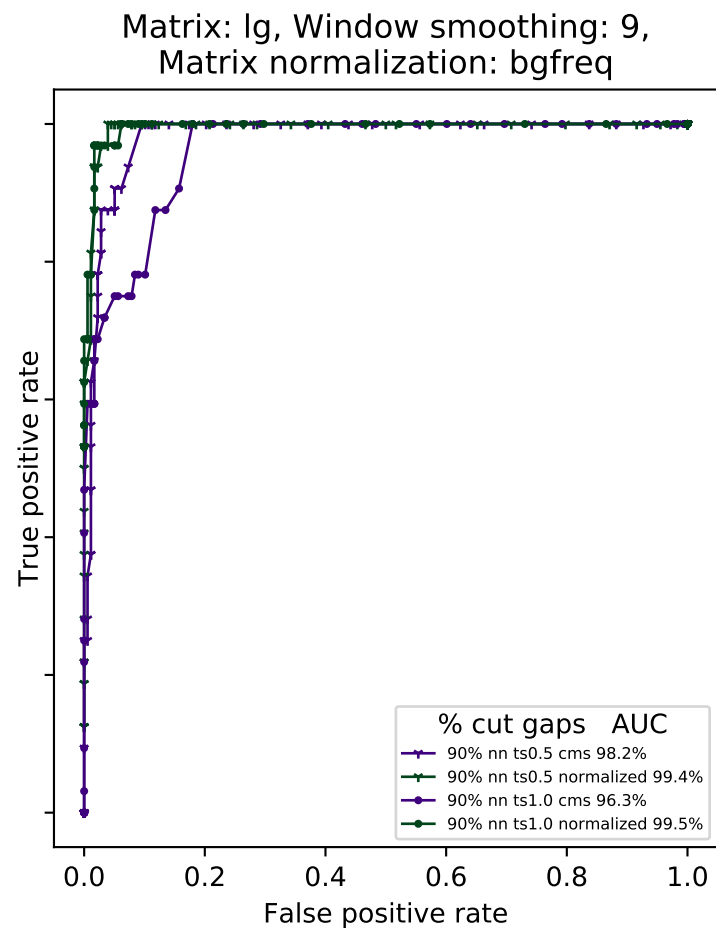



# BBS vs rProt

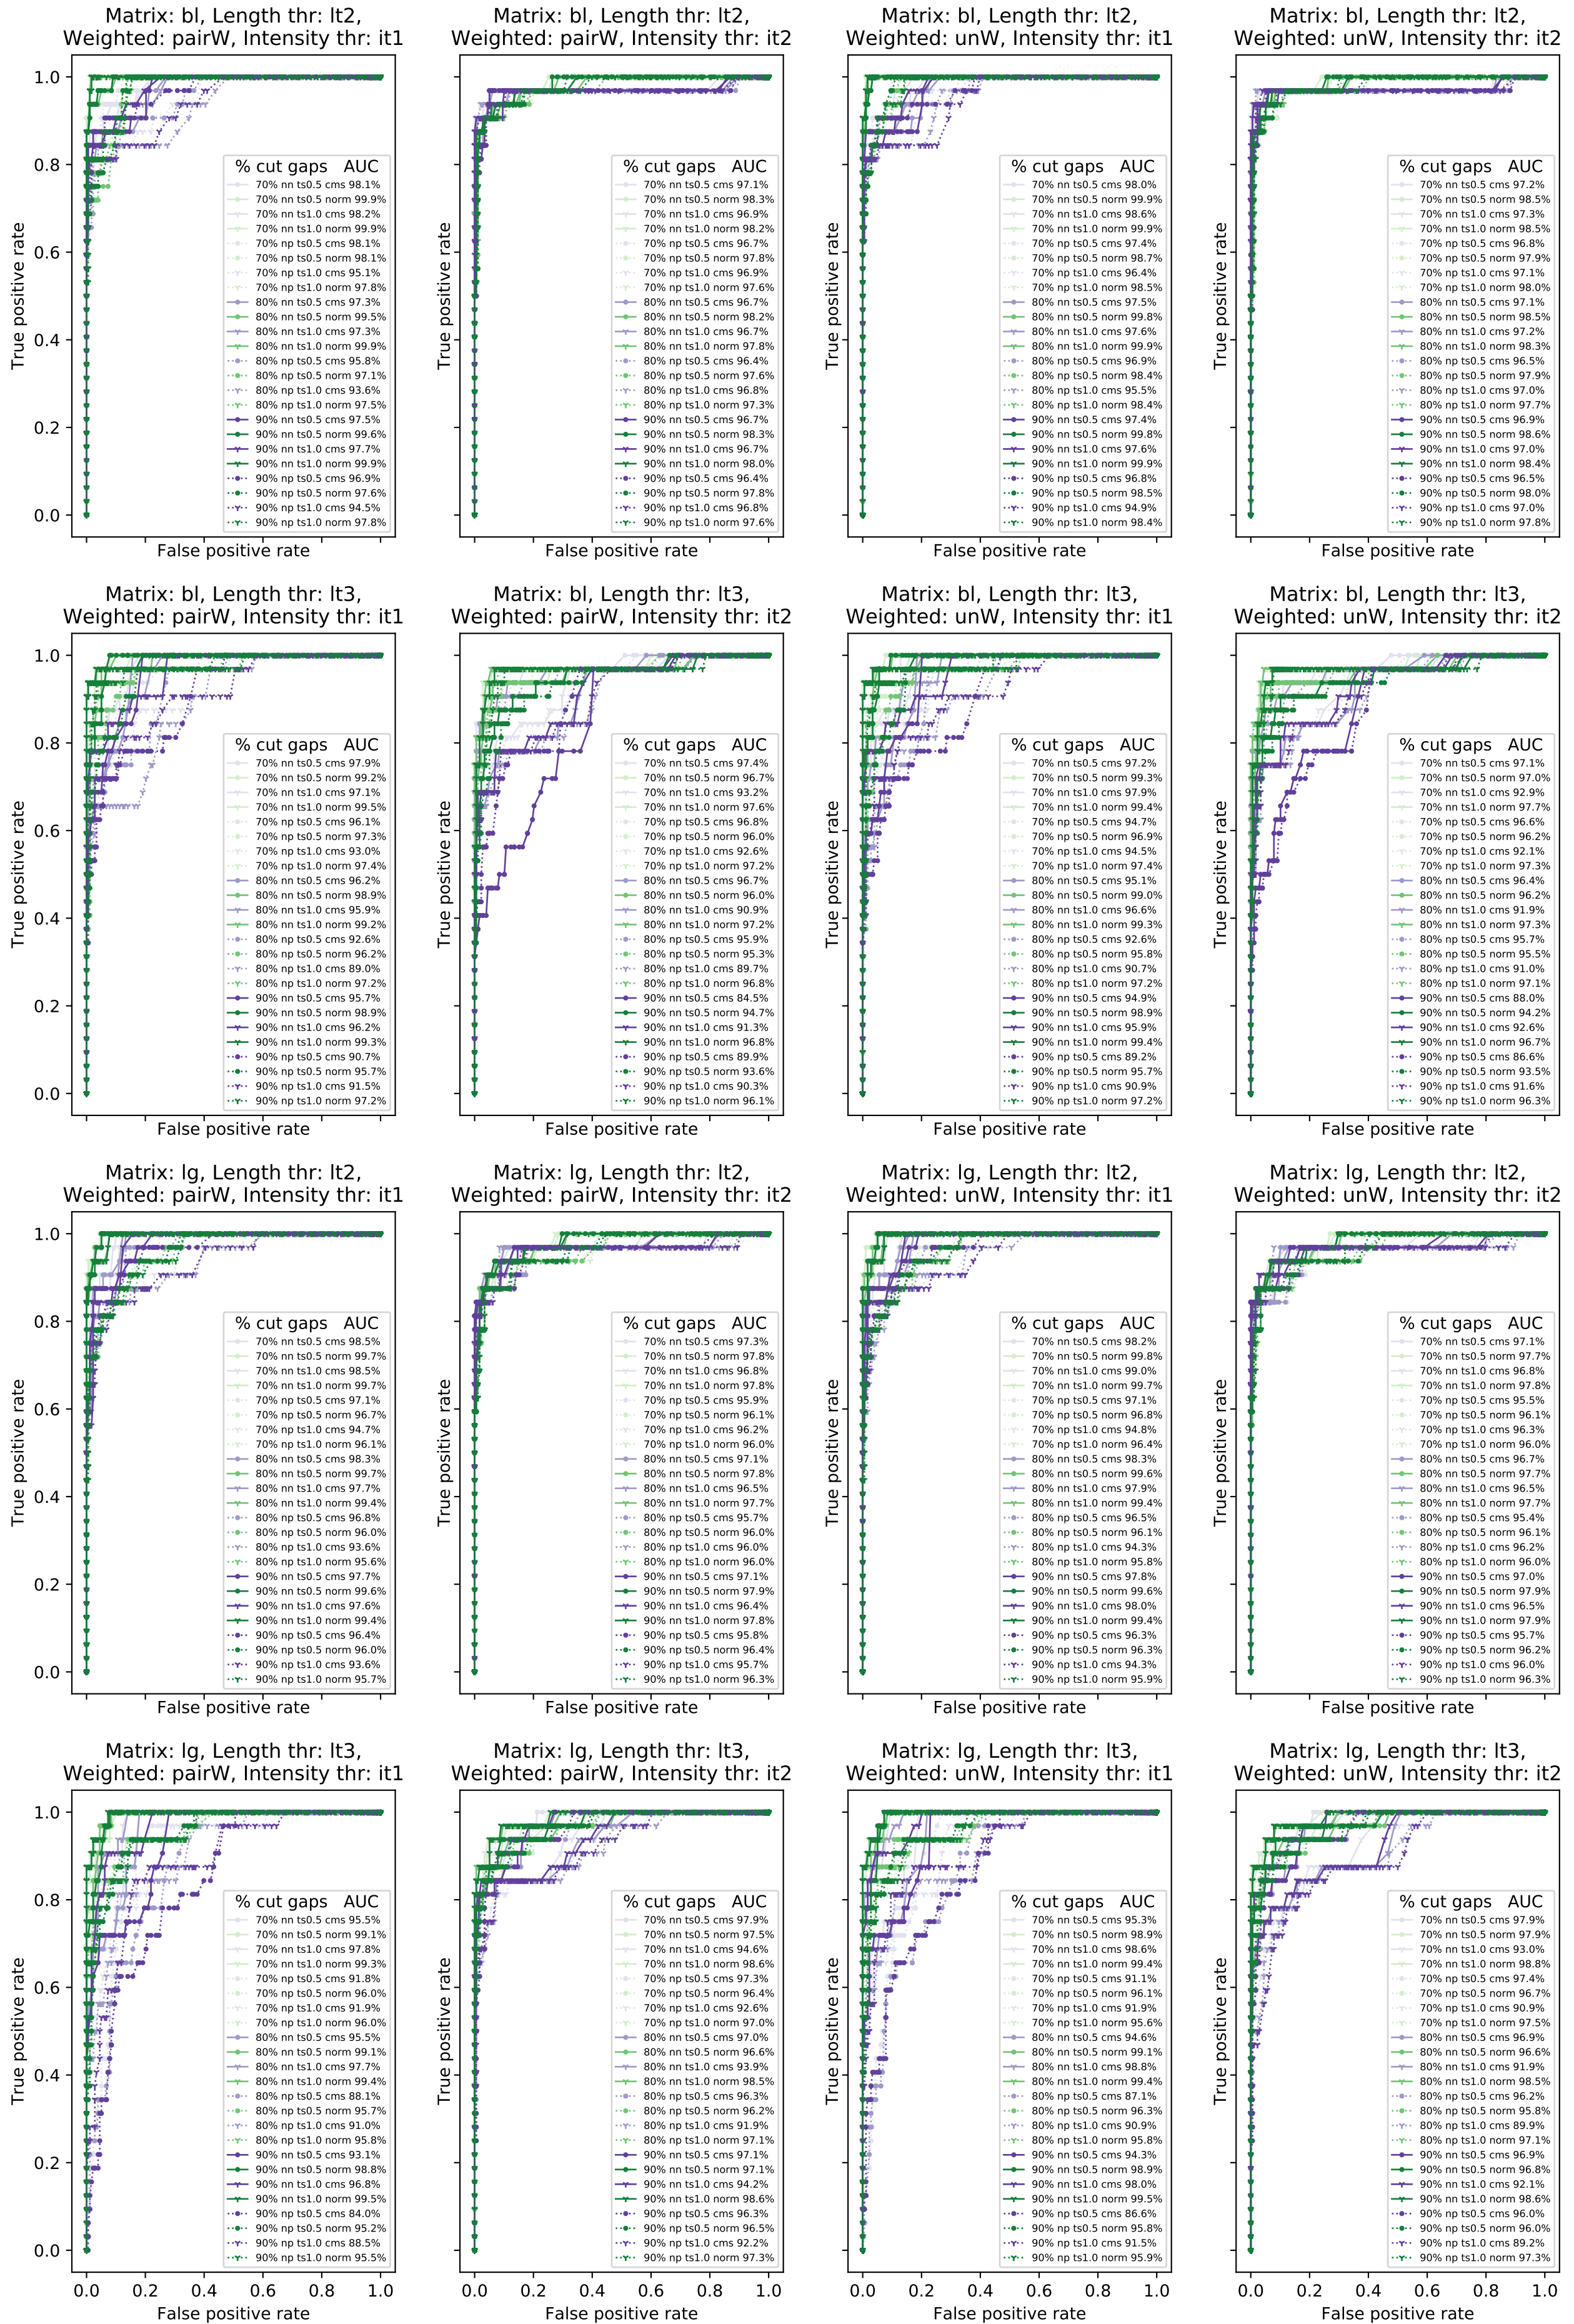



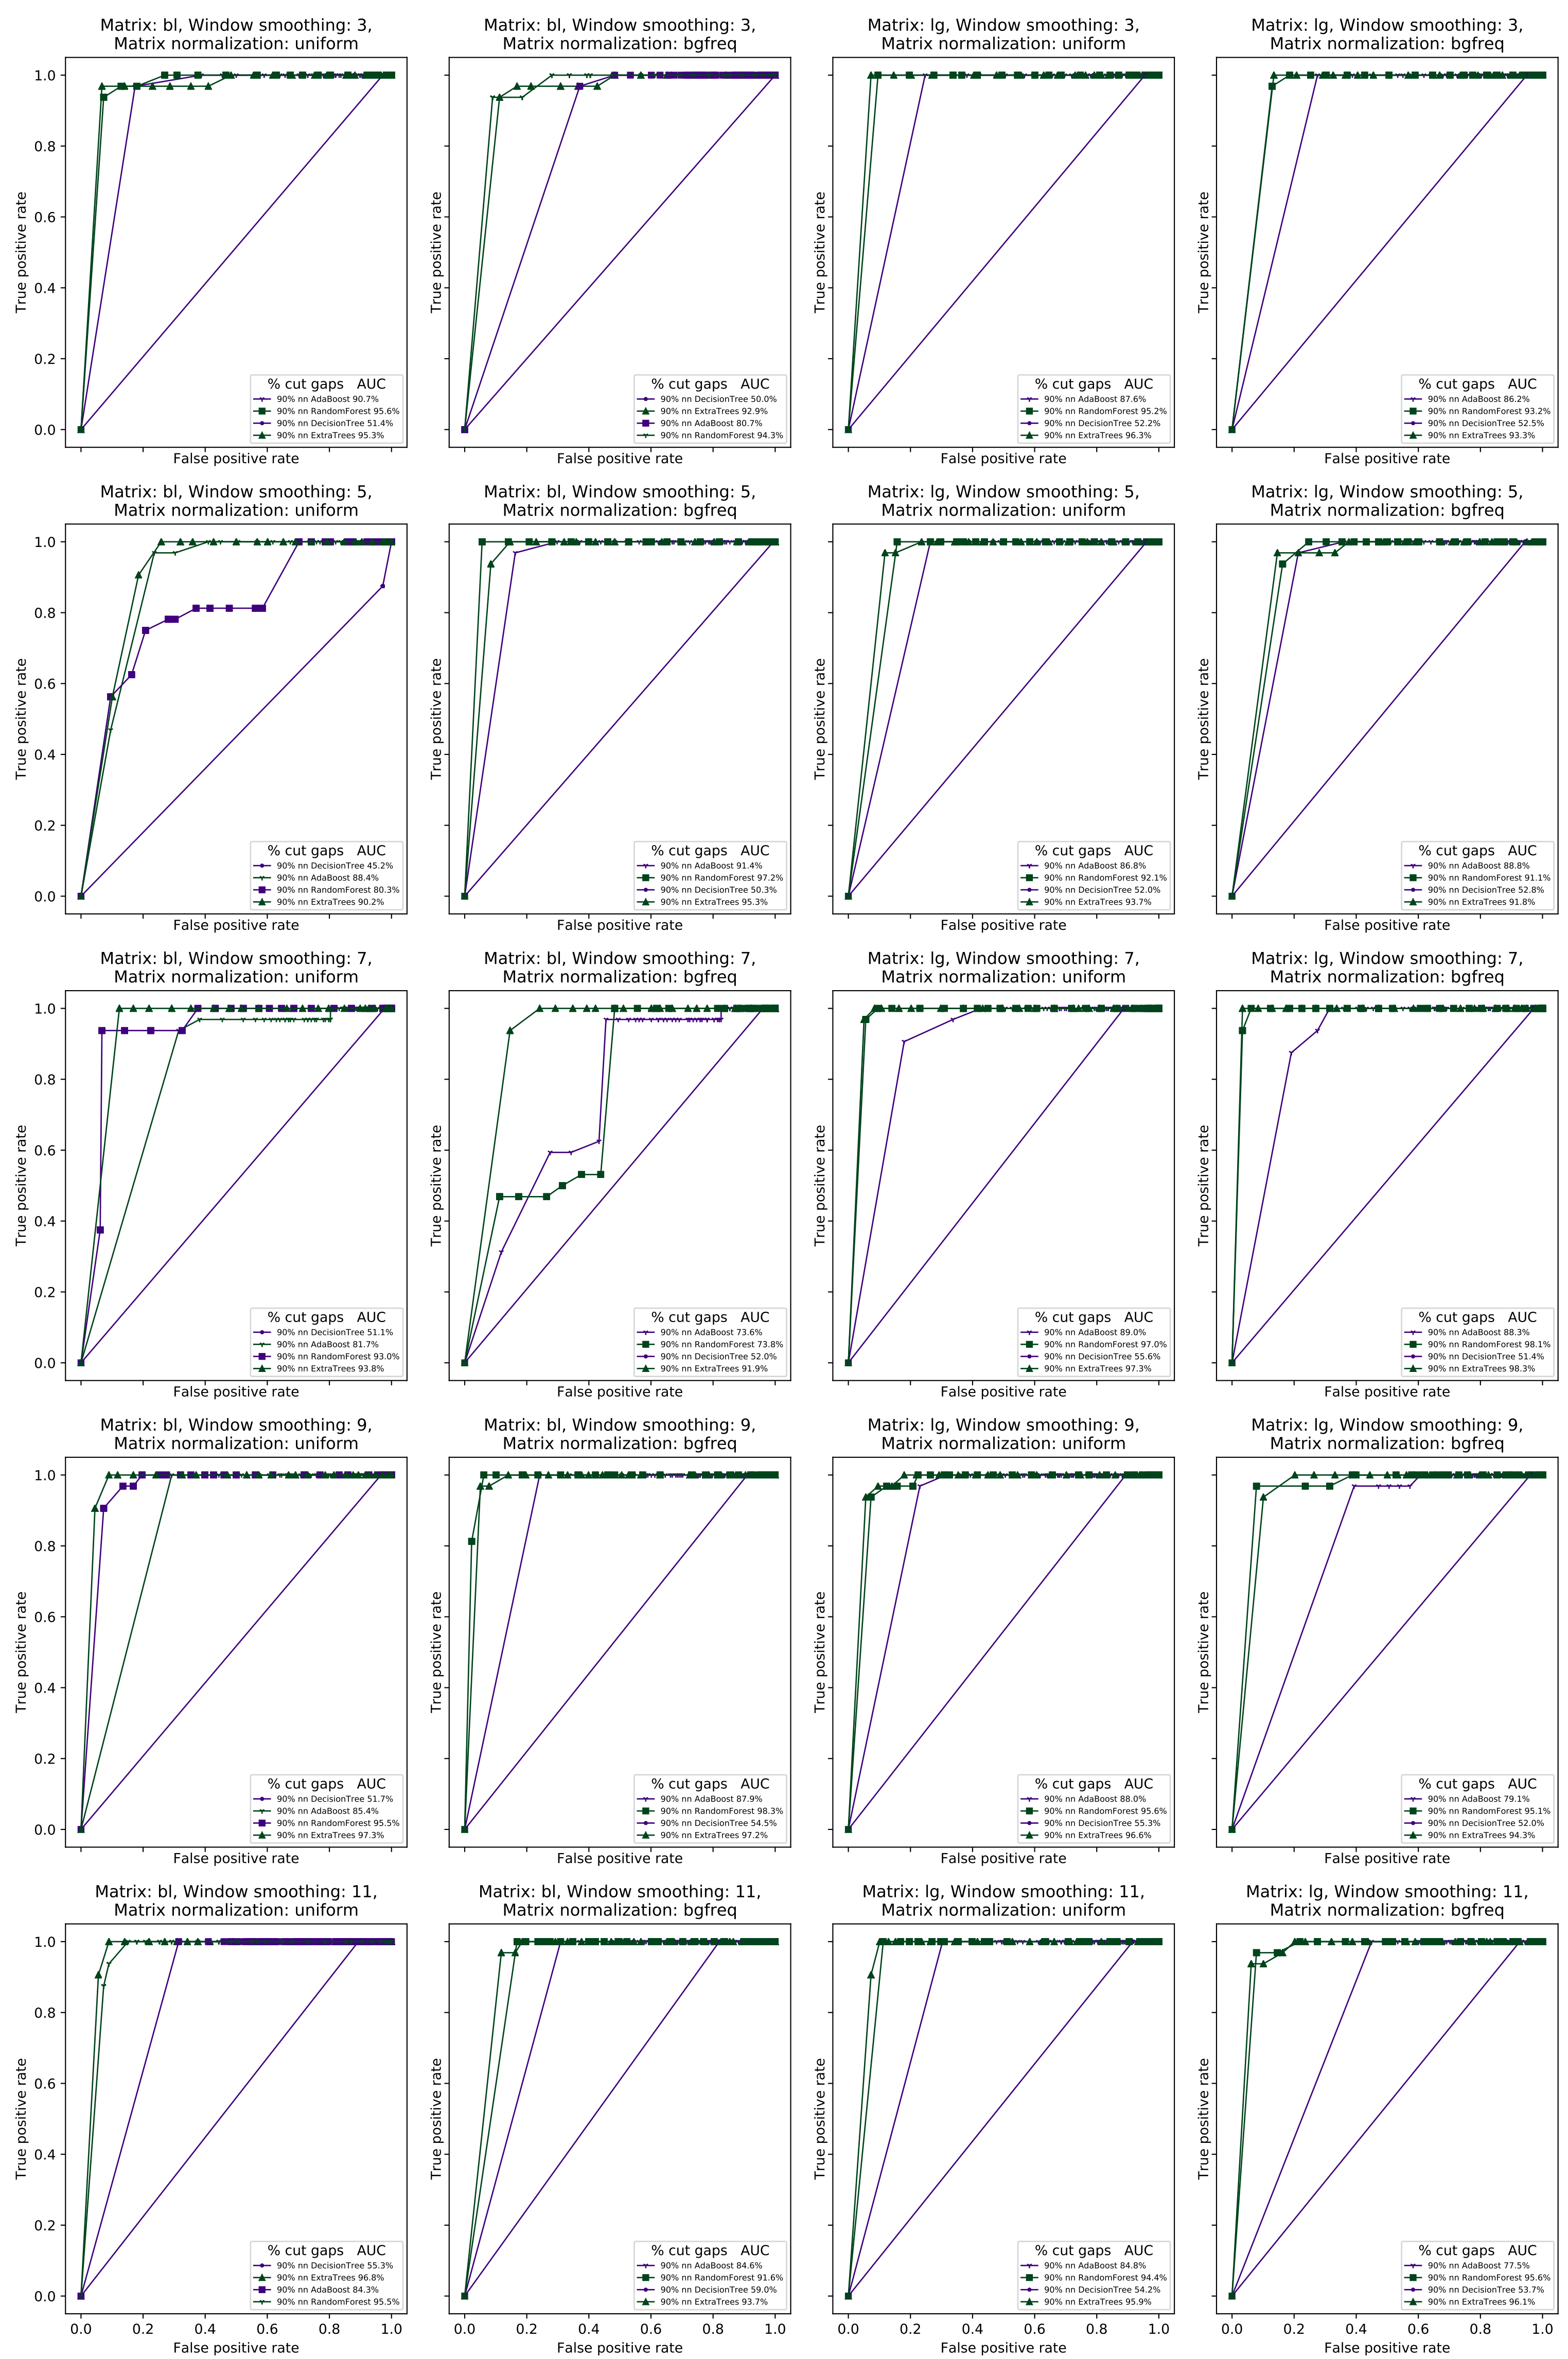



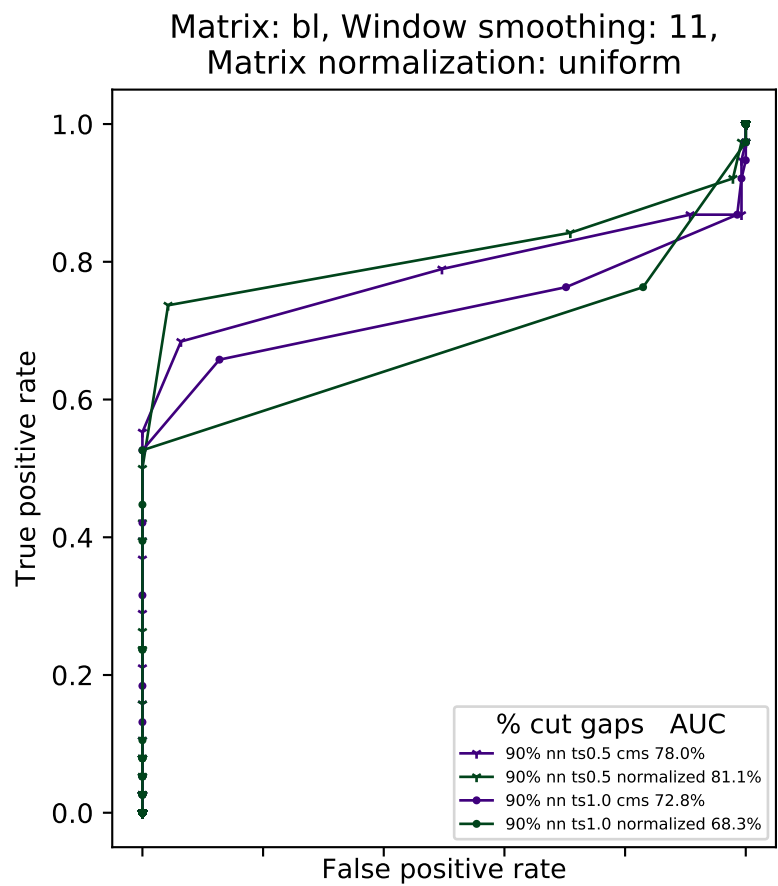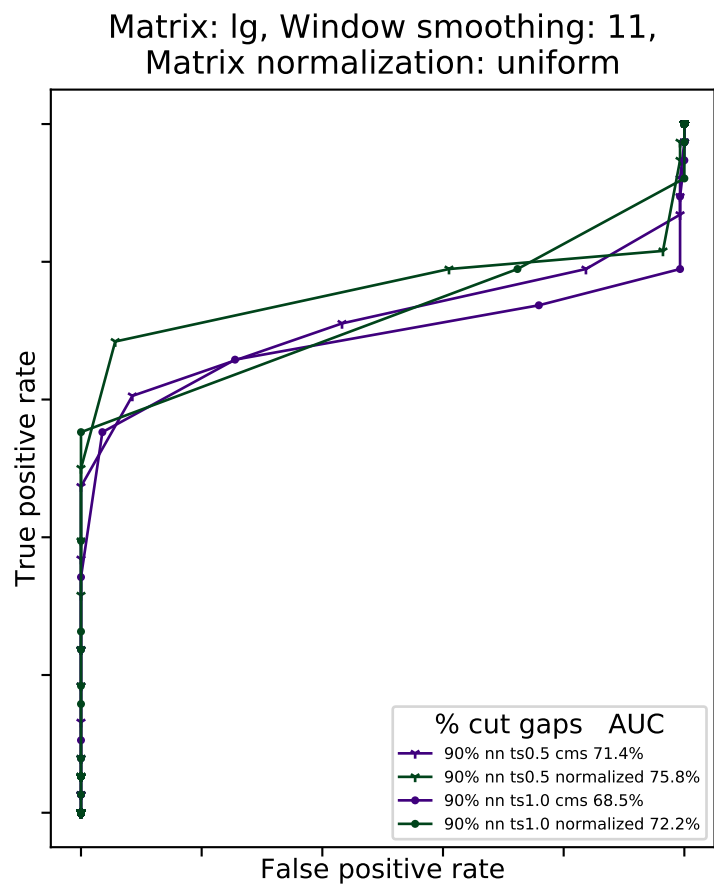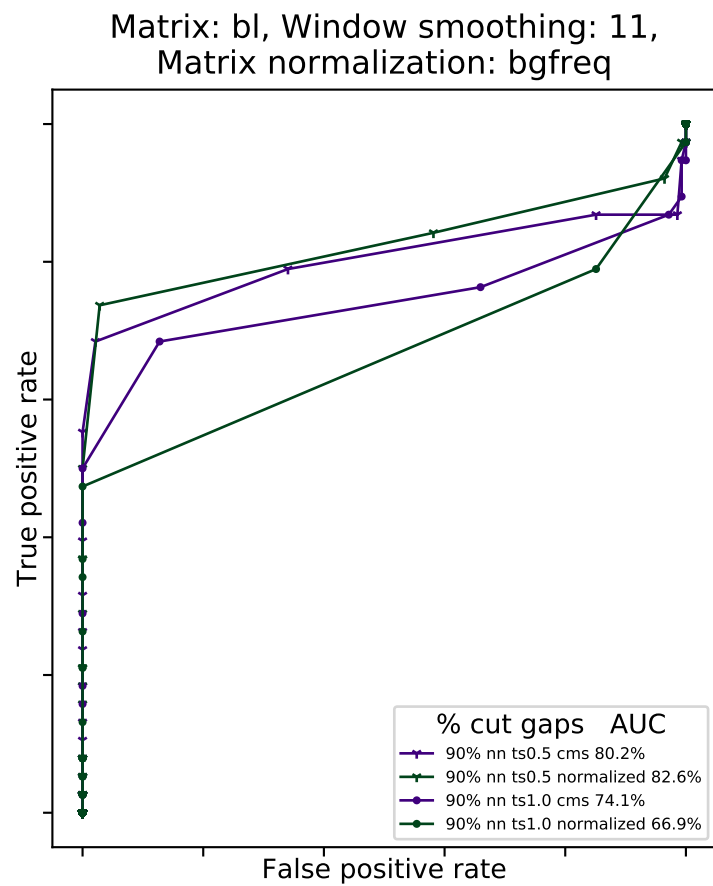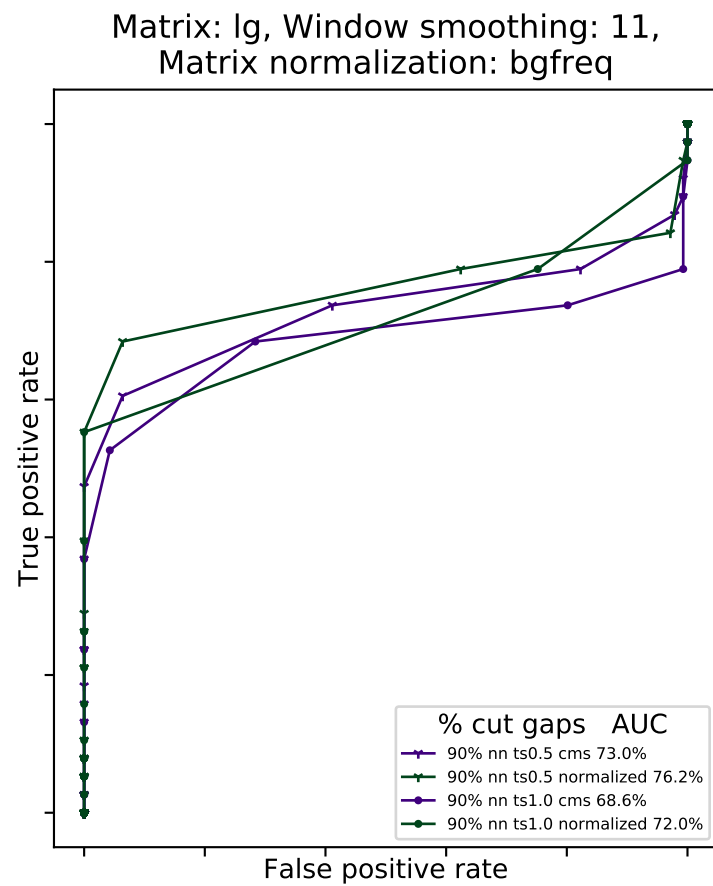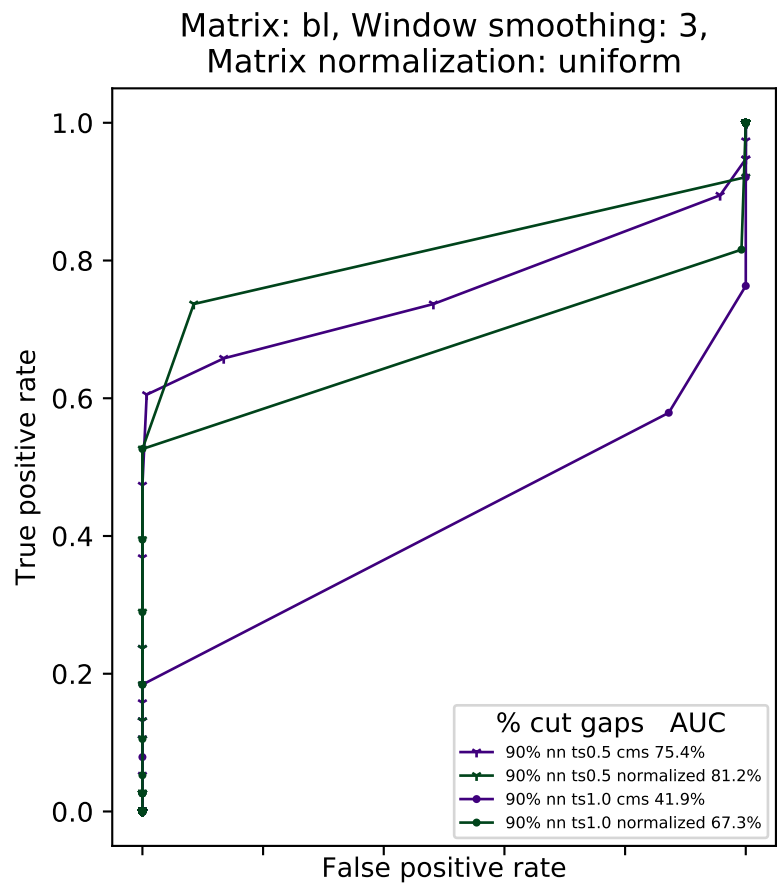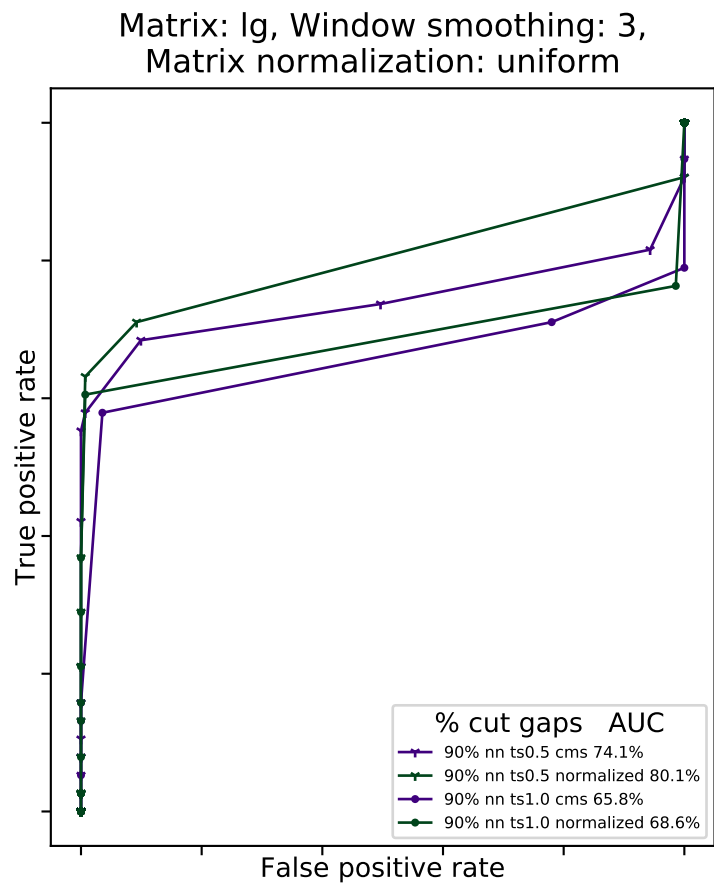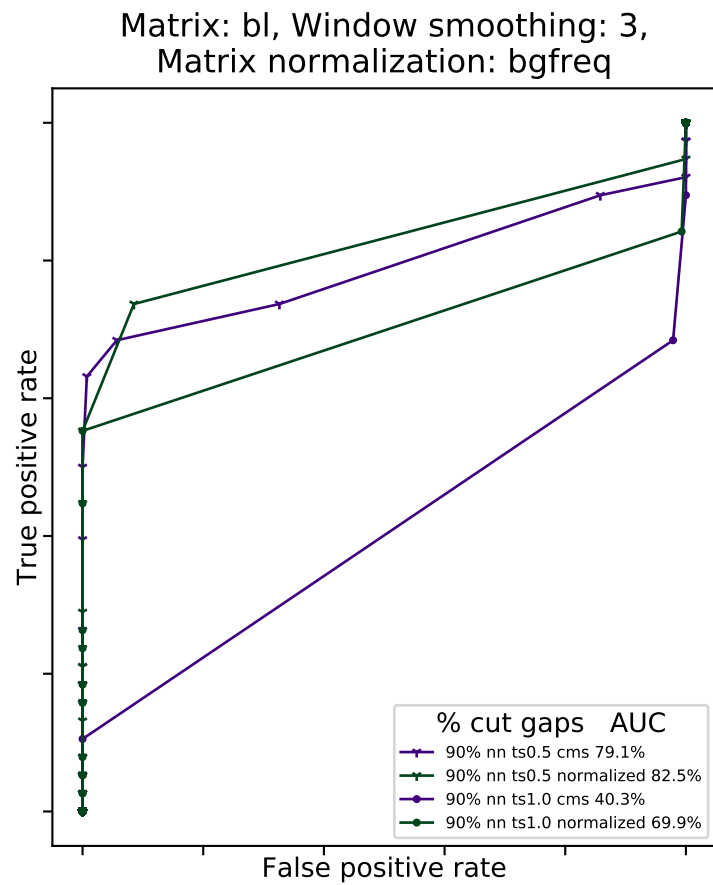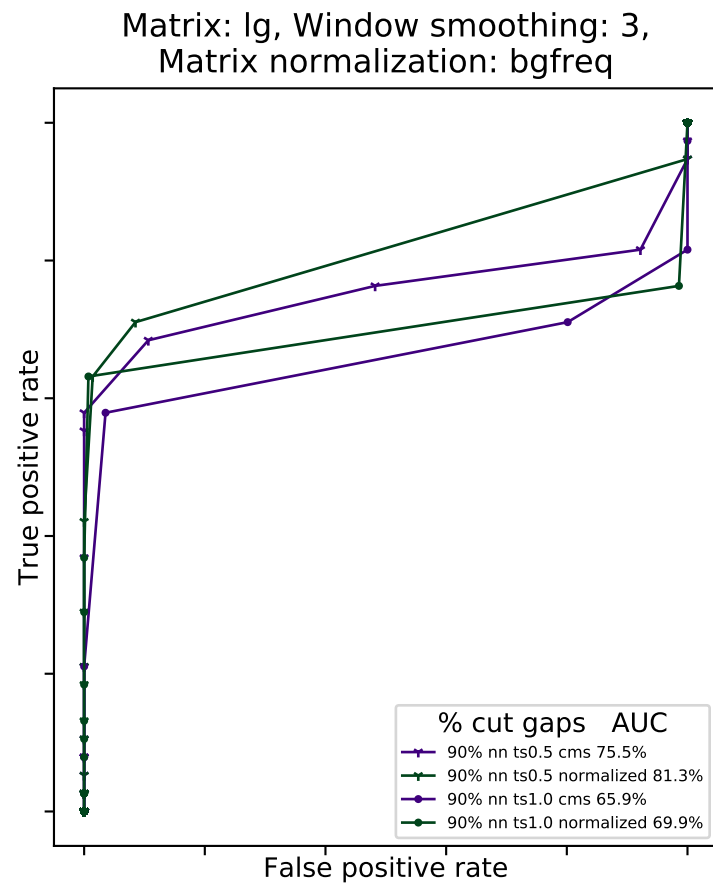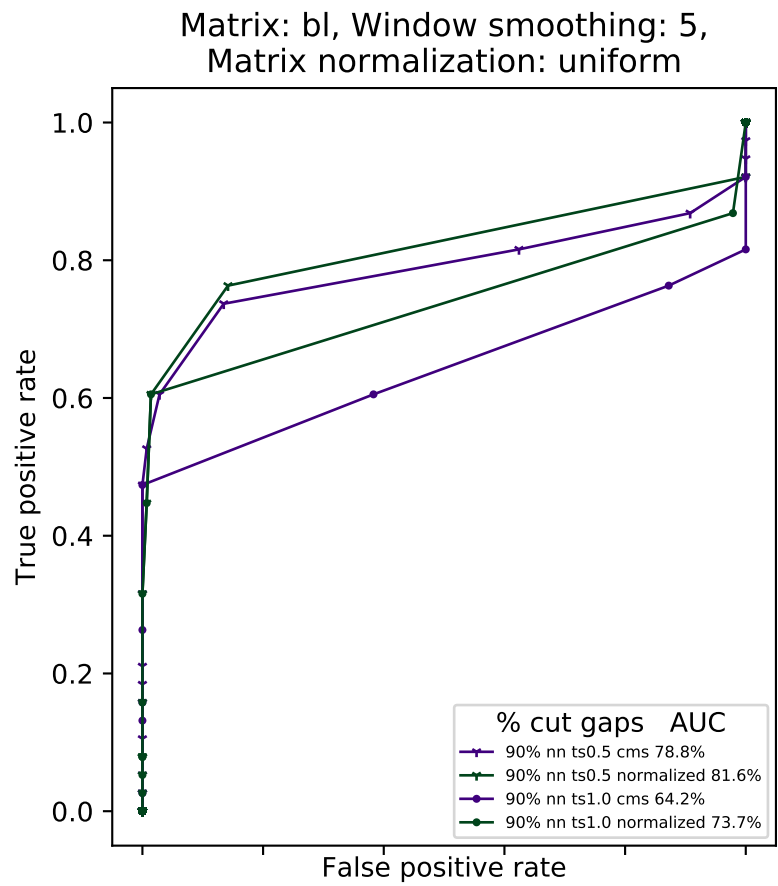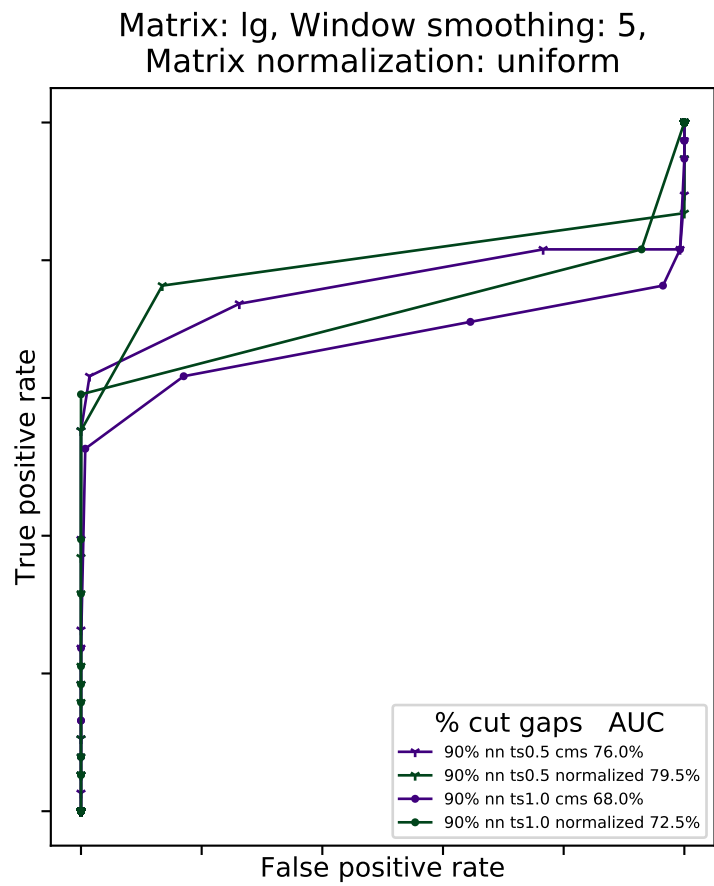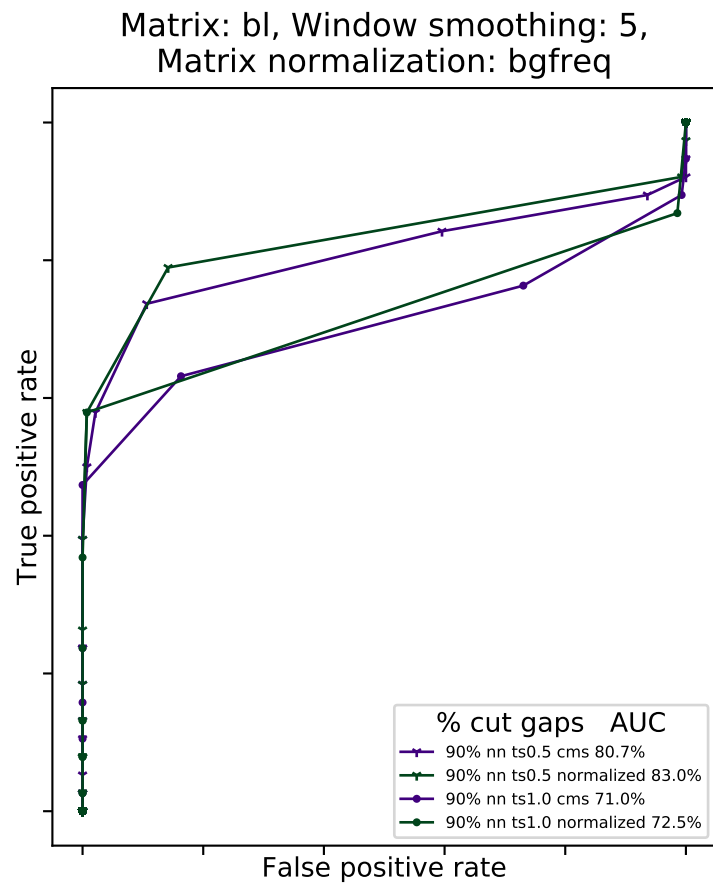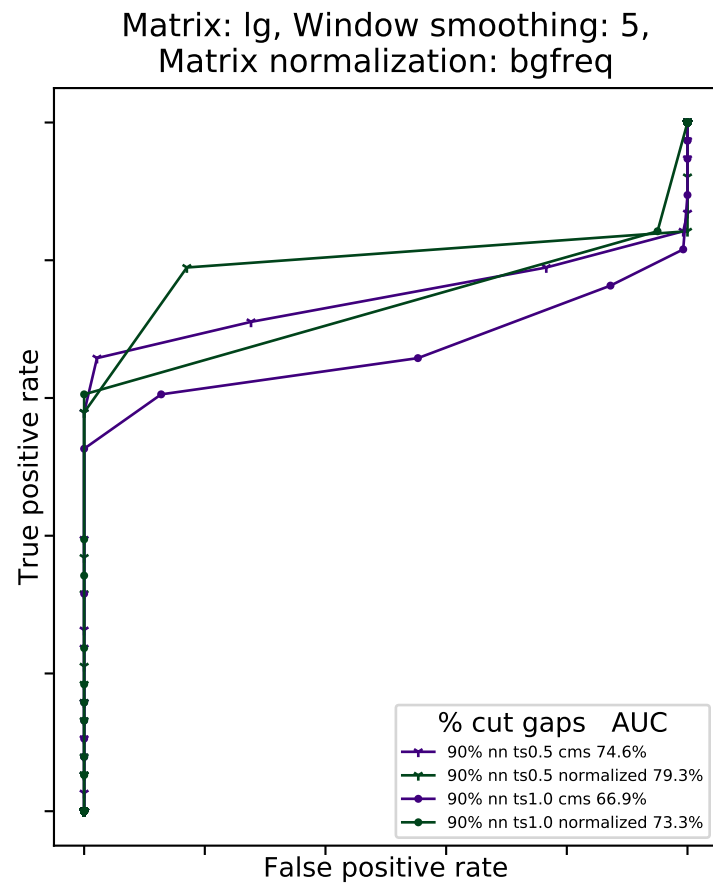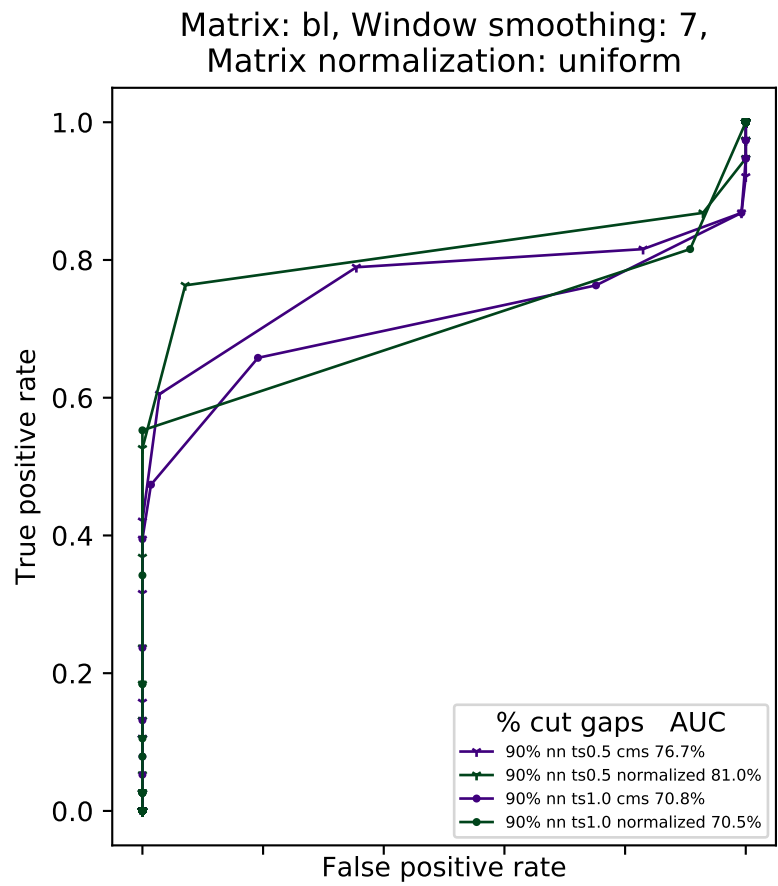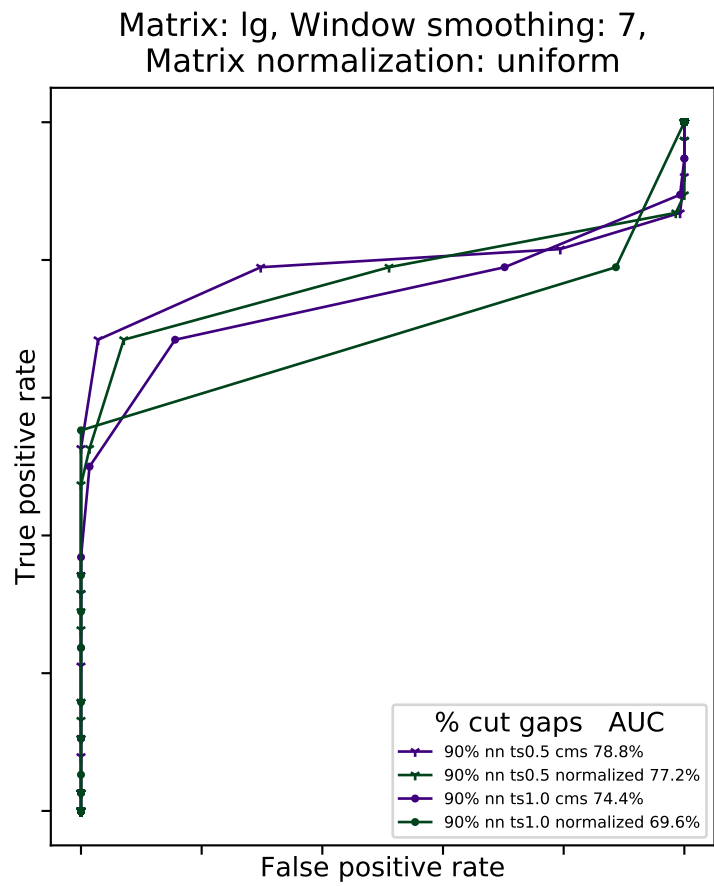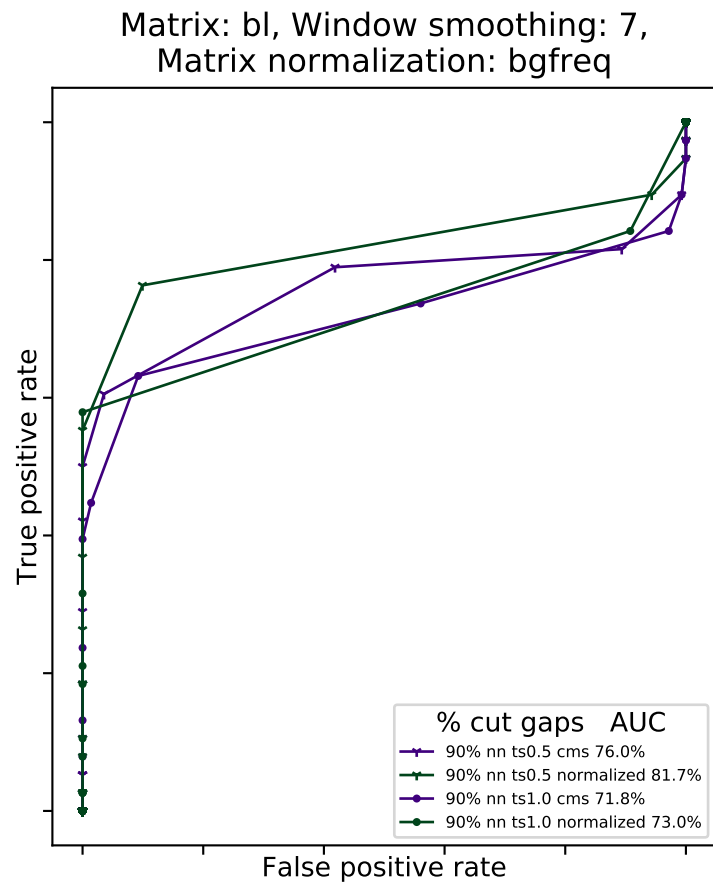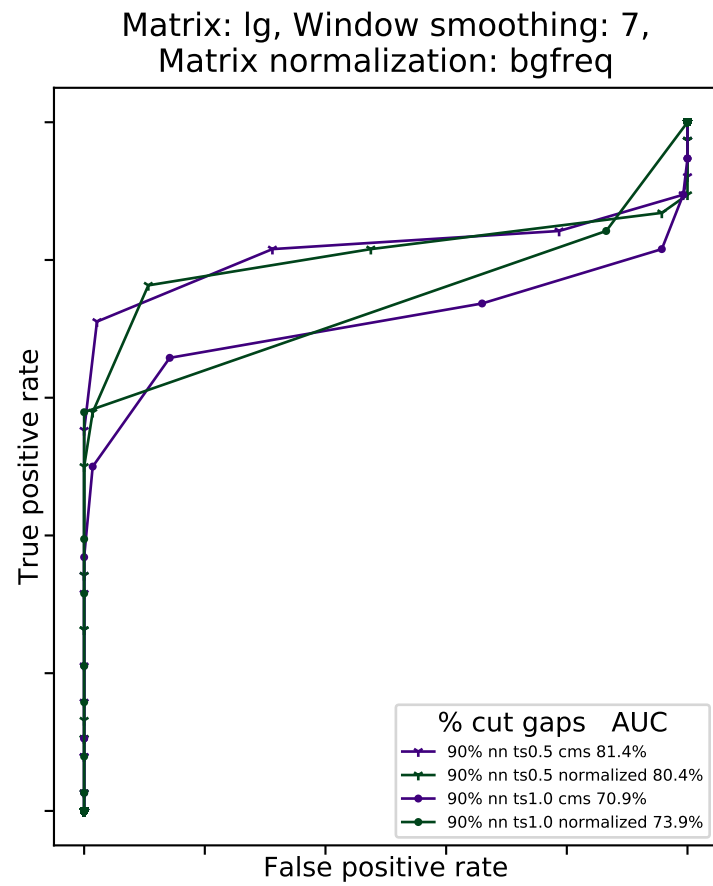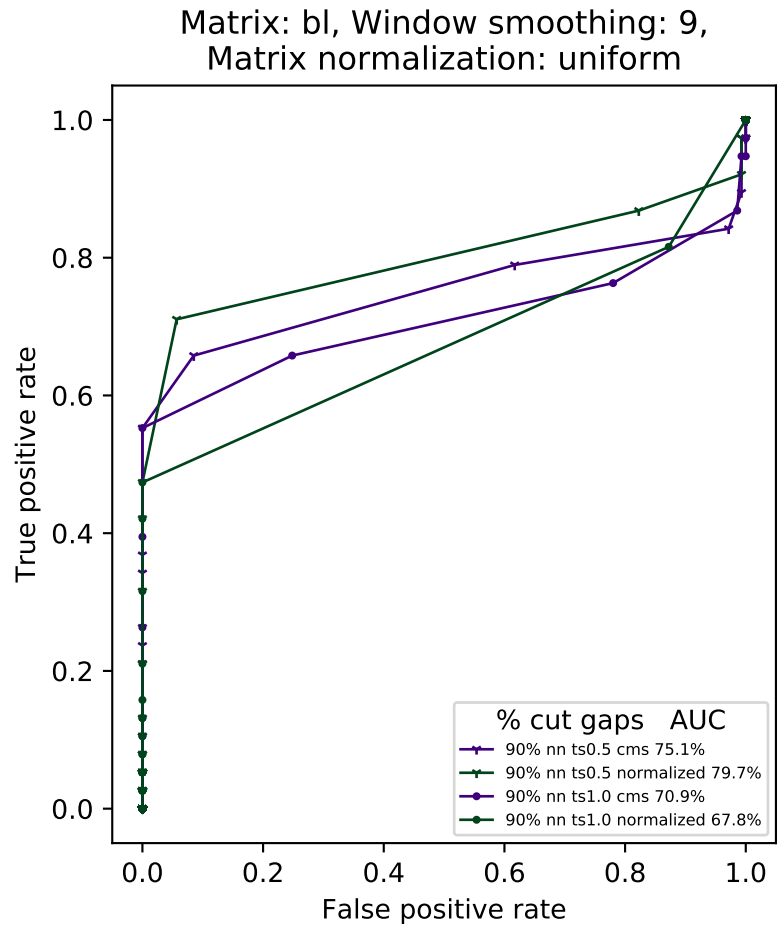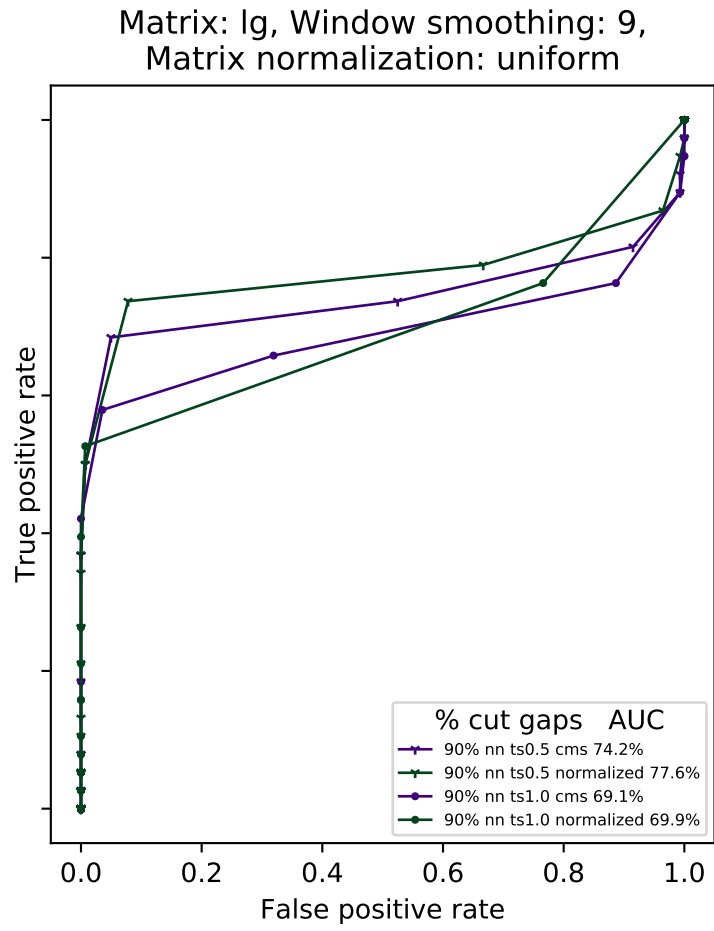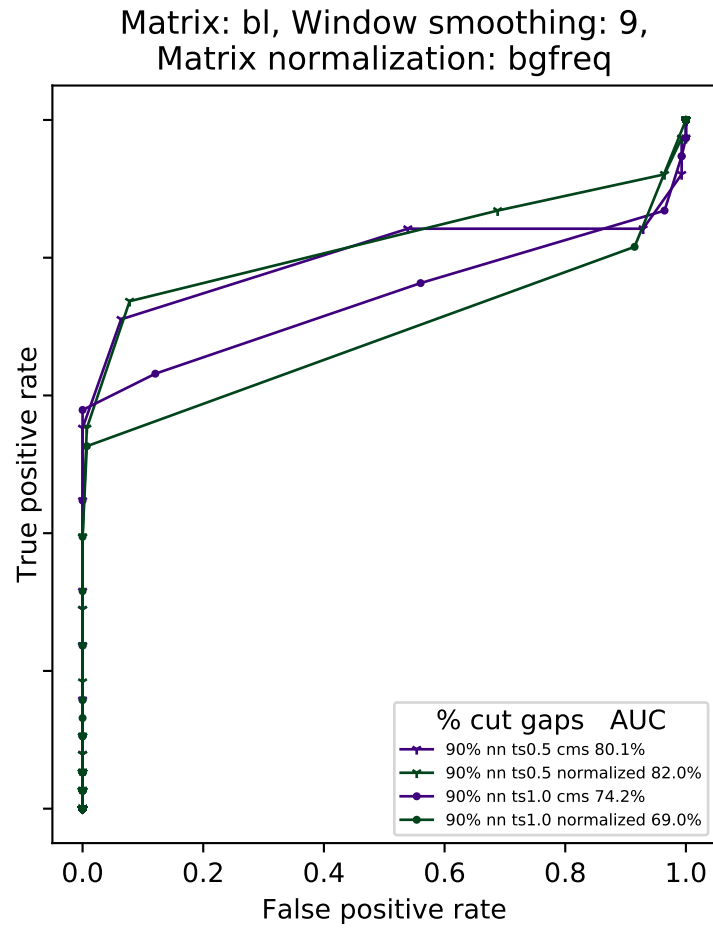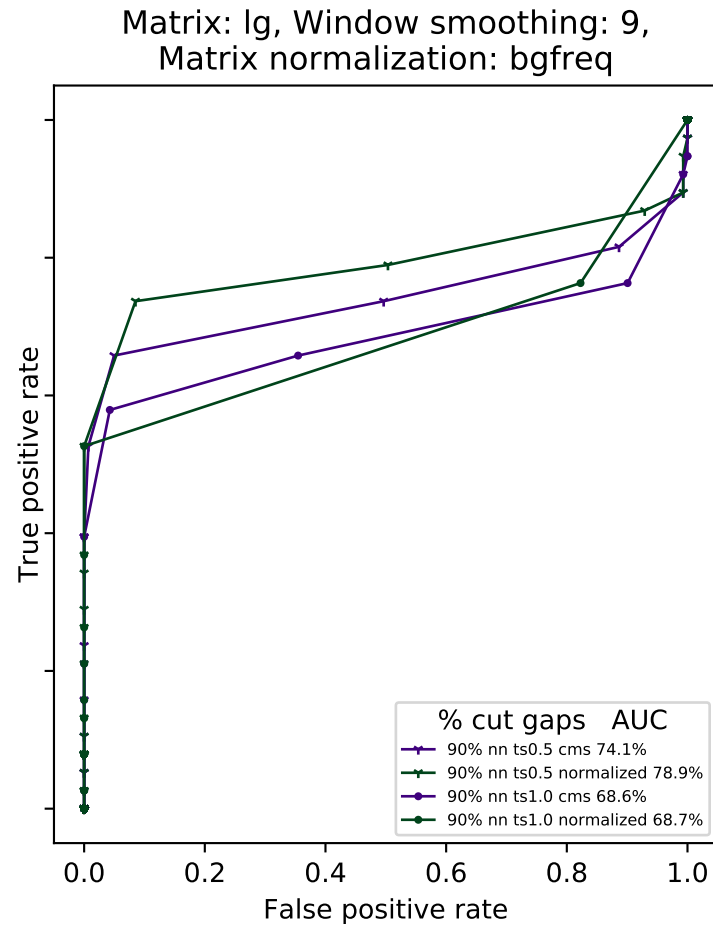



PRST vs BBS

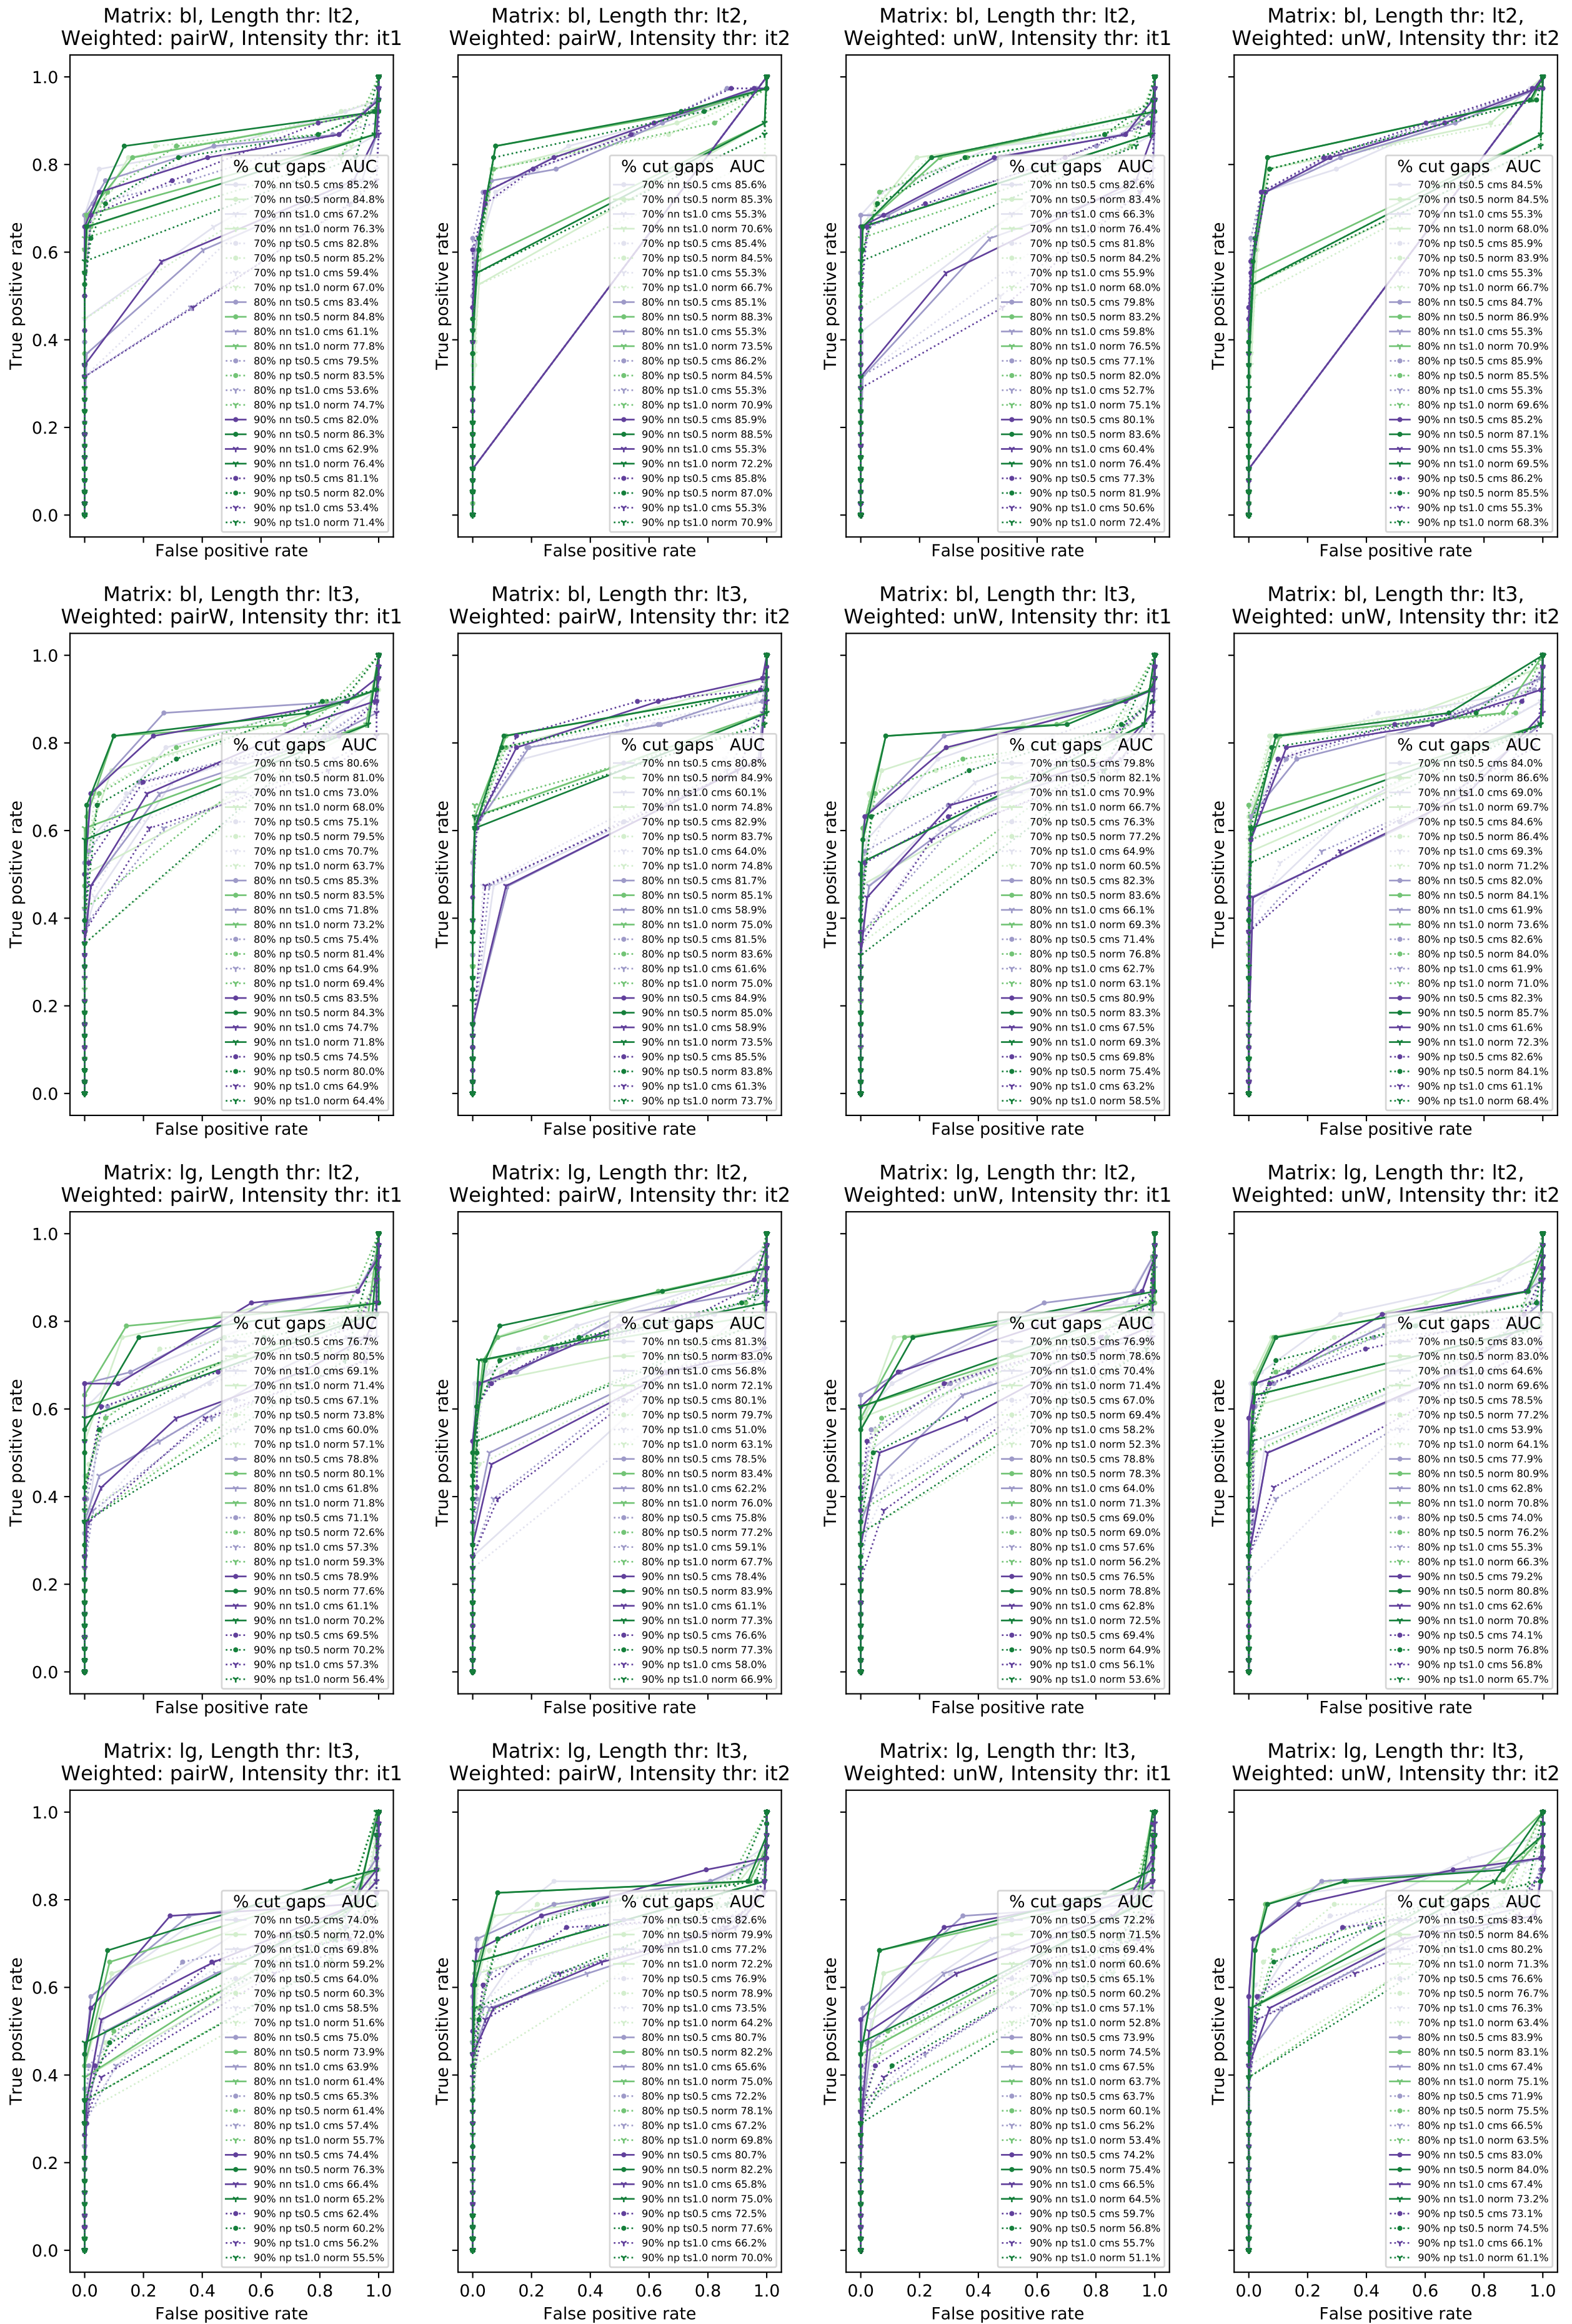



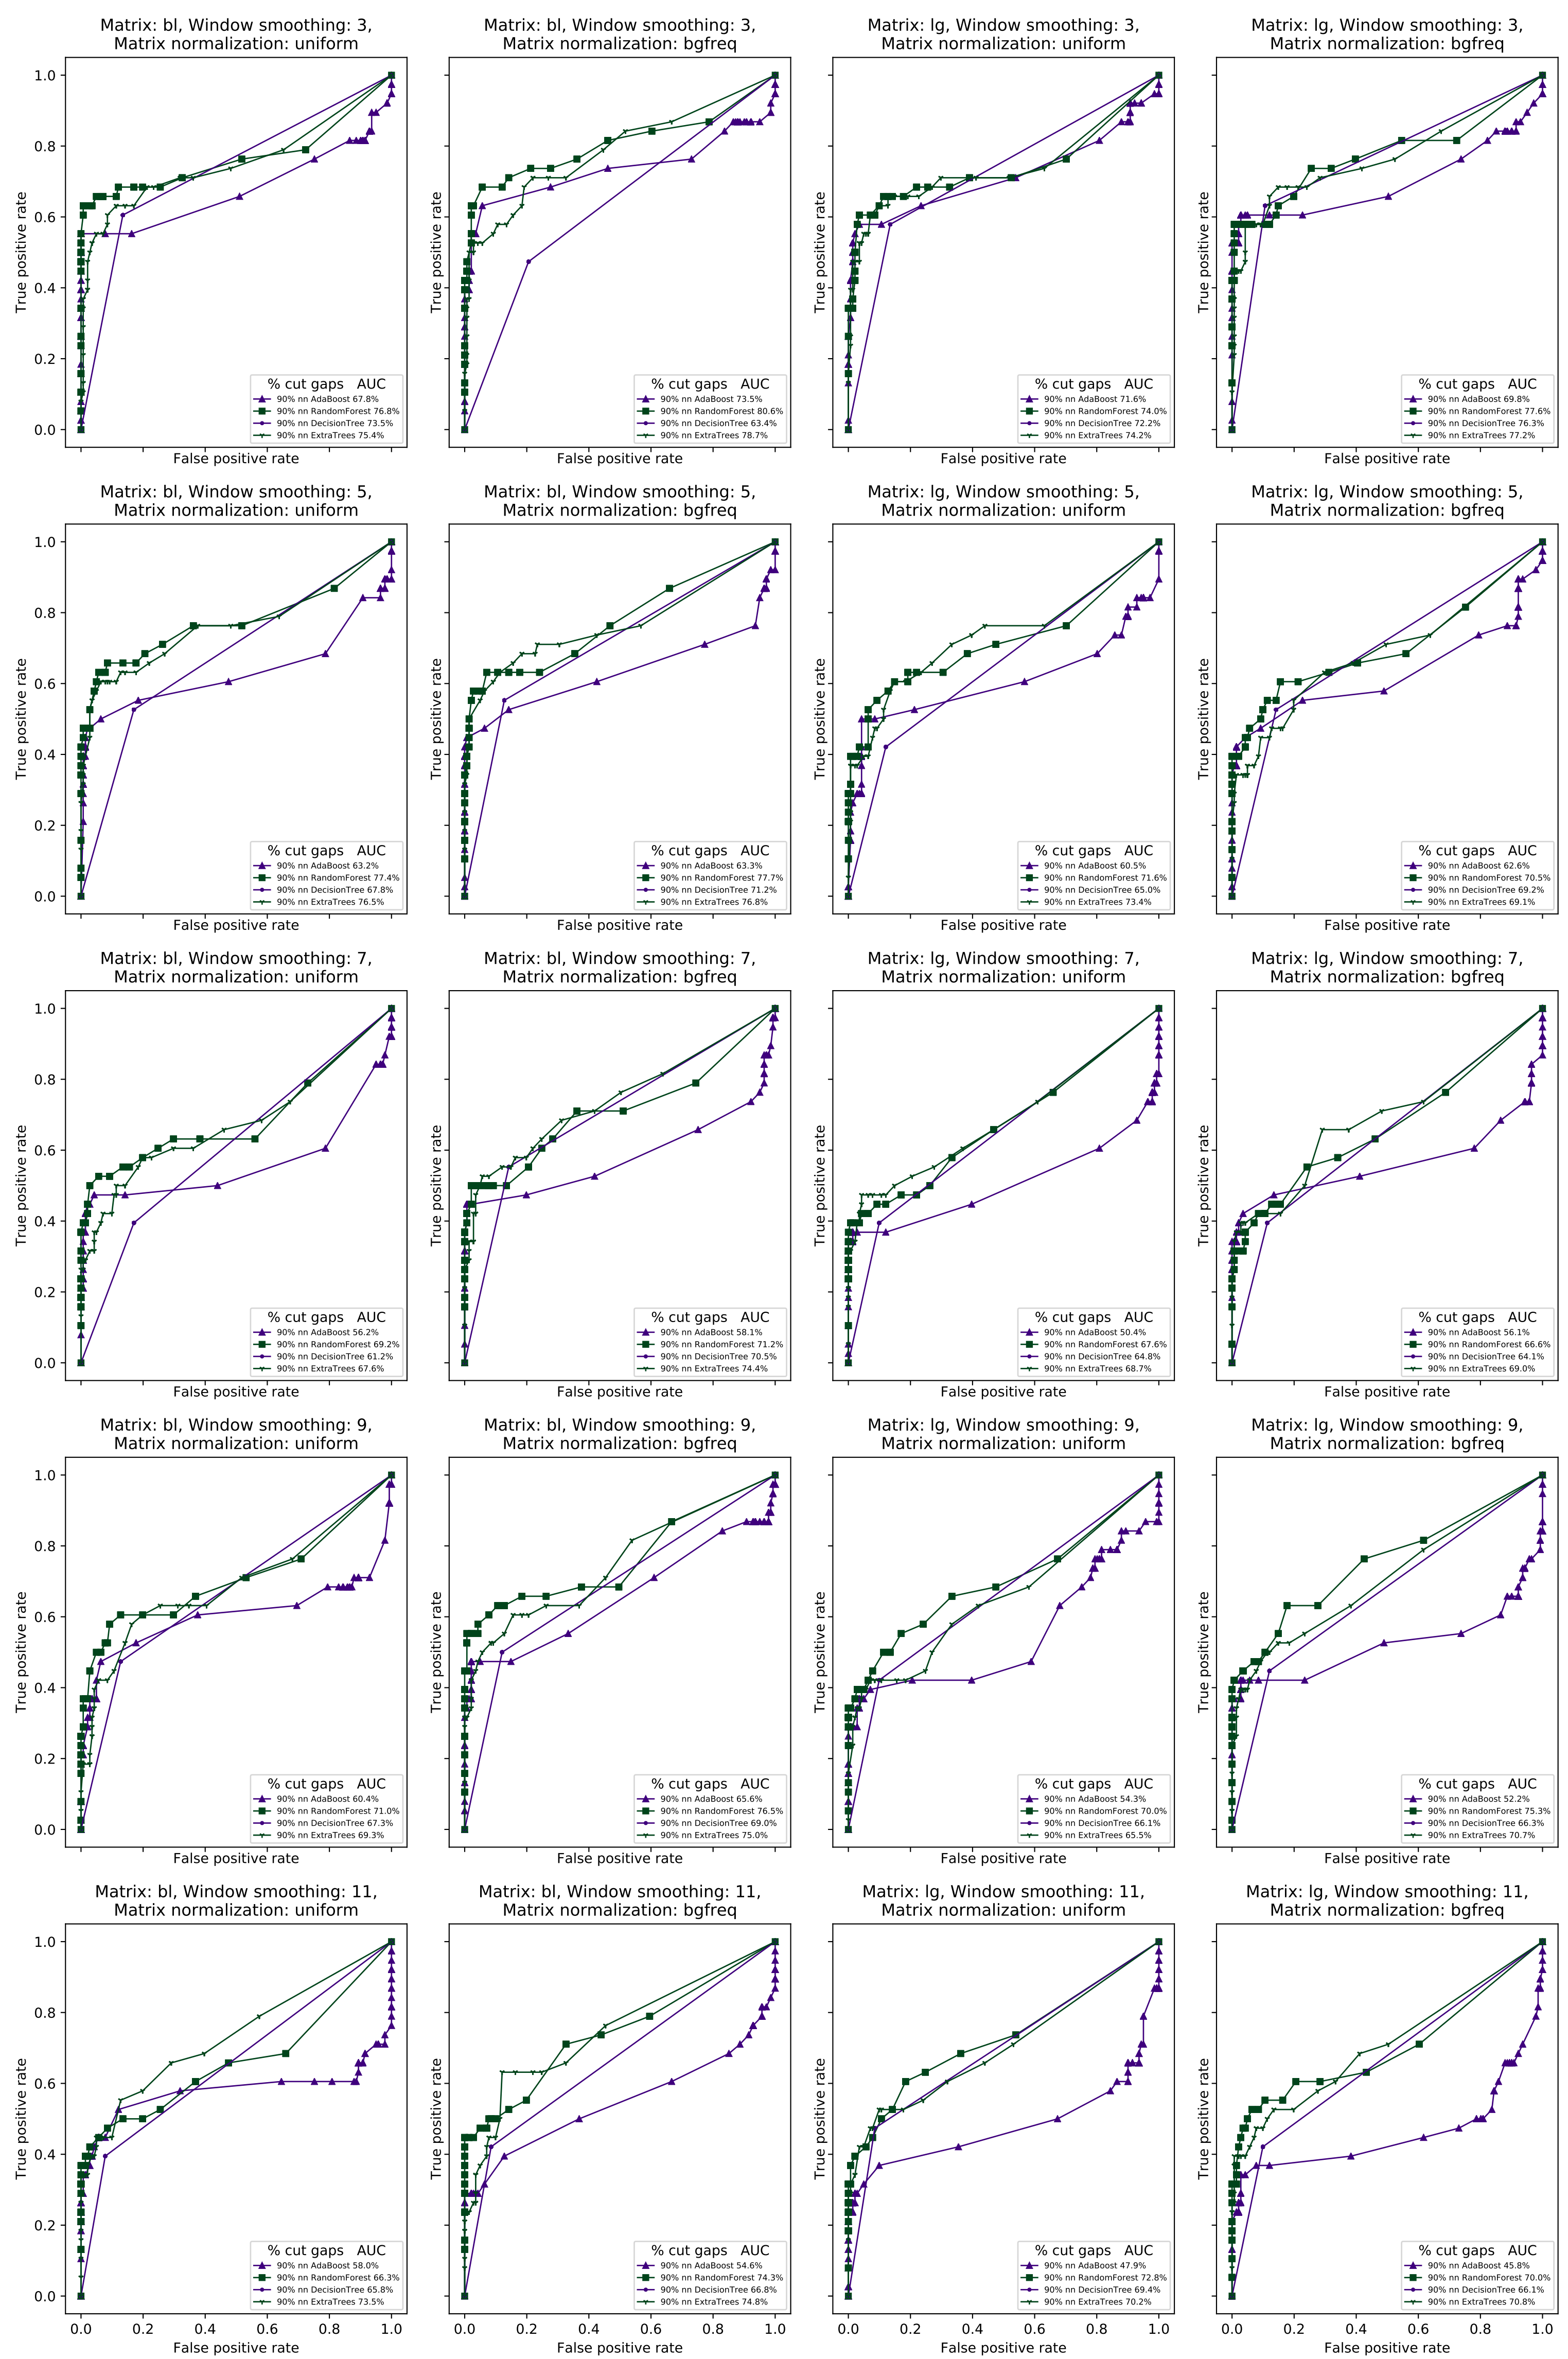





# PRST vs IND

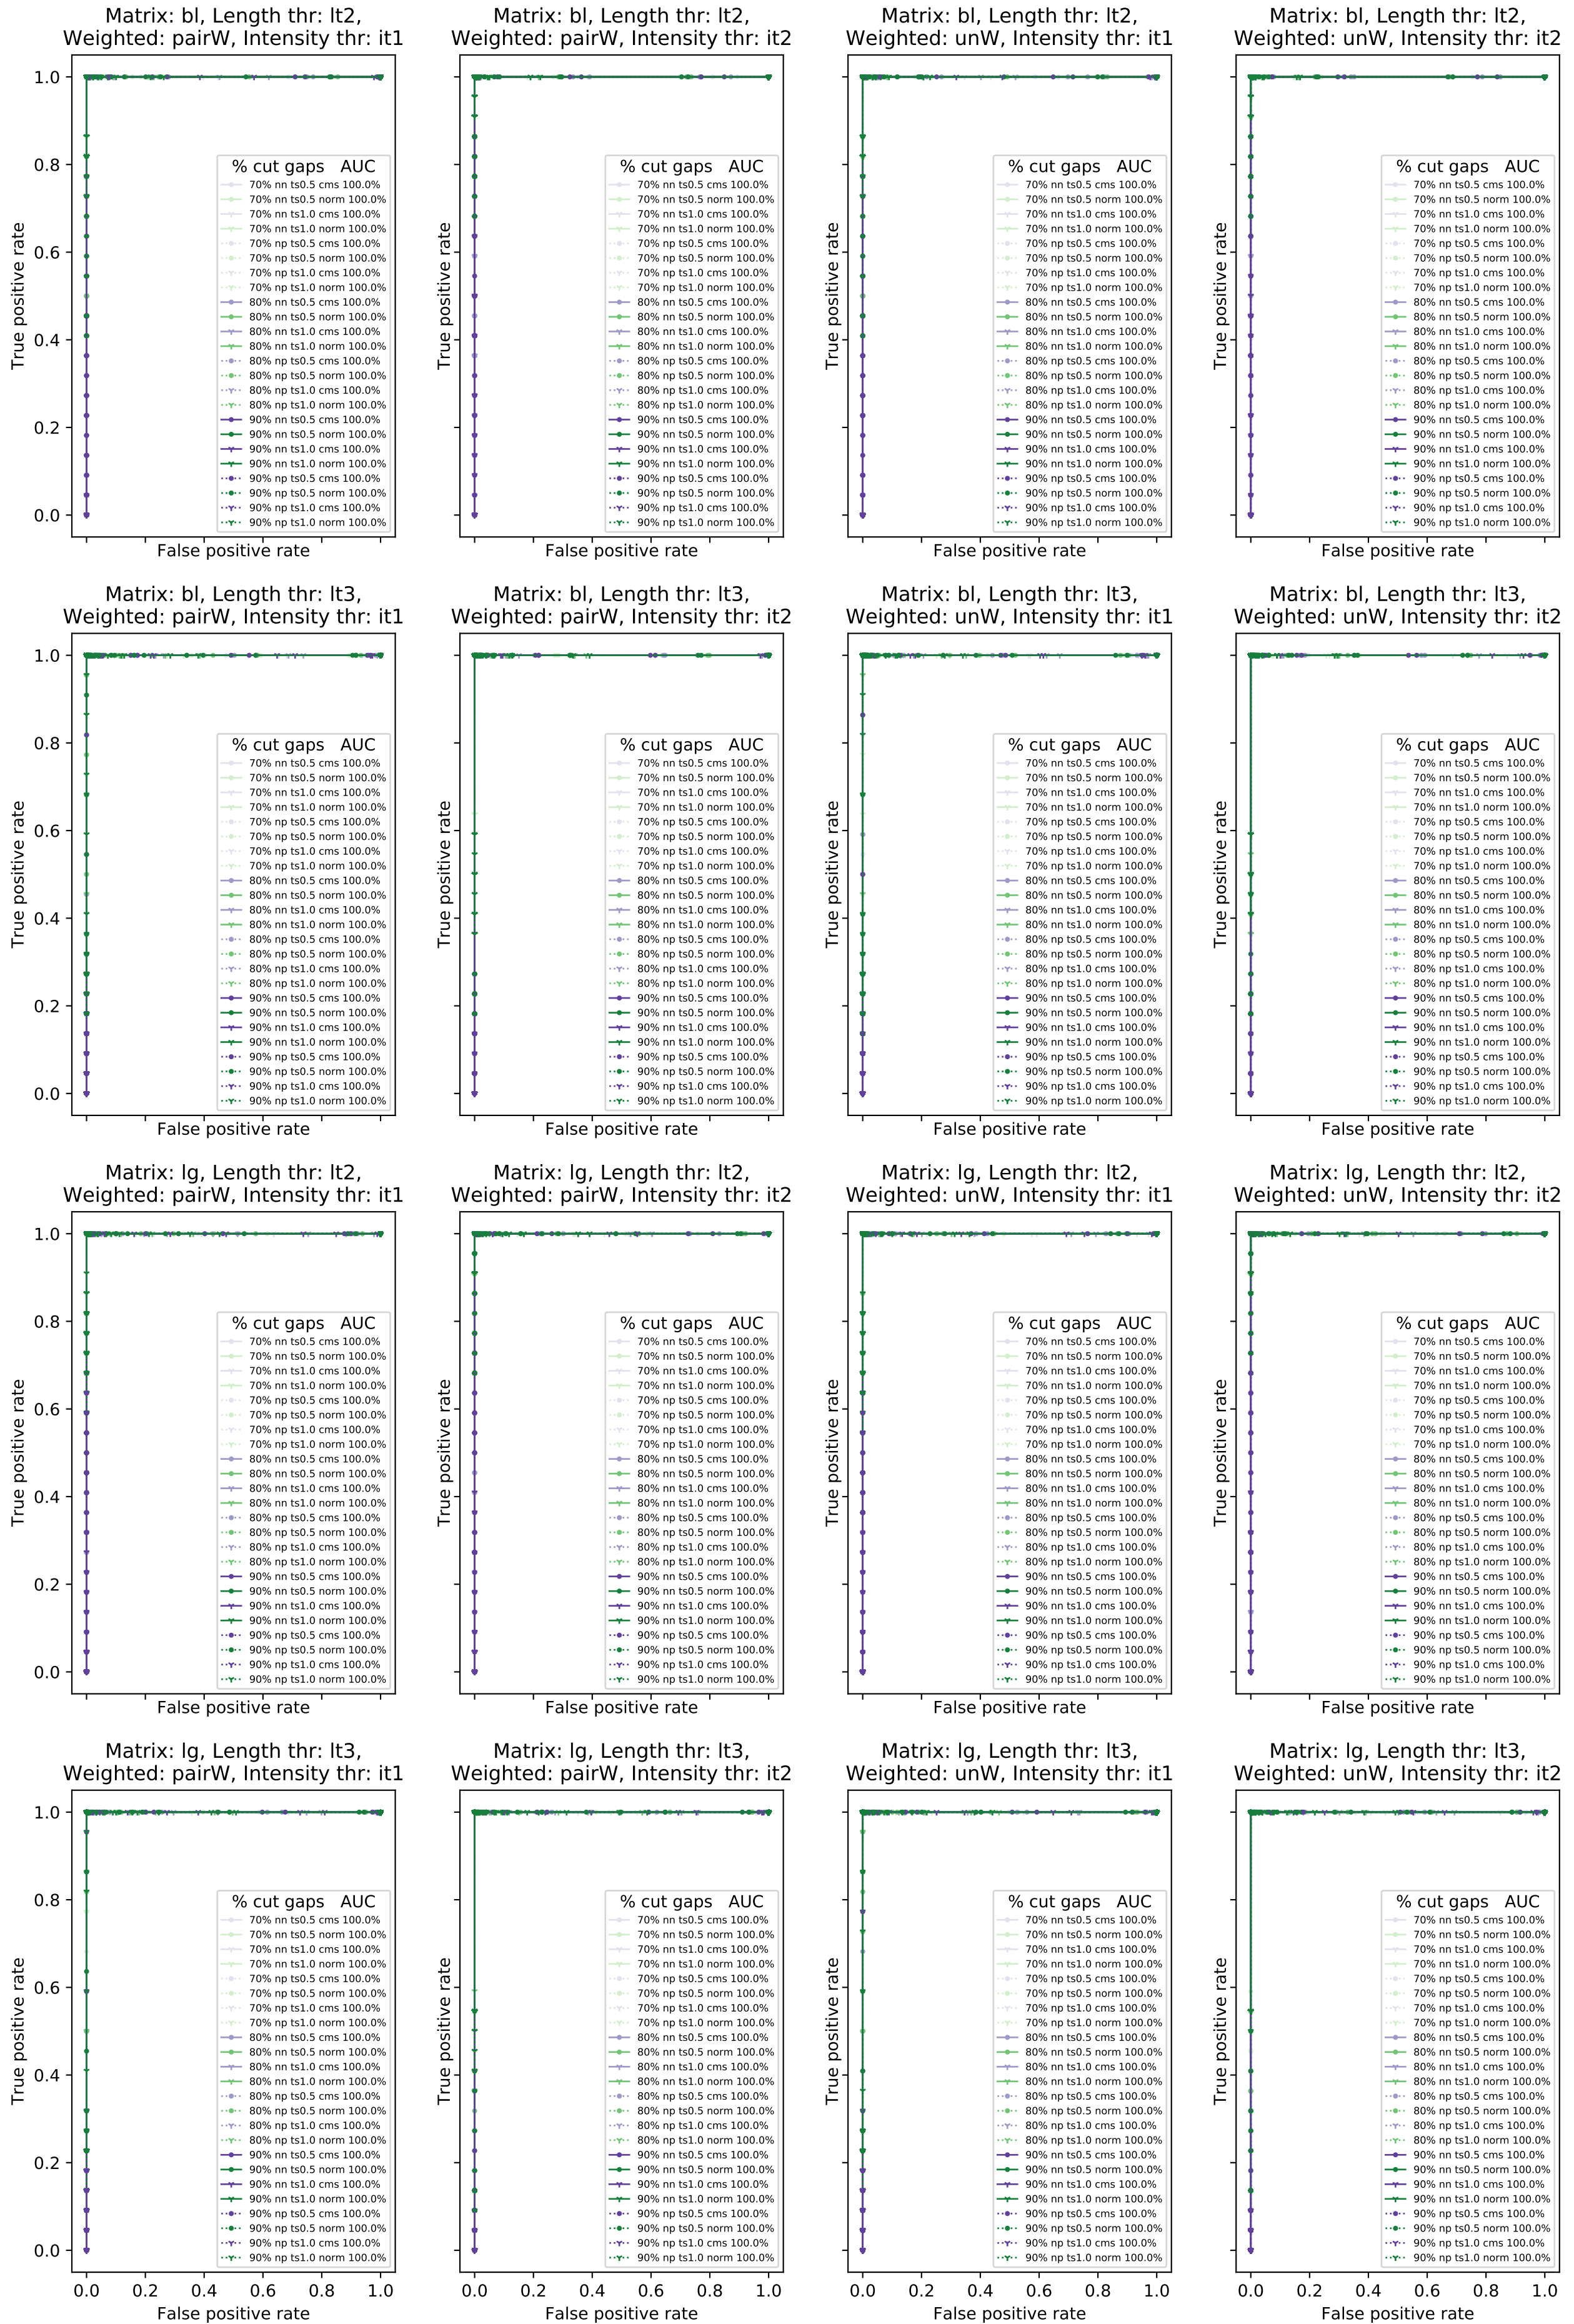

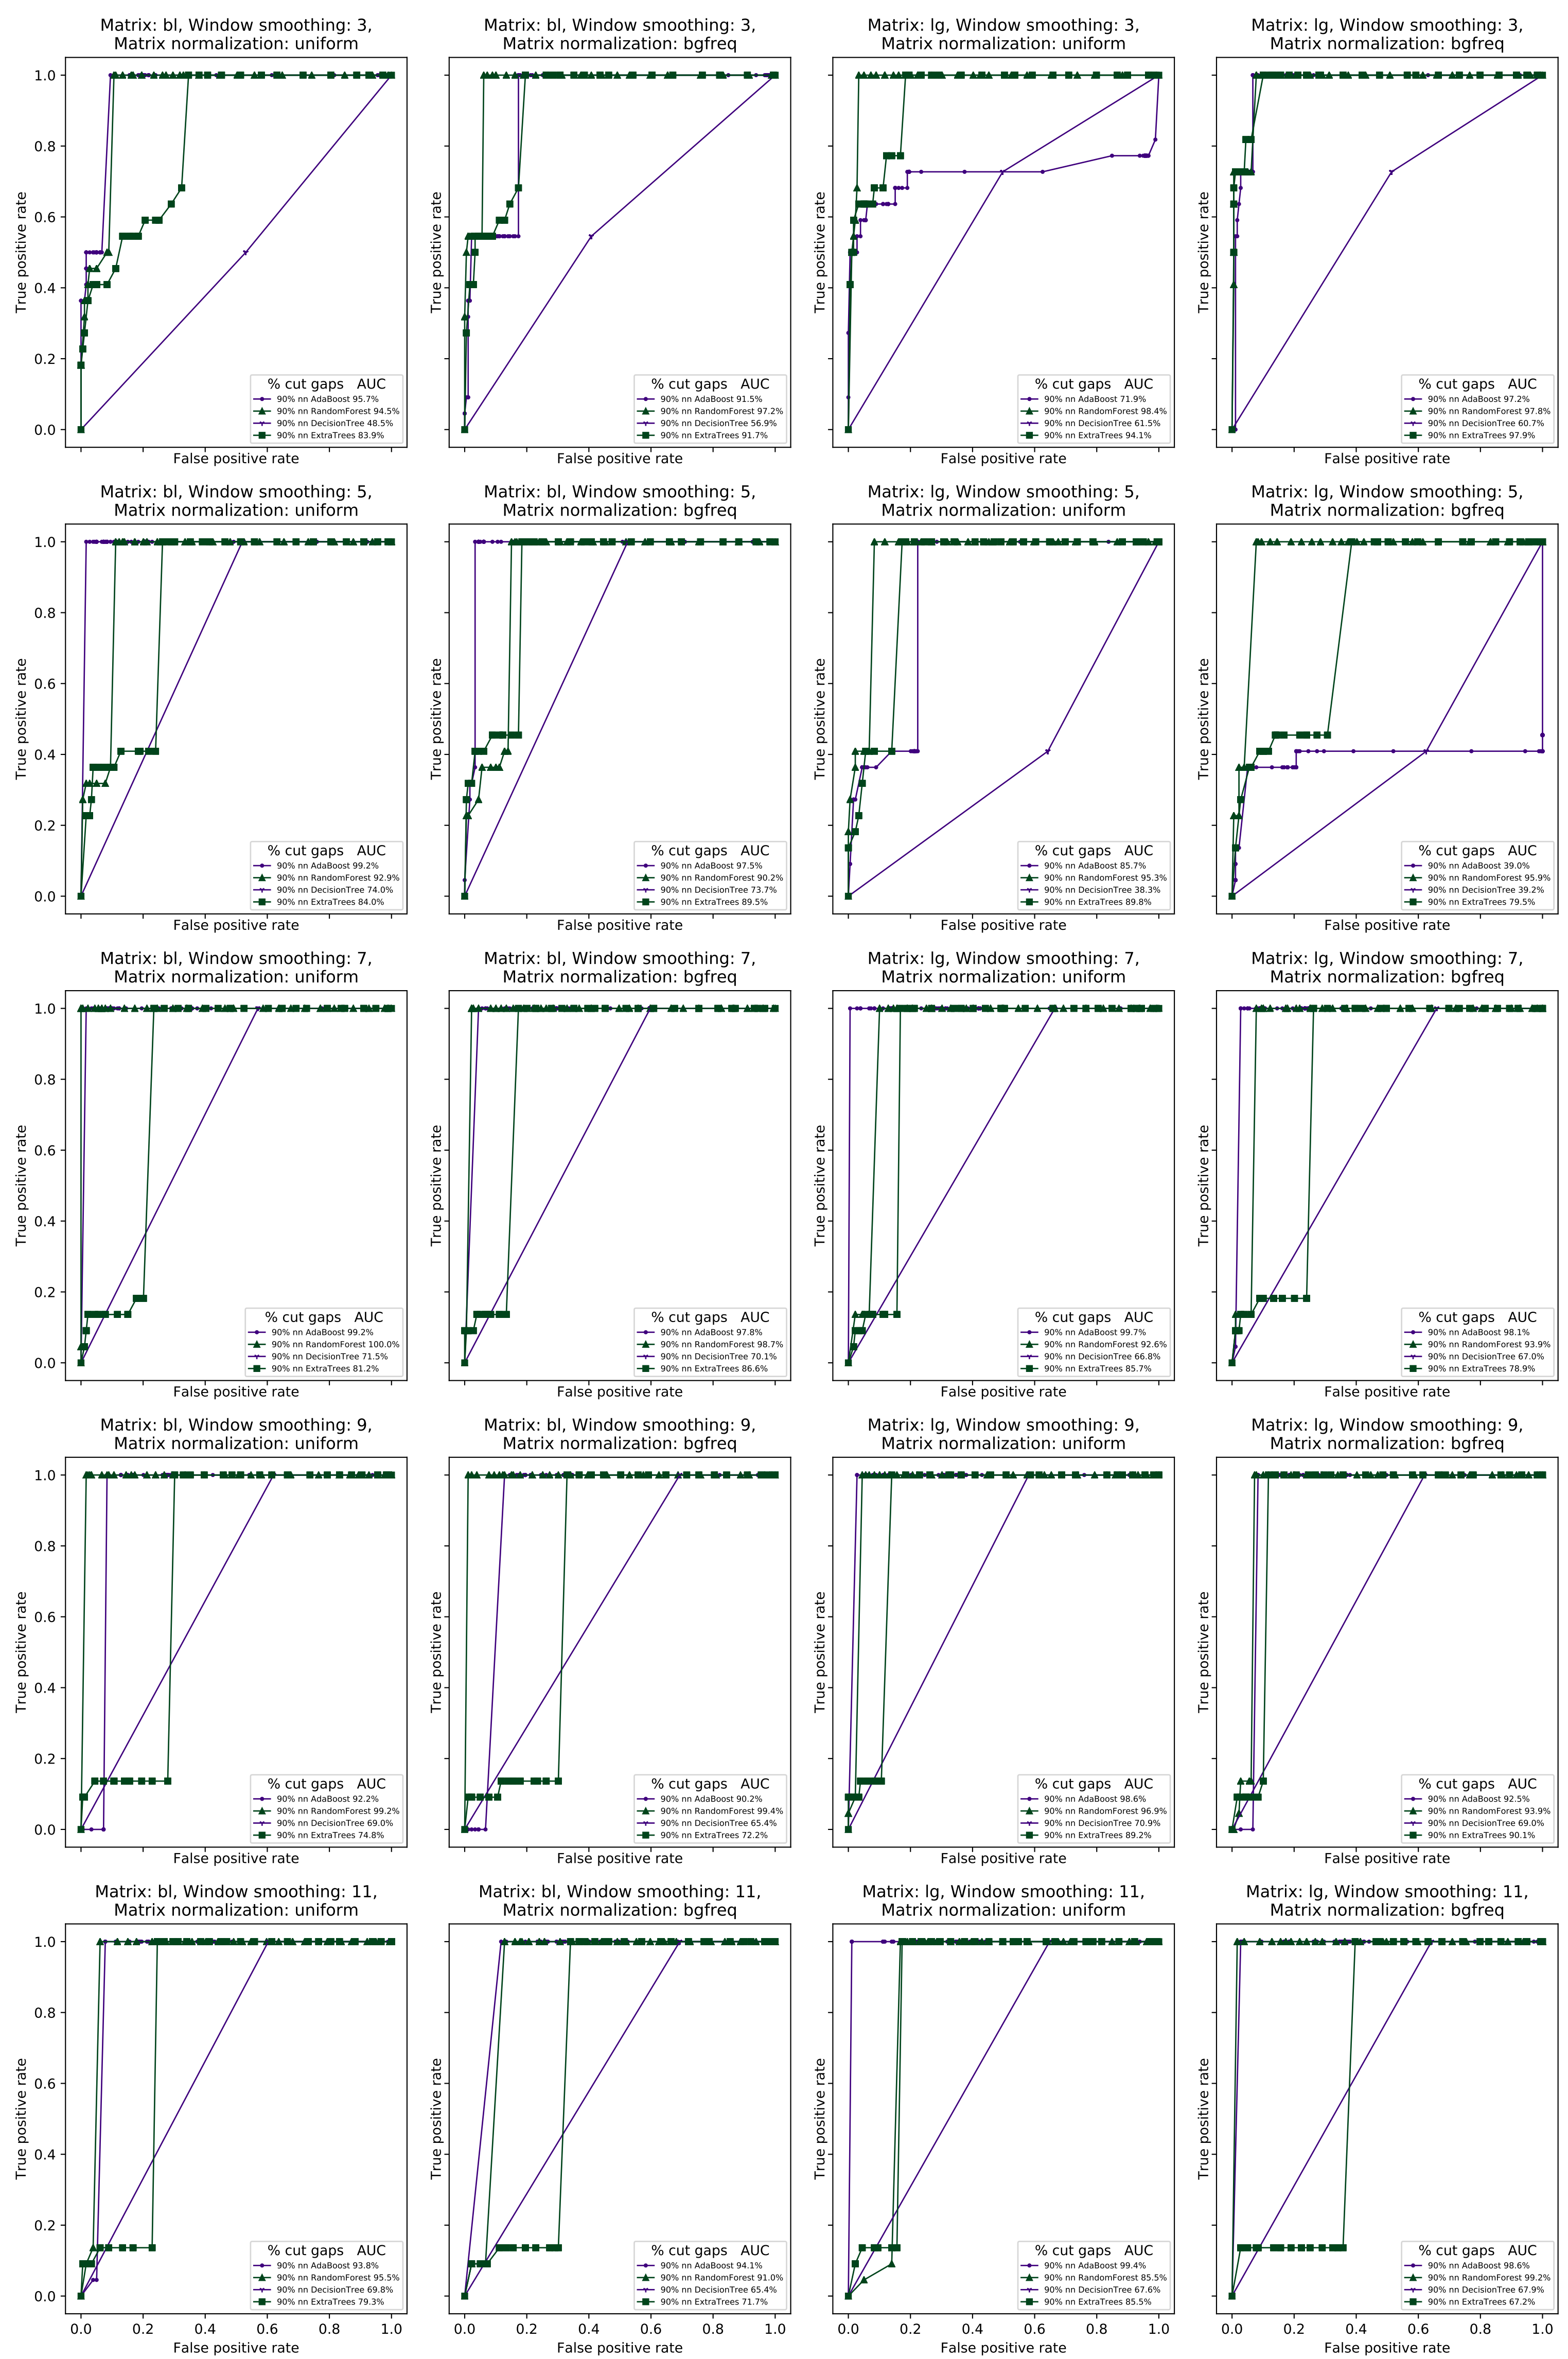



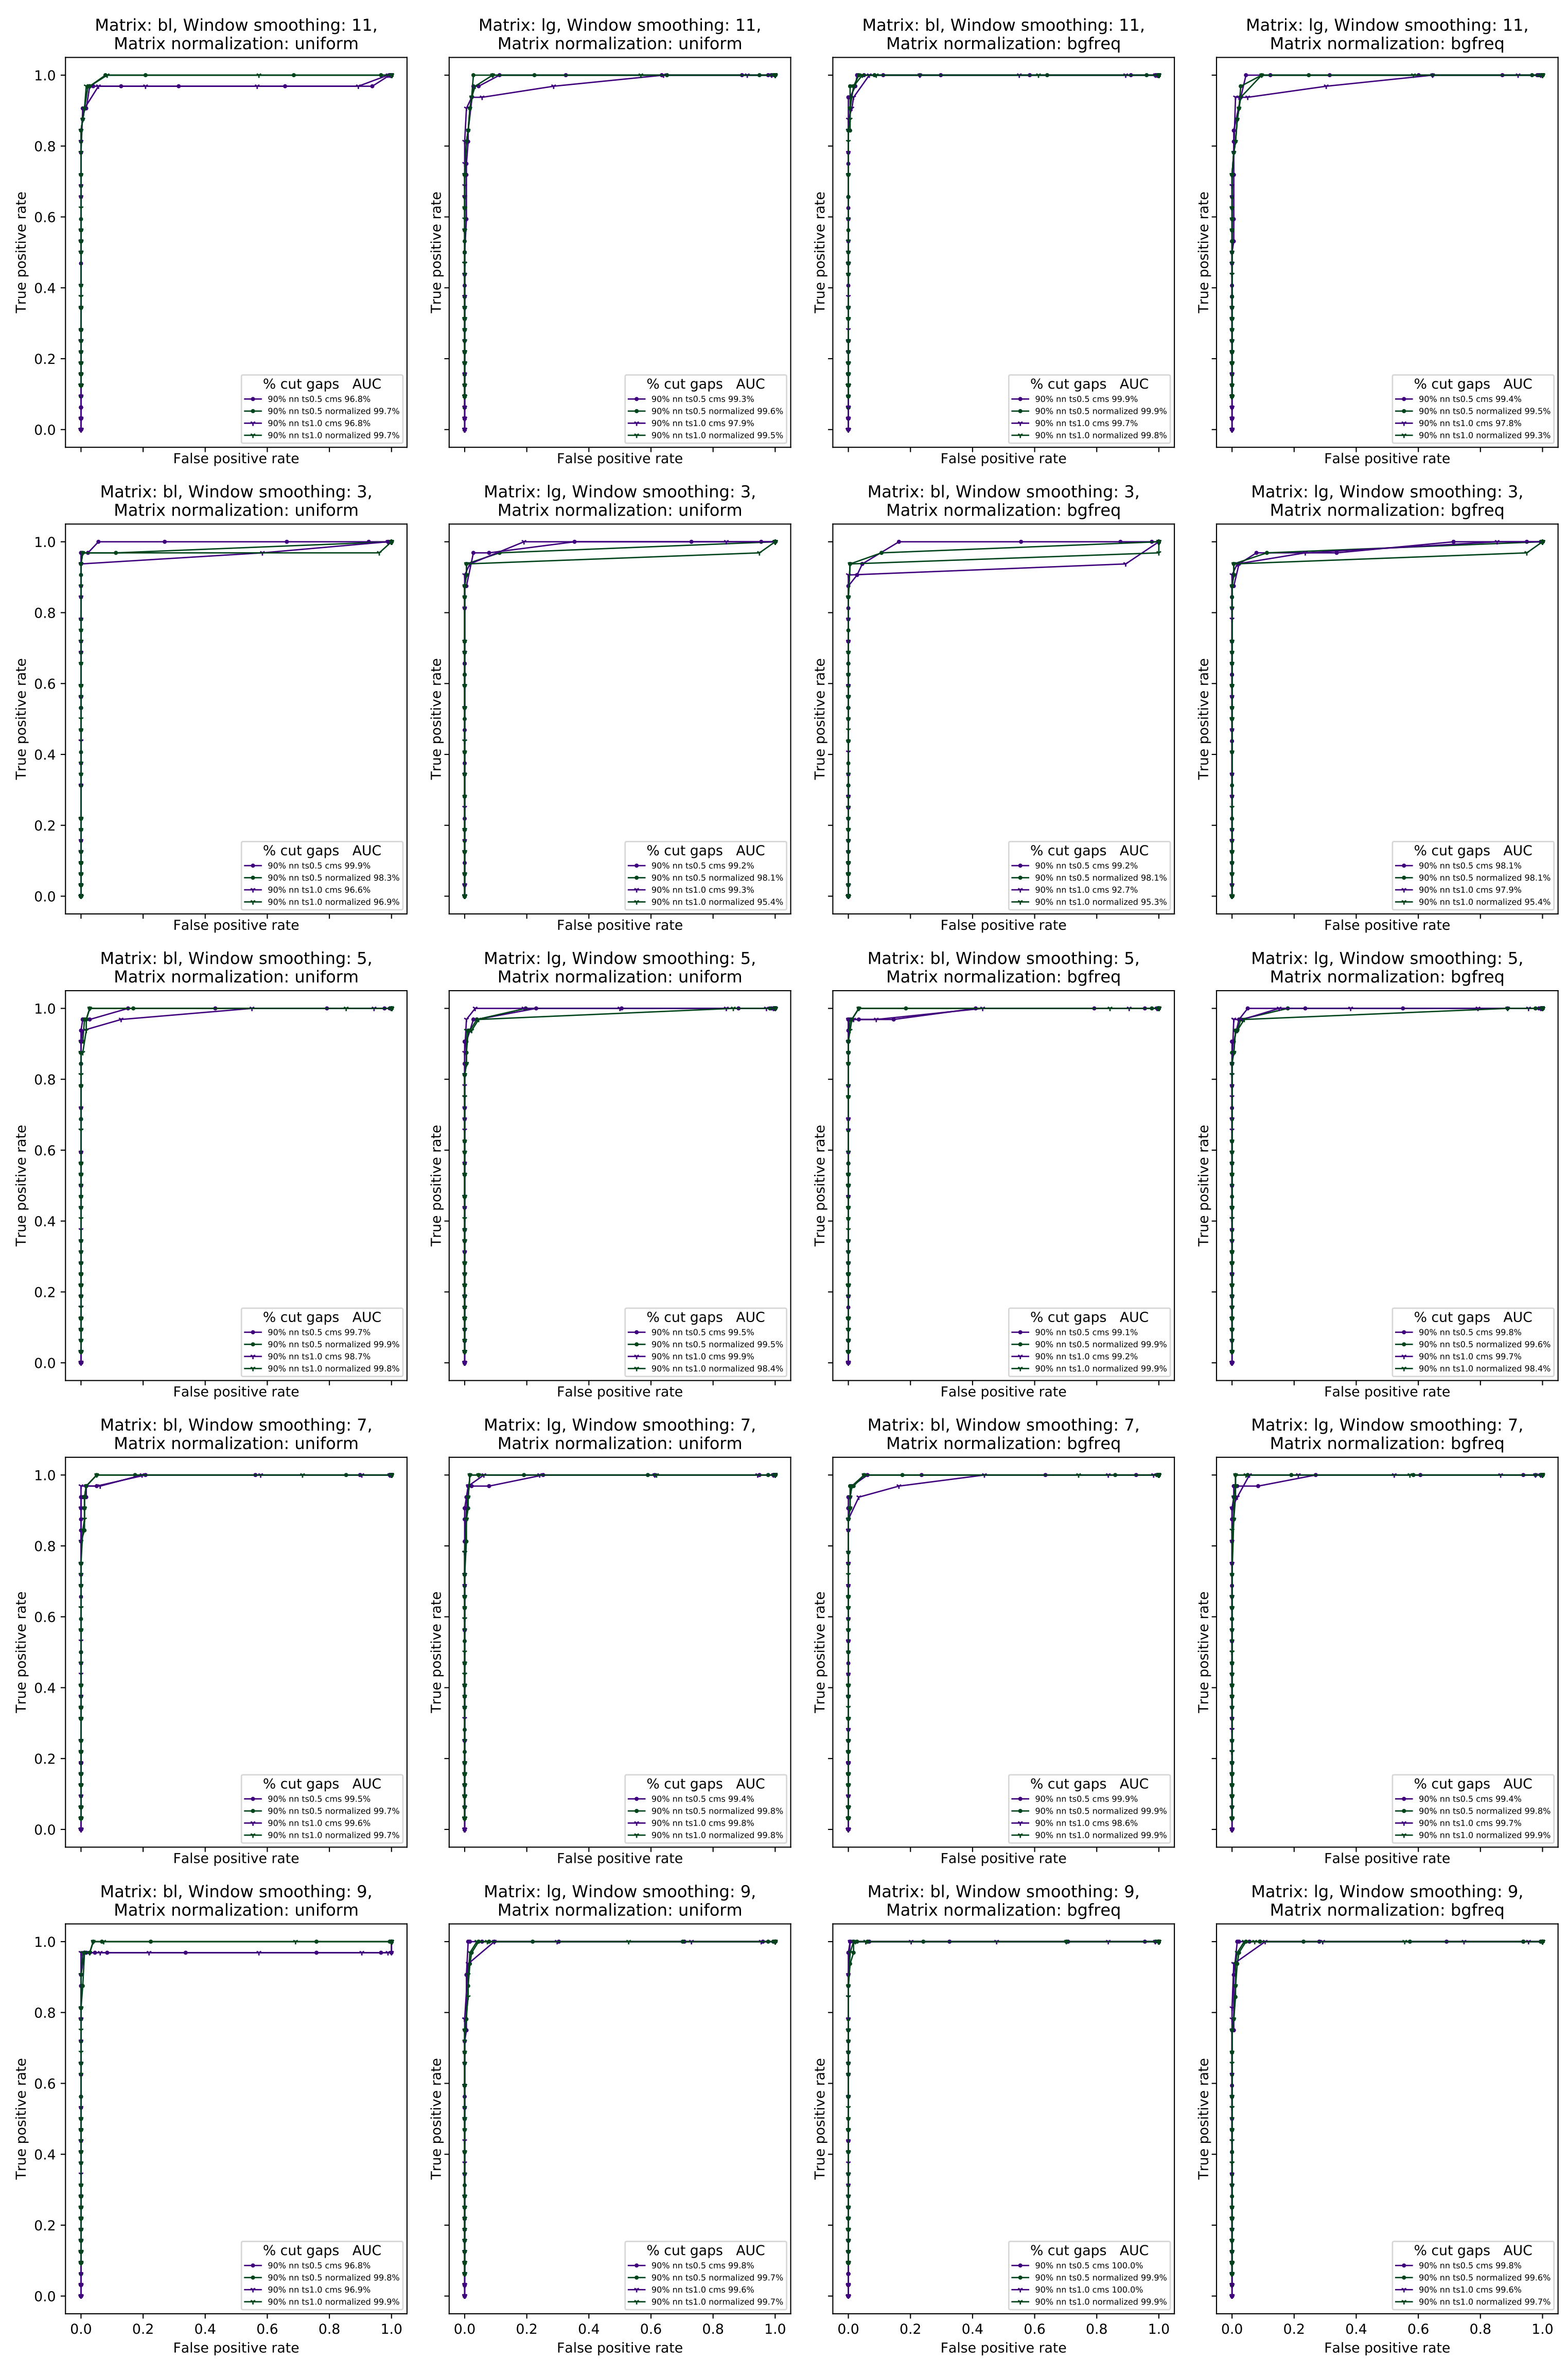



PRST vs rProt

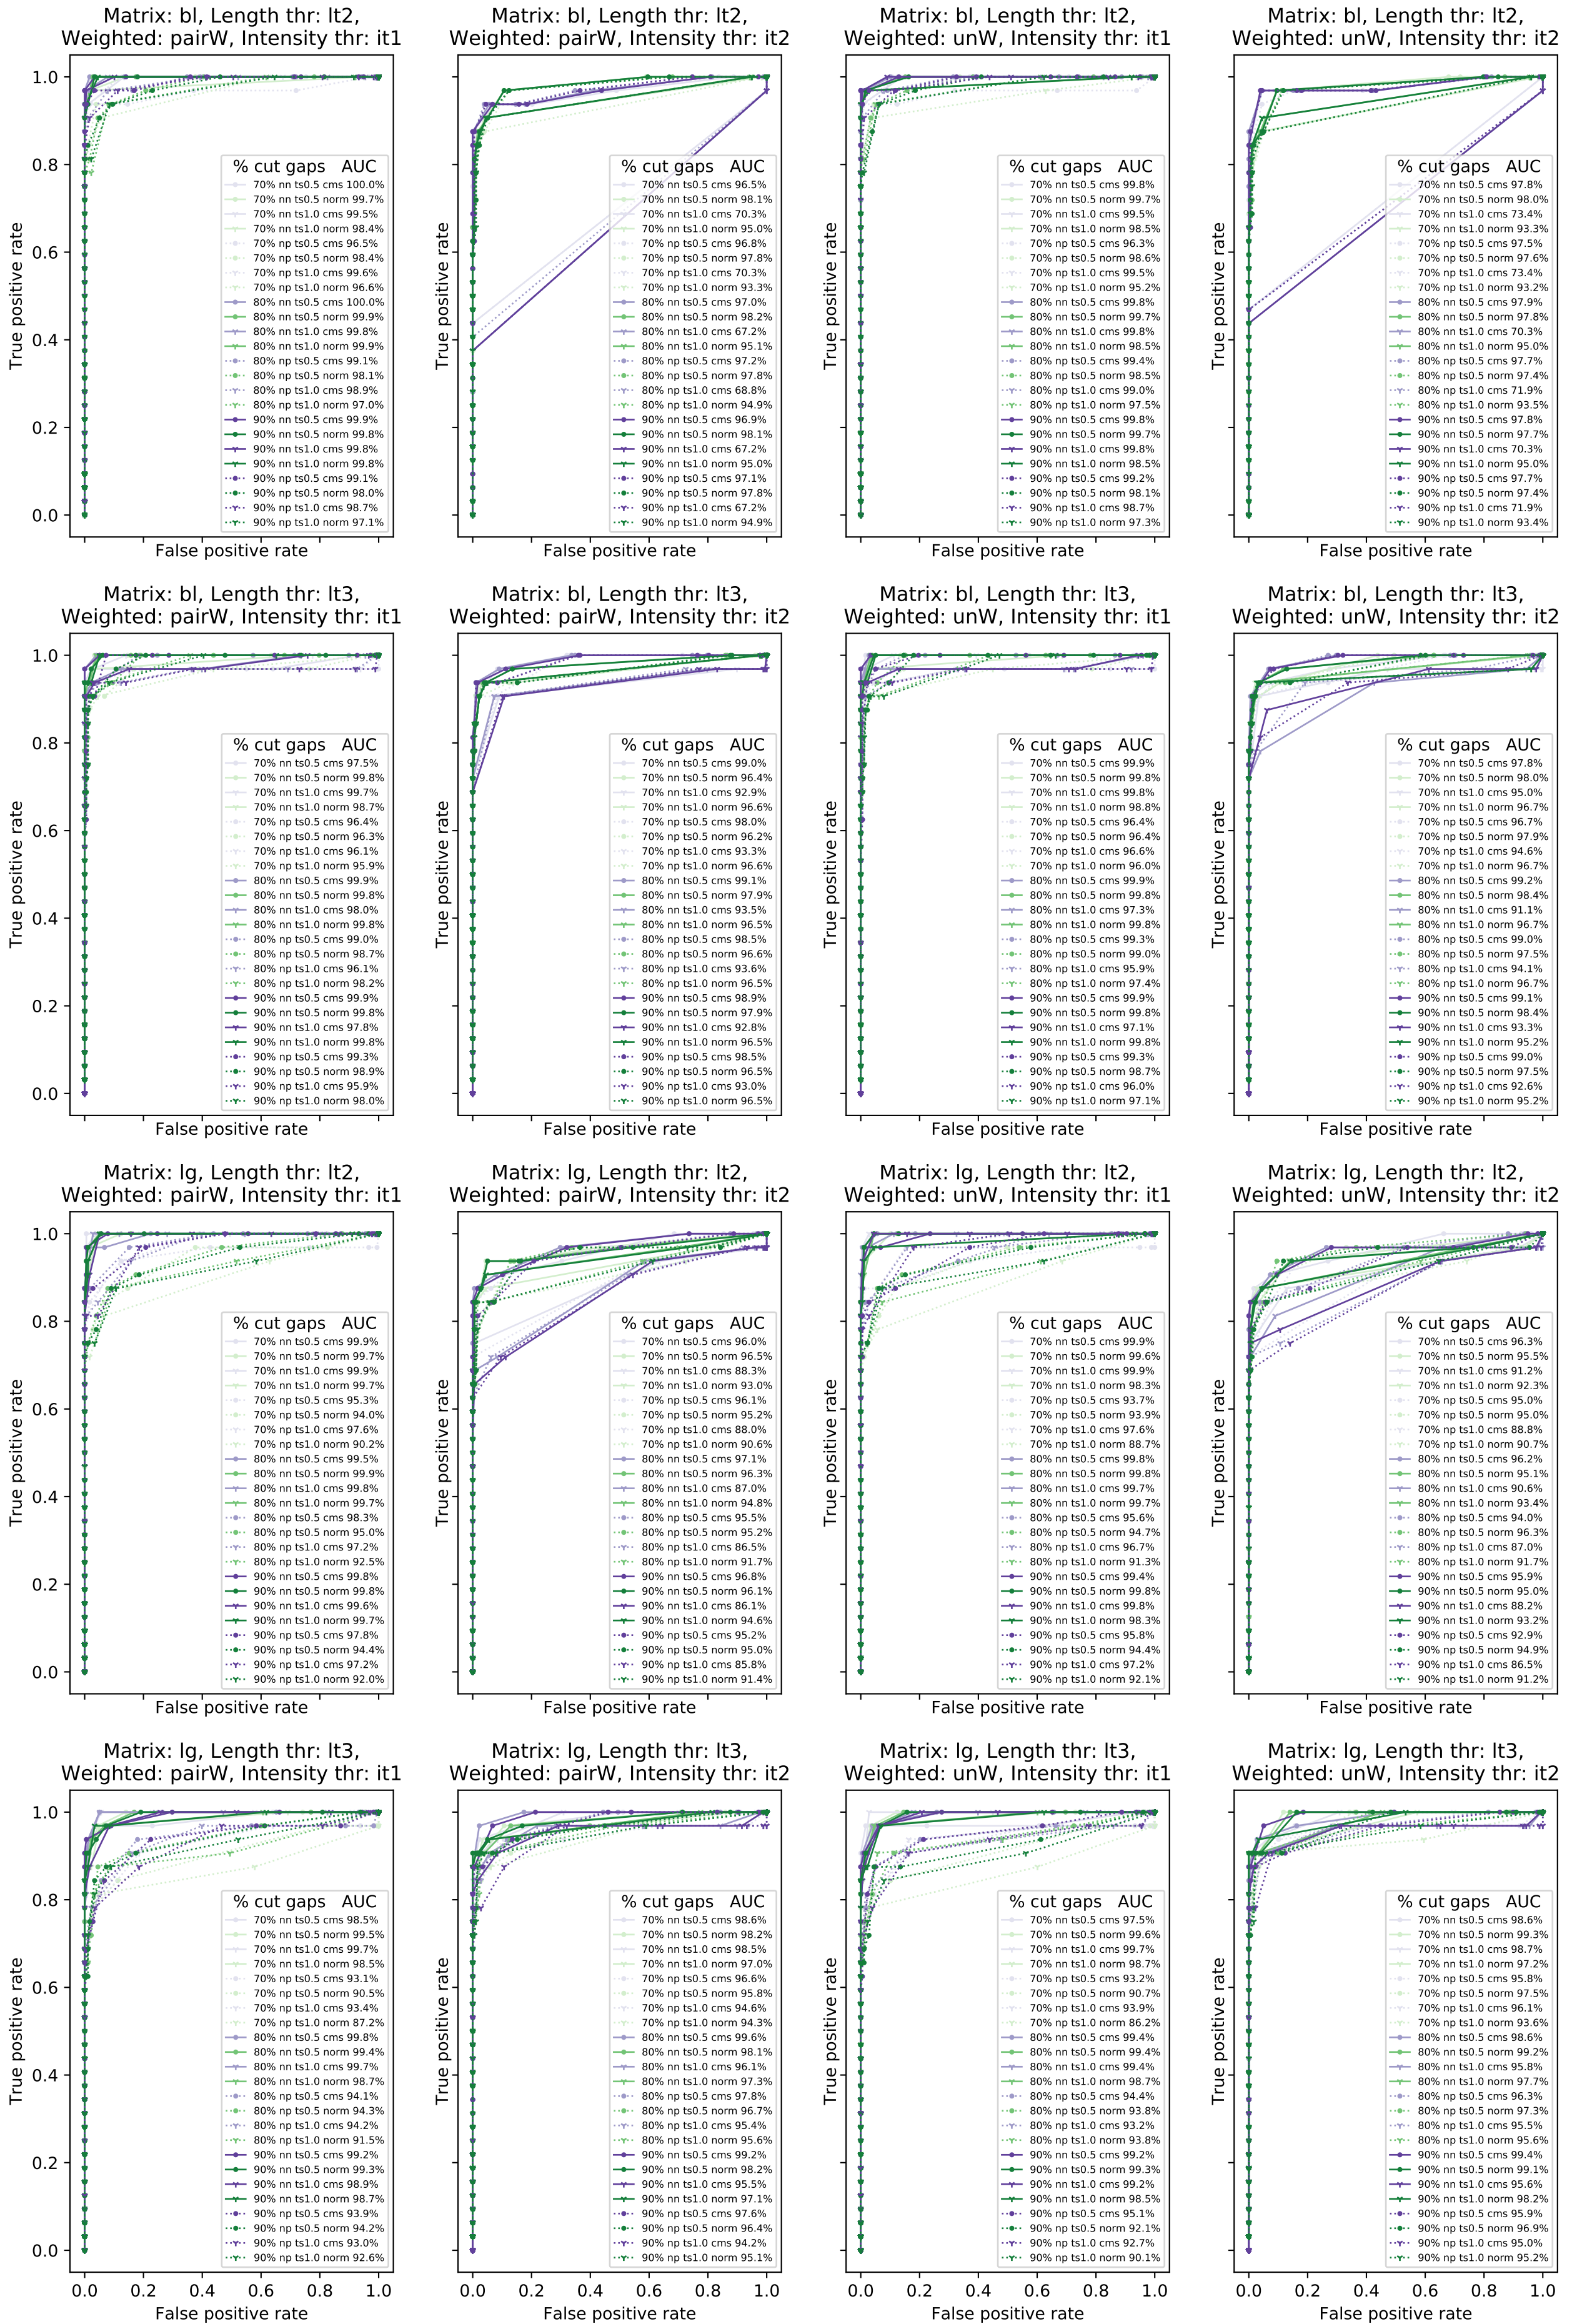



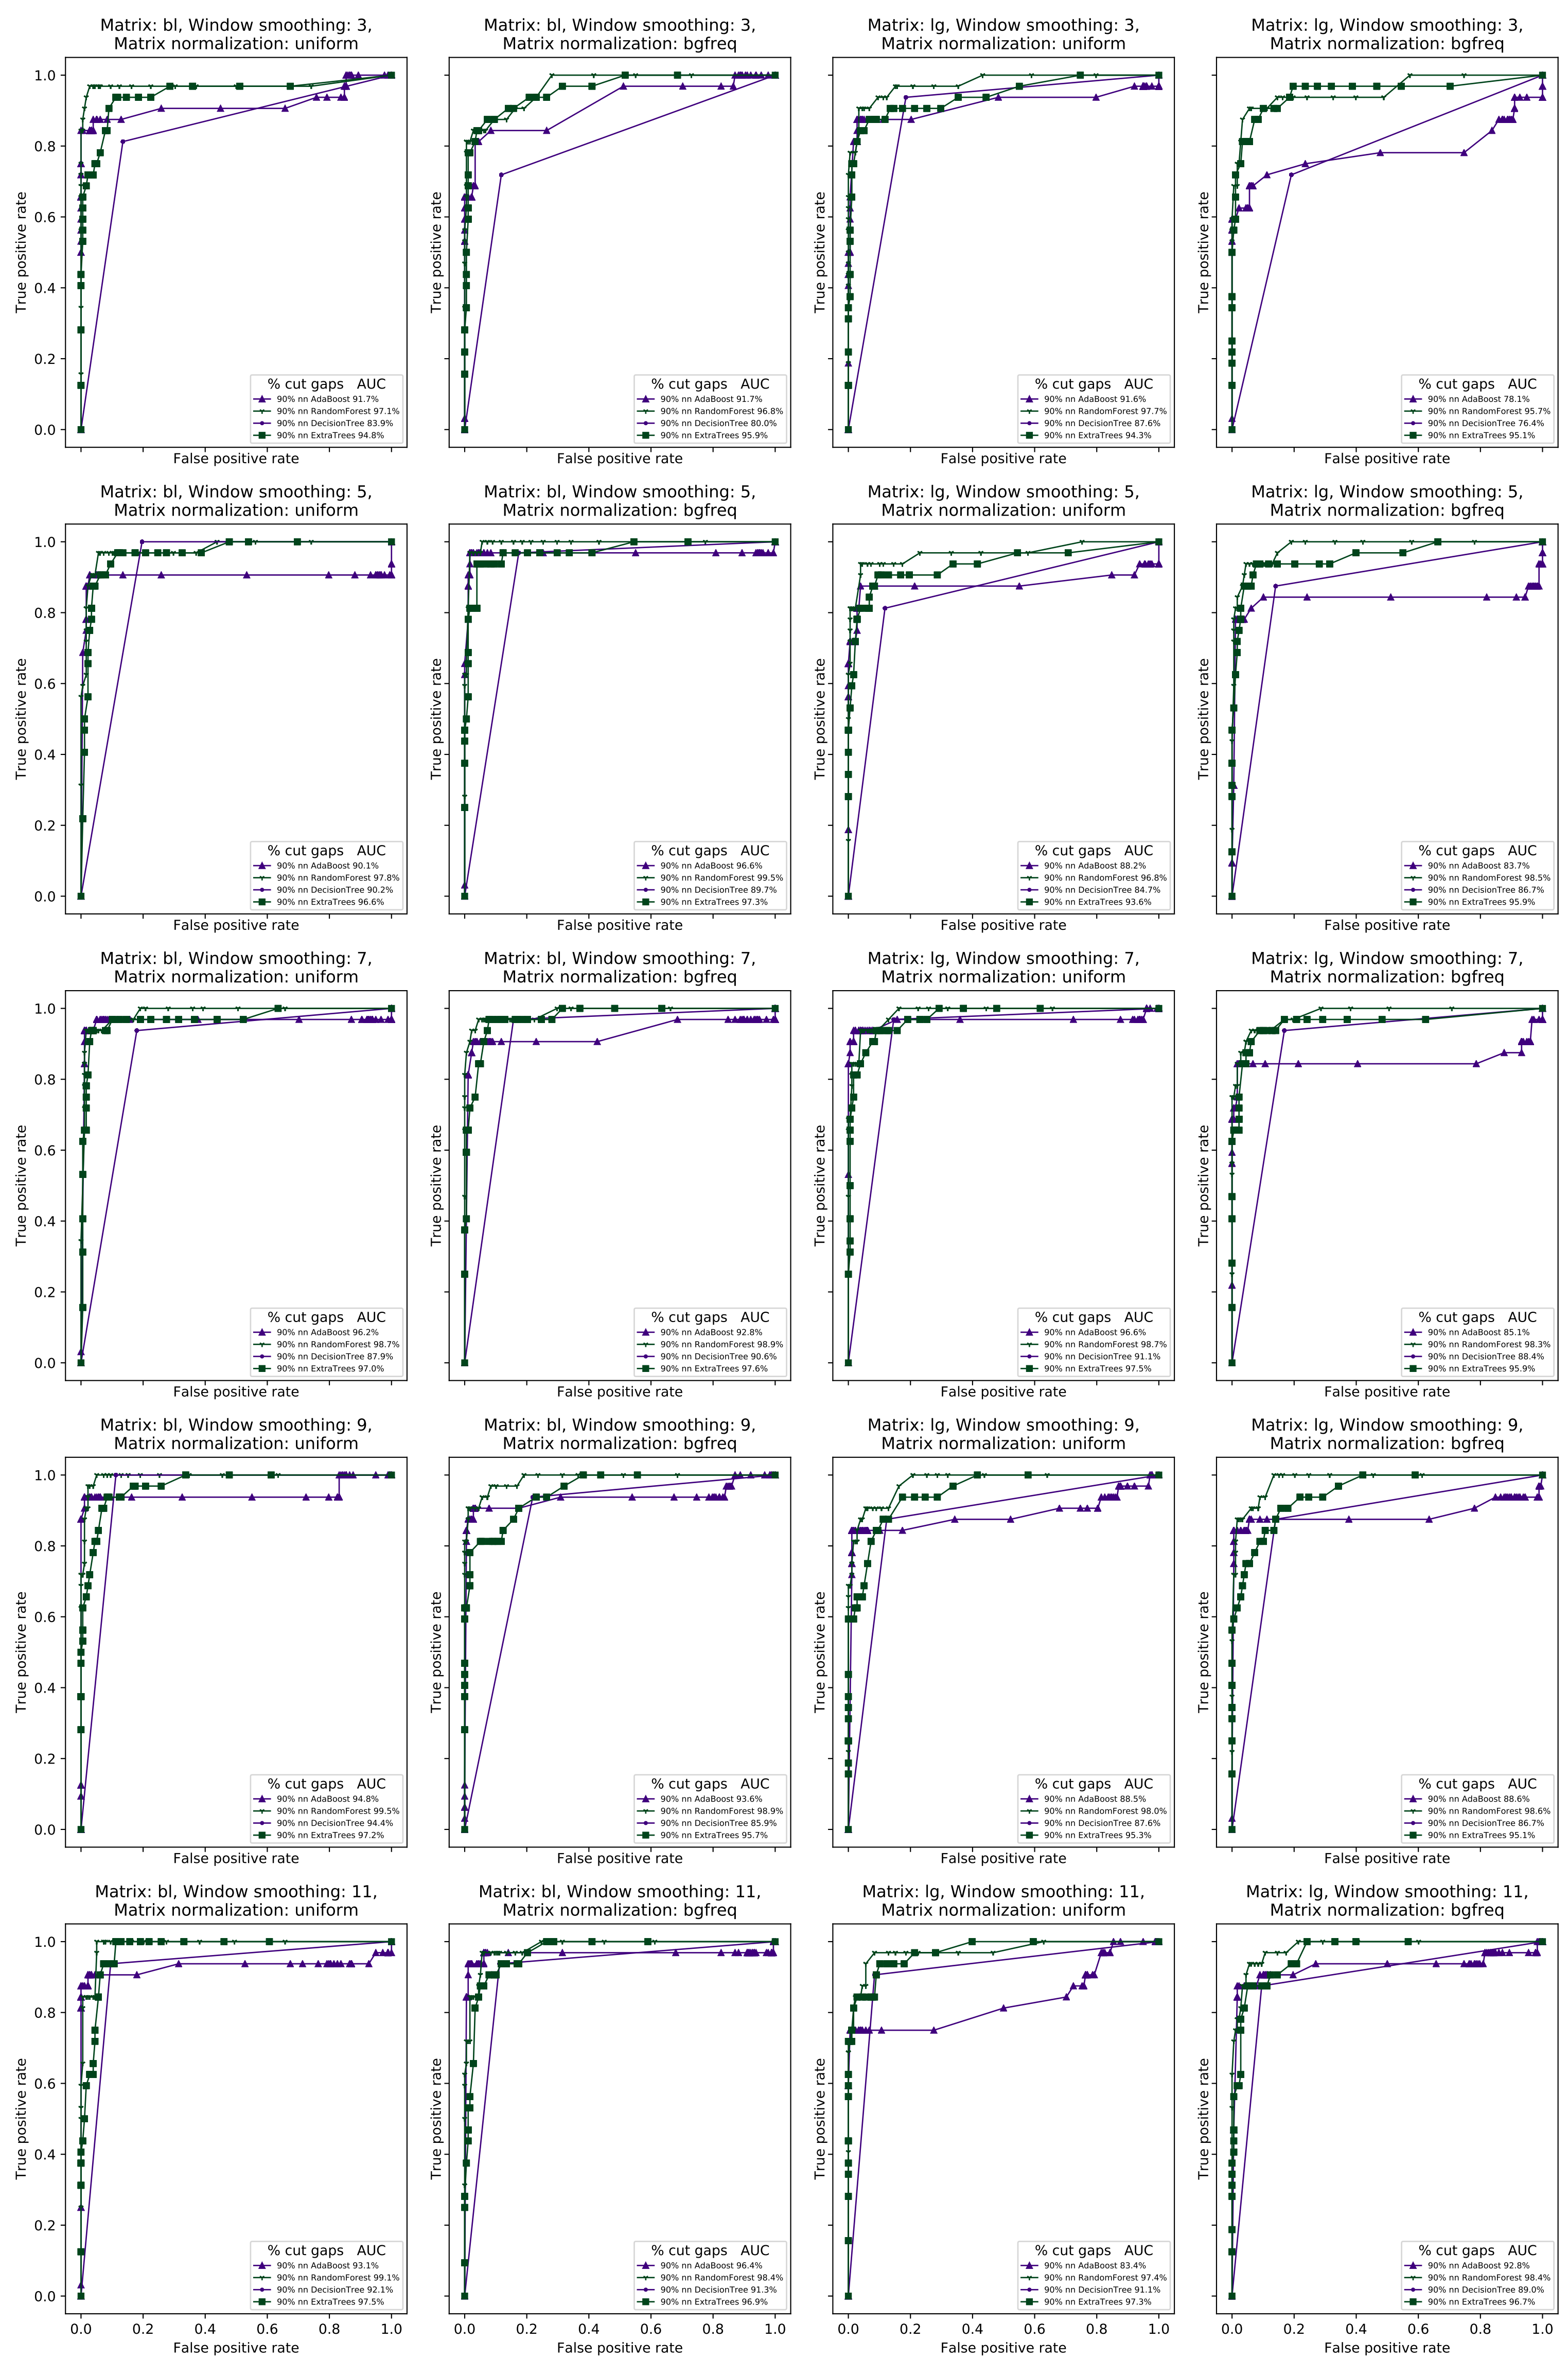

Supplement: pcbi.1009541.s003.pdf [file pcbi.1009541.s003.pdf]
