# Supplementary material for: TwinCons: Conservation score for uncovering deep sequence similarity and divergence
Source: PLoS Comput Biol. 2021 Oct 29;17(10):e1009541. doi: 10.1371/journal.pcbi.1009541 (PMC8580257; doi:10.1371/journal.pcbi.1009541)
Supplement: S1 Dataset — Alignments with similar EC annotations are colored the same. Combinations between alignments that share color are excluded from dataset generation. (XLSX) [file pcbi.1009541.s002.xlsx]

## Sheet: Sheet1
BBS30001.fas	ALDEHYDE DEHYDROGENASE	1.2.1.5	Gamma-glutamyl phosphate reductase	1.2.1.41
BBS30002_trunc.fas	PROLYL-TRNA SYNTHETASE	6.1.1.15	GLYCYL-TRNA SYNTHETASE	6.1.1.14
BBS30003_trunc_mafft.fas	ASPARTATE AMINOTRANSFERASE	2.6.1.1
BBS30004.fas	acyl-CoA oxidase	1.3.3.6	BUTYRYL-COA DEHYDROGENASE	1.3.8.1
BBS30005_trunc.fas	CYTOCHROME P450 ERYF	1.14.15.35	CYTOCHROME P450 2C5	1.14.14.1
BBS30006.fas	NUCLEAR FACTOR NF-KAPPA-B P50		PHOSPHATIDYLINOSITOL 3-KINASE
BBS30007.fas	Benzoate 1,2-Dioxygenase Reductase	1.18.1.3	FERREDOXIN
BBS30008_renamed.fas	eIF2gamma	3.6.5.3	ELONGATION FACTOR EEF1A
BBS30009_trunc.fas	TRP OPERON REPRESSOR		HISTONE H5
BBS30011_trunc_mafft.fas	MALATE DEHYDROGENASE	1.1.1.37	L-LACTATE DEHYDROGENASE	1.1.1.27
BBS30012_trunc_mafft.fas	DIHYDROLIPOAMIDE DEHYDROGENASE	1.8.1.4	THIOREDOXIN REDUCTASE	1.8.1.9
BBS30013_trunc.fas	AMYLASE	3.2.1.1	1,4-alpha-glucan Branching Enzyme	2.4.1.18
BBS30014_A_trunc.fas	GLUTATHIONE S-TRANSFERASE III	2.5.1.18	GLUTATHIONE S-TRANSFERASE ALPHA	2.5.1.18
BBS30014_B_trunc.fas	GLUTATHIONE S-TRANSFERASE III	2.5.1.18	GLUTATHIONE S-TRANSFERASE	2.5.1.18
BBS30015_trunc_mafft.fas	AZURIN ISO-2		NITROUS OXIDE REDUCTASE	1.7.2.4
BBS30016_trunc_mafft.fas	Pituitary-specific positive transcription factor 1		NITRITE RESPONSE REGULATOR
BBS30019.fas	5'-EXONUCLEASE	3.1.1.1	FLAP ENDONUCLEASE-1	3.1
BBS30020_A_trunc_mafft.fas	SUMO-1		FERREDOXIN
BBS30020_B_trunc_mafft.fas	UBIQUITIN		FERREDOXIN
BBS30021_A_trunc.fas	THYMIDYLATE KINASE	2.7.4.9	URIDYLATE KINASE	2.7.4.14
BBS30021_B_trunc.fas	THYMIDYLATE KINASE	2.7.4.9	GUANYLATE KINASE	2.7.4.8
BBS30021_C_trunc.fas	URIDYLATE KINASE	2.7.4.14	GUANYLATE KINASE	2.7.4.8
BBS30022_trunc_manual.fas	FERRICYTOCHROME C-552		CYTOCHROME C
BBS30023_A_trunc.fas	D-glucose 4,6-dehydratase	4.2.1.46	HYDROXYSTEROID DEHYDROGENASE	1.1.1.53
BBS30023_B_trunc.fas	D-glucose 4,6-dehydratase	4.2.1.46	MANNITOL DEHYDROGENASE	1.1.1.138
BBS30023_C_trunc.fas	D-glucose 4,6-dehydratase	4.2.1.46	TRIHYDROXYNAPHTHALENE REDUCTASE	1.1.1.252
BBS30024_A_trunc.fas	DIHYDROOROTATE DEHYDROGENASE B	1.3.1.1.4	CYTOCHROME B5 REDUCTASE	1.6.2.2
BBS30024_B_trunc.fas	FLAVOHEMOPROTEIN	1.14.12.17	CYTOCHROME B5 REDUCTASE	1.6.2.2
BBS30024_C_trunc.fas	DIHYDROOROTATE DEHYDROGENASE B	1.3.1.1.4	FLAVOHEMOPROTEIN	1.14.12.17
BBS30025_A_trunc.fas	THIOLTRANSFERASE		THIOL:DISULFIDE INTERCHANGE
BBS30025_B_trunc.fas	THIOLTRANSFERASE		DISULFIDE ISOMERASE	5.3.4.1
BBS30025_C_trunc.fas	THIOL:DISULFIDE INTERCHANGE		DISULFIDE ISOMERASE	5.3.4.1
BBS30026_A_trunc.fas	FERREDOXIN REDUCTASE		THIOREDOXIN REDUCTASE	1.8.1.9
BBS30026_B_trunc.fas	FERREDOXIN REDUCTASE		GLUTATHIONE REDUCTASE	1.8.1.7
BBS30026_C_trunc.fas	THIOREDOXIN REDUCTASE	1.8.1.9	GLUTATHIONE REDUCTASE	1.8.1.7
BBS30027_trunc.fas	CYTOCHROME C553		CYTOCHROME C
BBS30029.fas	GLUTAMINYL-TRNA SYNTHETASE	6.1.1.18	GLUTAMYL-TRNA SYNTHETASE	6.1.1.17
BBS30030_trunc.fas	CASEIN KINASE-1	2.7.11.1	HAEMATOPOETIC CELL KINASE	2.7.10.2
