# Supplementary material for: TwinCons: Conservation score for uncovering deep sequence similarity and divergence
Source: PLoS Comput Biol. 2021 Oct 29;17(10):e1009541. doi: 10.1371/journal.pcbi.1009541 (PMC8580257; doi:10.1371/journal.pcbi.1009541)
Supplement: S7 Dataset — TwinCons results from protein composite alignments of caspase-metacaspase and uL2. Thresholds for signature and conserved positions for each alignment are indicated. (XLSX) [file pcbi.1009541.s008.xlsx]

## Sheet: 23S
Alignment index	Score		TwinCons > 5.5	TwinCons < -0.75
1	0		900	290
2	0
3	0.0342674
4	-0.00822419
5	-0.160372
6	-0.101432
7	0.428343
8	-0.0657935
9	-0.298812
10	1.10821
11	-0.504417
12	-0.443421
13	0.0986902
14	0.208346
15	-1.11022e-16
16	0.00479744
17	-0.119936
18	-1.49954
19	5.45949
20	-1.83879
21	2.02383
22	-1.51531
23	3.66867
24	1.08354
25	0.584602
26	-1.38646
27	1.49749
28	5.07501
29	6.17979
30	4.26355
31	6.75
32	5.34366
33	6.75
34	6.75
35	4.68847
36	-1.52627
37	0
38	6.19898
39	6.17979
40	-0.868337
41	6.75
42	6.61567
43	4.58156
44	-1.71269
45	0.760052
46	-1.51531
47	-0.283734
48	0.0973195
49	3.38288
50	0
51	0
52	0
53	0.853259
54	5.0942
55	0.406412
56	3.8777
57	5.92553
58	6.64925
59	0.853259
60	6.75
61	6.75
62	6.38265
63	6.21269
64	6.56633
65	0.89438
66	6.43474
67	6.75
68	4.70766
69	5.27239
70	1.14659
71	-1.11022e-16
72	0.406412
73	4.60075
74	2.85448
75	0.738806
76	6.34701
77	3.98942
78	5.13806
79	6.75
80	6.43474
81	6.48134
82	2.28975
83	6.75
84	3.06557
85	6.17431
86	5.91936
87	1.14933
88	-0.0651081
89	0.359808
90	5.46429
91	6.21269
92	3.47129
93	1.83468
94	6.61567
95	5.87275
96	-0.02947
97	0.820362
98	6.48134
99	0.16791
100	1.10821
101	-0.879302
102	0.519494
103	0.543482
104	3.66045
105	0.480429
106	-0.18573
107	4.01135
108	0.40367
109	3.0032
110	-1.11022e-16
111	-1.94289e-16
112	1.51188
113	5.8097
114	6.75
115	0.962915
116	6.21269
117	5.36285
118	0.417377
119	1.92514
120	1.14933
121	6.21269
122	5.13806
123	6.75
124	-0.10897
125	0.891639
126	6.56633
127	5.8892
128	4.98728
129	6.75
130	6.64925
131	6.64925
132	5.38273
133	5.2018
134	6.33673
135	-1.2679
136	0.552391
137	-0.588029
138	-2.22045e-16
139	-0.330338
140	0
141	0
142	0
143	0
144	0
145	0
146	0
147	0
148	5.83506
149	3.64743
150	-0.0986902
151	-0.0013707
152	-1.11022e-16
153	0.644913
154	0.44205
155	0.0013707
156	-1.11022e-16
157	5.55112e-17
158	-1.11022e-16
159	1.3474
160	-0.113083
161	0.00753884
162	0.227536
163	0
164	-0.0246726
165	5.55112e-17
166	-0.106914
167	0.0178191
168	0.00822419
169	-0.00822419
170	0.0013707
171	-0.00411209
172	-0.00411209
173	-2.77556e-17
174	-5.55112e-17
175	0.00753884
176	-5.55112e-17
177	0.270027
178	0.534572
179	0.811453
180	0
181	0.439994
182	-0.00205605
183	0
184	0
185	0
186	-0.000685349
187	-0.00342674
188	-0.00411209
189	-0.013707
190	-0.0027414
191	0.0219312
192	-0.00205605
193	-0.0246726
194	0.0198751
195	-0.0616814
196	-1.11022e-16
197	5.55112e-17
198	5.55112e-17
199	0.013707
200	1.11022e-16
201	1.11022e-16
202	-5.55112e-17
203	5.55112e-17
204	0.257691
205	0
206	1.11022e-16
207	0
208	-5.55112e-17
209	0.13707
210	-1.11022e-16
211	-1.11022e-16
212	-1.17961e-16
213	-0.100061
214	1.81549
215	0.893009
216	0
217	0
218	0.692202
219	0.00479744
220	1.43101
221	5.55112e-17
222	0.228221
223	0.782668
224	0.960859
225	0.312519
226	5.55112e-17
227	-0.0890953
228	-0.173393
229	-0.0328967
230	0.00205605
231	0
232	0
233	-0.000685349
234	-0.0685349
235	-0.200122
236	0.0952635
237	-0.0349528
238	0.00411209
239	0
240	0
241	0
242	0
243	0
244	0
245	0
246	0
247	0
248	0
249	-0.916997
250	2.68588
251	1.17811
252	-0.699741
253	-0.072647
254	0
255	0
256	0
257	0
258	0
259	0
260	0
261	0
262	0
263	0
264	0
265	0
266	-0.0102802
267	-0.00548279
268	0.00822419
269	0.0411209
270	-0.0397502
271	0.164484
272	0.0370088
273	-0.000685349
274	0.145294
275	0
276	0
277	0
278	0
279	0
280	0
281	0
282	0
283	0
284	0
285	0
286	0
287	0
288	0
289	0
290	0
291	0
292	0
293	0
294	0
295	-0.0397502
296	0.0959488
297	-1.11022e-16
298	1.235
299	0
300	0.568154
301	0.439309
302	1.38778e-17
303	-0.372144
304	5.44304
305	0.0699056
306	3.29104
307	5.26416
308	6.75
309	6.61567
310	1.74147
311	2.04028
312	-0.0760737
313	0.908087
314	0.450274
315	6.56633
316	6.19898
317	6.75
318	0.230963
319	3.62755
320	6.38265
321	6.75
322	6.75
323	4.16486
324	6.48134
325	6.75
326	6.75
327	6.38265
328	6.01531
329	-0.369403
330	6.56633
331	6.43474
332	6.75
333	6.75
334	0.861483
335	0.902604
336	-0.341989
337	2.09237
338	1.23157
339	5.74459
340	6.75
341	6.75
342	6.75
343	4.58704
344	2.53099
345	5.27239
346	6.00434
347	6.75
348	5.30597
349	6.28739
350	0.539369
351	4.561
352	5.44373
353	6.01394
354	0.00822419
355	0
356	0.378313
357	0.860113
358	4.561
359	0.519494
360	6.48134
361	6.75
362	5.25594
363	0.115824
364	3.7701
365	5.8097
366	2.02383
367	2.11704
368	0.159686
369	6.75
370	6.75
371	6.75
372	6.75
373	2.70918
374	5.55112e-17
375	-0.509214
376	5.5102
377	6.30315
378	6.43748
379	6.75
380	6.75
381	0.834069
382	3.81122
383	6.38265
384	6.56633
385	6.75
386	1.97175
387	1.57699
388	1.72845
389	6.64925
390	3.70774
391	0.110341
392	5.55112e-17
393	1.04516
394	0
395	0.565413
396	6.75
397	5.55112e-17
398	6.56633
399	1.31655
400	2.43779
401	3.72624
402	5.00373
403	3.52612
404	3.52612
405	3.42537
406	2.12047
407	0.703168
408	0.873134
409	-0.23576
410	0.113083
411	0.0788151
412	-0.193954
413	-0.00685349
414	-0.365976
415	0
416	-0.0918367
417	0.0383795
418	-0.322114
419	-0.0945781
420	0.656564
421	0.090466
422	2.77556e-17
423	0
424	-1.38778e-16
425	5.55112e-17
426	0
427	-2.77556e-17
428	0.027414
429	0.252208
430	-0.180932
431	0
432	0
433	0
434	0.0849832
435	0.0575693
436	0.0109656
437	0.0219312
438	-0.19738
439	0.646969
440	0.0760737
441	-0.566783
442	0.0472891
443	-0.18573
444	-0.503731
445	0.302239
446	0.0335821
447	1.19045
448	3.21086
449	3.52612
450	-0.05894
451	3.33217
452	-1.11022e-16
453	5.55112e-17
454	3.21086
455	1.50297
456	1.05407
457	0
458	0
459	0
460	0
461	0
462	0
463	0
464	0
465	0
466	0
467	-0.000685349
468	-0.0123363
469	0.561986
470	-0.0548279
471	-1.01706
472	0
473	-0.764849
474	-0.23576
475	-0.148035
476	0
477	0
478	0
479	0
480	0
481	0
482	0.139811
483	-2.77556e-17
484	-5.55112e-17
485	2.77556e-17
486	-2.77556e-17
487	-1.66533e-16
488	8.32667e-17
489	-0.0651081
490	0.0390649
491	-0.00205605
492	0.0123363
493	0.00822419
494	0.0027414
495	0.00548279
496	0.0027414
497	-0.027414
498	0.0493451
499	0.0219312
500	-0.013707
501	-0.0191898
502	-0.0219312
503	-0.00548279
504	-0.0109656
505	0.027414
506	-0.0027414
507	0.0493451
508	-0.00548279
509	0.090466
510	-2.77556e-17
511	-0.130216
512	-0.161057
513	0
514	0
515	-0.564042
516	-0.0808712
517	-0.261803
518	-1.38778e-16
519	8.32667e-17
520	0
521	-2.77556e-17
522	0
523	-2.77556e-17
524	1.38778e-16
525	-1.11022e-16
526	0.00822419
527	0.00753884
528	0.00685349
529	-0.0479744
530	-0.178876
531	2.77556e-17
532	0
533	0.00411209
534	0.130216
535	0.4023
536	0.00205605
537	0.229592
538	0.492766
539	-1.07805
540	5.55112e-17
541	0
542	2.22533
543	0.613387
544	-0.0856686
545	5.46292
546	0
547	-0.0013707
548	0
549	0
550	0
551	0
552	6.75
553	6.01531
554	0.296071
555	-0.278937
556	0.252894
557	-0.0623667
558	0.0719616
559	2.9285
560	6.48134
561	5.84328
562	5.55112e-17
563	5.6178
564	4.89133
565	6.61567
566	0
567	0.109656
568	4.11483
569	0
570	0.28579
571	0.0938928
572	0.258376
573	0.060996
574	2.69274
575	4.49931
576	4.24711
577	2.41585
578	1.84016
579	6.75
580	4.60075
581	4.33209
582	4.11004
583	5.0147
584	6.61567
585	6.75
586	5.64522
587	6.61567
588	0.55993
589	6.61567
590	4.49931
591	2.64613
592	6.61567
593	5.0147
594	3.73172
595	5.54379
596	6.75
597	6.56633
598	0.0418063
599	0.557189
600	1.90527
601	0
602	-2.22045e-16
603	0
604	-0.893695
605	0
606	0
607	0
608	0.20629
609	-0.4818
610	-0.446162
611	0.0280993
612	0
613	0
614	0
615	-0.509214
616	0
617	0
618	-0.221368
619	-0.199436
620	0.104858
621	0.434511
622	-0.39339
623	0
624	0
625	0
626	0
627	0
628	0
629	0
630	-1.66533e-16
631	-1.66533e-16
632	0
633	-2.77556e-17
634	0
635	0
636	0
637	5.55112e-17
638	-2.77556e-17
639	1.66533e-16
640	5.55112e-17
641	1.11022e-16
642	0
643	0
644	0
645	0.454386
646	0.314575
647	0
648	-0.430399
649	-0.556503
650	0
651	0
652	0
653	0
654	0
655	0
656	3.1807
657	1.94708
658	0.280308
659	4.60075
660	6.75
661	6.38265
662	6.75
663	6.56633
664	0.927277
665	0.22548
666	1.9087
667	0.897122
668	4.19502
669	2.7037
670	2.5447
671	-1.88265
672	0.228221
673	-1.94845
674	-1.11022e-16
675	0
676	0
677	6.01531
678	1.46528
679	1.24596
680	1.69213
681	4.1868
682	2.50906
683	1.37961
684	0.392705
685	4.7104
686	0.853259
687	0.258376
688	0.803914
689	6.19898
690	6.75
691	6.75
692	1.08559
693	0.742918
694	2.53648
695	4.36224
696	3.7235
697	3.45484
698	1.3193
699	5.26965
700	2.07318
701	0
702	6.00434
703	2.57143
704	3.85714
705	-1.11022e-16
706	0.00205605
707	2.13006
708	-1.86346
709	5.26965
710	1.25076
711	1.22609
712	3.60288
713	2.3857
714	6.56633
715	6.75
716	2.61598
717	1.26721
718	6.56633
719	6.75
720	6.61567
721	6.56633
722	5.25594
723	5.28061
724	6.75
725	0
726	0
727	5.09968
728	1.06983
729	-0.437938
730	0
731	3.42332
732	0
733	-0.328967
734	-1.40908
735	0.789522
736	0
737	-1.71269
738	4.99002
739	4.65557
740	6.61567
741	6.75
742	6.61567
743	6.75
744	6.75
745	6.75
746	6.75
747	1.2069
748	6.19898
749	2.46588
750	6.75
751	3.09435
752	-1.11022e-16
753	-0.818306
754	0
755	6.38265
756	6.75
757	6.75
758	6.75
759	2.87093
760	4.2663
761	6.75
762	5.4917
763	6.48134
764	6.75
765	4.2663
766	2.63791
767	6.43474
768	6.75
769	6.75
770	4.05247
771	6.01531
772	-1.52901
773	4.19776
774	6.61567
775	6.38265
776	6.61567
777	6.75
778	6.75
779	6.75
780	0.406412
781	6.56633
782	5.09694
783	6.13593
784	5.59313
785	4.81732
786	3.19715
787	2.31922
788	-0.276196
789	0.173393
790	5.35189
791	4.07714
792	5.75487
793	6.13593
794	3.2602
795	-0.948523
796	0
797	6.38265
798	6.28739
799	5.83163
800	0.0973195
801	5.87755
802	6.61567
803	-1.20827
804	6.61567
805	6.75
806	1.98134
807	-1.72365
808	6.08178
809	4.65557
810	6.75
811	6.56633
812	6.75
813	6.75
814	6.30589
815	4.67476
816	5.07501
817	1.25624
818	-0.818992
819	0.661362
820	1.1603
821	3.66867
822	-1.69898
823	0.507158
824	0.962915
825	6.25381
826	0.357067
827	3.44388
828	-1.51531
829	0.00205605
830	-0.199436
831	0.000685349
832	-0.848462
833	0
834	5.0661
835	-0.874505
836	0.184359
837	1.93611
838	-0.22685
839	-1.46322
840	0
841	0
842	6.56633
843	5.48622
844	0.779242
845	1.57219
846	-0.0397502
847	-0.418063
848	0
849	0
850	-0.140496
851	0.110341
852	0
853	0
854	0
855	0
856	0
857	0
858	0
859	0.0548279
860	0.0123363
861	0
862	-0.0109656
863	-0.0822419
864	0.00548279
865	-0.0027414
866	-0.0109656
867	0.0219312
868	-0.0178191
869	-0.045233
870	0
871	-0.0616814
872	0
873	0
874	0
875	0
876	0
877	0
878	0
879	0
880	0
881	0
882	0
883	0.0356381
884	0.175449
885	-0.0308407
886	0
887	0
888	0
889	0
890	0
891	0
892	0
893	0
894	0
895	0
896	0
897	0
898	0
899	0
900	0
901	0
902	0
903	0
904	0
905	0.0644228
906	0
907	0
908	0
909	0
910	0
911	0
912	0
913	0
914	0
915	0.0123363
916	-0.109656
917	0
918	0
919	0.295385
920	0
921	0.544852
922	2.13212
923	-1.11022e-16
924	0
925	0
926	0
927	0
928	0
929	0
930	0
931	0
932	0
933	0
934	0
935	0
936	0.0829272
937	-0.0280993
938	-0.0383795
939	-0.0548279
940	0.0520865
941	-0.0342674
942	-0.0397502
943	0.0178191
944	-0.0013707
945	-0.00822419
946	-0.0164484
947	-0.0301553
948	0.00548279
949	-0.0027414
950	-0.0198751
951	0
952	-0.0411209
953	0.314575
954	0.259062
955	3.45827
956	1.21786
957	5.48622
958	6.56633
959	-2.16776
960	-0.665474
961	2.03206
962	0.181617
963	-1.24939
964	5.02566
965	2.45423
966	6.75
967	-0.204919
968	5.90291
969	-2.24178
970	6.75
971	1.18771
972	6.19898
973	4.45819
974	6.75
975	-0.0541426
976	6.61567
977	-0.799802
978	1.80178
979	6.75
980	-1.76477
981	5.90291
982	2.01013
983	4.21695
984	1.94433
985	6.38265
986	1.492
987	5.11339
988	-2.12664
989	6.75
990	6.75
991	2.18284
992	6.01531
993	2.82432
994	-1.87169
995	-0.980734
996	-2.77556e-17
997	-0.557874
998	0
999	0.111027
1000	0.72784
1001	0.00616814
1002	-0.0705909
1003	1.69213
1004	2.71467
1005	1.37412
1006	6.56633
1007	6.43748
1008	1.86758
1009	5.74254
1010	0
1011	6.75
1012	1.27818
1013	0.828587
1014	6.75
1015	6.75
1016	6.75
1017	1.77437
1018	0.335821
1019	0
1020	-0.05894
1021	0
1022	0.0795005
1023	0.00411209
1024	-1.11022e-16
1025	-1.11022e-16
1026	-0.111027
1027	-0.0719616
1028	0.221368
1029	0.0130216
1030	1.60577
1031	0
1032	0
1033	-0.000685349
1034	0.00205605
1035	0.0438623
1036	-0.243984
1037	0
1038	-0.164484
1039	0.402985
1040	0.7765
1041	6.43474
1042	0.074703
1043	6.38265
1044	5.89194
1045	1.46733
1046	6.75
1047	4.23066
1048	0.784724
1049	6.75
1050	6.75
1051	0.891639
1052	6.75
1053	6.75
1054	6.75
1055	6.61567
1056	0.982105
1057	6.75
1058	0
1059	0
1060	0
1061	0
1062	0
1063	0
1064	0
1065	0
1066	0
1067	0
1068	0
1069	0
1070	0
1071	0
1072	0
1073	0
1074	0
1075	0
1076	0
1077	0
1078	0
1079	0
1080	0
1081	0
1082	0
1083	0
1084	0
1085	0
1086	0
1087	0
1088	0
1089	0
1090	0
1091	0
1092	0
1093	0
1094	0
1095	0
1096	0
1097	0
1098	0
1099	0
1100	0
1101	0
1102	0
1103	0
1104	0
1105	0
1106	0
1107	0
1108	0
1109	0
1110	0
1111	0
1112	0
1113	0
1114	0
1115	0
1116	0
1117	0
1118	0
1119	0
1120	0
1121	0
1122	0
1123	0
1124	0
1125	0
1126	0
1127	0
1128	0
1129	0
1130	0
1131	0
1132	0
1133	0
1134	0
1135	0
1136	0
1137	0
1138	0
1139	0
1140	0
1141	0
1142	0
1143	0
1144	0
1145	0
1146	0
1147	0
1148	0
1149	0
1150	0
1151	0
1152	0
1153	0
1154	0
1155	0
1156	0
1157	0
1158	0
1159	0
1160	0
1161	0
1162	0
1163	0
1164	0
1165	0
1166	0
1167	0
1168	0
1169	0
1170	0
1171	0
1172	0
1173	0
1174	0
1175	0
1176	0
1177	0
1178	0
1179	0
1180	0
1181	-2.22045e-16
1182	-0.964286
1183	1.79082
1184	-2.24178
1185	-1.98683
1186	-1.3097
1187	0
1188	1.42347
1189	2.70918
1190	4.598
1191	-0.0267286
1192	1.11849
1193	0
1194	5.15793
1195	1.99368
1196	6.56633
1197	6.19898
1198	0
1199	2.13829
1200	0.361864
1201	-1.11022e-16
1202	-1.11022e-16
1203	5.55112e-17
1204	0
1205	0
1206	0
1207	5.55112e-17
1208	-5.55112e-17
1209	0
1210	0
1211	0
1212	1.11022e-16
1213	0
1214	5.55112e-17
1215	0
1216	5.55112e-17
1217	5.55112e-17
1218	-5.55112e-17
1219	0
1220	-5.55112e-17
1221	-5.55112e-17
1222	5.55112e-17
1223	-0.543482
1224	0.0150777
1225	6.34701
1226	6.43748
1227	5.83163
1228	1.37687
1229	-0.248782
1230	1.70926
1231	0.113768
1232	0.516068
1233	2.09785
1234	0.636689
1235	-0.912199
1236	-0.46261
1237	-1.87169
1238	2.65161
1239	5.55112e-17
1240	5.28061
1241	5.83163
1242	6.38265
1243	4.31838
1244	3.36164
1245	6.61567
1246	6.75
1247	6.61567
1248	1.87032
1249	6.56633
1250	5.66441
1251	1.11022e-16
1252	1.20964
1253	2.72015
1254	3.23005
1255	0.288532
1256	6.75
1257	6.75
1258	5.67537
1259	6.75
1260	6.56633
1261	6.56633
1262	0.584602
1263	-0.177505
1264	6.34701
1265	-1.60851
1266	3.00251
1267	6.38265
1268	2.75305
1269	0.732638
1270	5.46429
1271	6.38265
1272	5.19015
1273	6.48134
1274	0.239187
1275	5.09694
1276	6.61567
1277	6.75
1278	6.75
1279	6.05094
1280	0.288532
1281	-0.607904
1282	0.499619
1283	1.28366
1284	3.18345
1285	0
1286	-0.951264
1287	-1.79082
1288	5.06062
1289	5.5102
1290	-0.906716
1291	-2.03069
1292	2.91479
1293	0.686034
1294	-0.240557
1295	-0.97251
1296	0.57912
1297	6.48134
1298	6.75
1299	6.61567
1300	6.75
1301	6.01531
1302	6.75
1303	0.258376
1304	6.30864
1305	5.11133
1306	6.16403
1307	1.37412
1308	0
1309	0
1310	6.01531
1311	-1.16441
1312	0.378998
1313	1.40154
1314	0.151462
1315	0.302239
1316	0.699741
1317	-0.400244
1318	0
1319	-0.60859
1320	-0.890953
1321	-1.77642
1322	-1.65032
1323	5.99817
1324	4.78373
1325	-1.04104
1326	6.01531
1327	6.25655
1328	2.12595
1329	-0.964971
1330	-0.490024
1331	0.0198751
1332	-0.424231
1333	0.570896
1334	1.42073
1335	0.494136
1336	-0.802543
1337	-0.413265
1338	6.75
1339	6.38265
1340	6.75
1341	0.669586
1342	2.02932
1343	4.17857
1344	2.23766
1345	-1.60851
1346	6.75
1347	-0.0980049
1348	0.0335821
1349	6.43474
1350	5.05034
1351	6.75
1352	4.65832
1353	3.88524
1354	6.61567
1355	3.79478
1356	3.18619
1357	6.75
1358	6.43748
1359	6.75
1360	3.06557
1361	2.43779
1362	5.53008
1363	2.85174
1364	5.28061
1365	6.56633
1366	4.60075
1367	6.75
1368	-0.341989
1369	6.56633
1370	0.288532
1371	3.23005
1372	2.02109
1373	1.16852
1374	5.79325
1375	6.56633
1376	0
1377	-0.585973
1378	2.57211
1379	4.40611
1380	3.62755
1381	5.09694
1382	6.30864
1383	6.75
1384	5.83163
1385	4.33483
1386	6.56633
1387	6.75
1388	6.03998
1389	6.56633
1390	-1.69898
1391	2.70918
1392	1.17674
1393	3.43839
1394	6.75
1395	6.19898
1396	6.75
1397	6.01531
1398	3.07653
1399	0
1400	-0.18573
1401	-0.224109
1402	0.968398
1403	-0.517438
1404	4.17857
1405	-1.94022
1406	-0.182988
1407	-0.119936
1408	-2.11567
1409	6.64925
1410	-0.500305
1411	0.62915
1412	-0.2947
1413	-0.114453
1414	2.64339
1415	5.64796
1416	3.18345
1417	3.89621
1418	1.492
1419	0.697
1420	-0.487283
1421	-5.55112e-17
1422	-1.09587
1423	-0.169281
1424	1.84839
1425	0.402985
1426	-0.33445
1427	-0.777871
1428	0.650396
1429	1.09176
1430	0.00685349
1431	-1.05475
1432	0.474947
1433	-0.0267286
1434	-0.196695
1435	-0.659991
1436	-1.84427
1437	5.42316
1438	2.40763
1439	4.89408
1440	6.75
1441	6.75
1442	6.75
1443	5.53556
1444	6.25381
1445	6.75
1446	5.35737
1447	0.0671642
1448	6.61567
1449	6.56633
1450	3.50693
1451	5.09146
1452	0.716189
1453	2.53922
1454	3.34519
1455	0
1456	1.9738
1457	4.13128
1458	1.62291
1459	-0.000685349
1460	-0.995126
1461	0.106914
1462	-1.16509
1463	0
1464	0
1465	-1.27201
1466	-1.38715
1467	5.32653
1468	3.48774
1469	1.72708
1470	-0.23576
1471	0.0301553
1472	0
1473	-0.0603107
1474	-0.273454
1475	0.398188
1476	0.0692202
1477	-0.603792
1478	0.594197
1479	-0.0328967
1480	0.243299
1481	-0.27551
1482	1.15481
1483	0.457813
1484	2.52551
1485	-1.11022e-16
1486	4.4253
1487	-1.74832
1488	-0.734009
1489	-1.32272
1490	0.0966342
1491	0.987588
1492	2.98332
1493	0.803914
1494	0.346101
1495	0.979363
1496	0.0472891
1497	4.38692
1498	5.06678
1499	6.75
1500	6.75
1501	6.75
1502	6.25381
1503	5.94403
1504	5.52186
1505	4.36224
1506	6.75
1507	6.75
1508	-0.9917
1509	-1.81138
1510	3.11217
1511	-1.04653
1512	-0.841608
1513	-0.188471
1514	-0.28442
1515	0
1516	0
1517	0
1518	0.211087
1519	5.55112e-17
1520	-0.690832
1521	-1.18428
1522	2.77556e-17
1523	-1.15892
1524	1.66533e-16
1525	0
1526	-1.41387
1527	0
1528	0
1529	0
1530	0
1531	0
1532	0
1533	-0.28442
1534	-1.21375
1535	-0.322799
1536	0.683293
1537	2.08689
1538	5.73843
1539	3.29858
1540	0
1541	6.06122
1542	4.95918
1543	1.72708
1544	2.28632
1545	-0.596939
1546	4.19776
1547	-1.30148
1548	-0.00548279
1549	-1.13973
1550	-0.0980049
1551	-0.4023
1552	-0.473576
1553	-0.0705909
1554	0
1555	4.16212
1556	5.55112e-17
1557	6.19898
1558	-0.204919
1559	5.64796
1560	0
1561	6.25381
1562	6.75
1563	6.75
1564	2.59884
1565	0.516068
1566	2.34184
1567	0.561301
1568	0.463981
1569	-0.218626
1570	-0.687405
1571	0.00205605
1572	-0.111712
1573	0
1574	0.370774
1575	-1.44403
1576	4.06343
1577	2.68725
1578	3.44388
1579	2.76401
1580	6.61567
1581	4.91327
1582	5.55112e-17
1583	6.19898
1584	6.03998
1585	1.51119
1586	3.53983
1587	6.25381
1588	5.06952
1589	5.55112e-17
1590	-1.11022e-16
1591	5.55112e-17
1592	6.75
1593	2.69822
1594	6.17157
1595	6.07288
1596	4.8228
1597	4.81458
1598	6.17157
1599	5.89194
1600	4.06343
1601	3.76462
1602	0.705224
1603	-1.32067
1604	-2.22045e-16
1605	-0.799802
1606	5.13532
1607	-1.84701
1608	6.75
1609	6.75
1610	6.75
1611	6.01531
1612	6.75
1613	2.42682
1614	6.75
1615	6.38265
1616	6.75
1617	0.384481
1618	5.83163
1619	6.75
1620	2.18558
1621	4.7618
1622	-0.348157
1623	-0.409839
1624	-0.407783
1625	1.06983
1626	3.12725
1627	-1.11022e-16
1628	2.6852
1629	6.46832
1630	0
1631	5.05102
1632	6.75
1633	6.56633
1634	6.56633
1635	5.87824
1636	-1.8196
1637	-0.279622
1638	0.224794
1639	0
1640	0
1641	0
1642	0
1643	0
1644	0.0191898
1645	1.24871
1646	6.42857
1647	6.75
1648	1.91966
1649	5.18466
1650	-1.13699
1651	-0.797061
1652	6.75
1653	6.75
1654	-1.55369
1655	-1.5482
1656	-1.10958
1657	0.151462
1658	0.115824
1659	0.617499
1660	-0.862854
1661	6.61567
1662	0.129531
1663	0.477688
1664	5.8097
1665	4.20599
1666	6.75
1667	6.75
1668	6.56633
1669	2.18558
1670	4.67202
1671	-0.85463
1672	-1.24939
1673	6.38265
1674	3.8496
1675	5.64796
1676	2.14446
1677	6.43474
1678	6.75
1679	-0.413265
1680	2.41311
1681	6.75
1682	6.38265
1683	4.11826
1684	4.58156
1685	6.07836
1686	5.64796
1687	4.72959
1688	6.61567
1689	6.56633
1690	6.01531
1691	6.38265
1692	6.56633
1693	6.75
1694	2.3857
1695	6.75
1696	-1.94289e-16
1697	2.31168
1698	6.56633
1699	2.37747
1700	5.64796
1701	2.89286
1702	3.72076
1703	6.75
1704	6.75
1705	2.70918
1706	3.75914
1707	6.75
1708	2.00739
1709	2.02658
1710	6.01531
1711	5.83163
1712	6.61567
1713	6.56633
1714	6.75
1715	6.56633
1716	0.718931
1717	6.75
1718	5.83163
1719	6.01531
1720	6.19898
1721	3.75914
1722	6.75
1723	6.38265
1724	-0.753198
1725	-0.865595
1726	4.67202
1727	1.08628
1728	6.0811
1729	-5.55112e-17
1730	-1.11022e-16
1731	0
1732	-1.11022e-16
1733	0
1734	3.03815
1735	6.75
1736	6.61567
1737	-1.11232
1738	-0.514697
1739	-0.357752
1740	0.255635
1741	-1.16989
1742	-1.55094
1743	-1.26858
1744	6.75
1745	6.75
1746	-0.295385
1747	4.41433
1748	1.74147
1749	4.53769
1750	6.07562
1751	4.73507
1752	2.6852
1753	6.75
1754	5.83163
1755	-0.159001
1756	-1.02528
1757	-0.807341
1758	2.42408
1759	5.71101
1760	0
1761	6.47449
1762	6.38265
1763	6.75
1764	4.88859
1765	5.57874
1766	6.19898
1767	0.501675
1768	6.75
1769	6.75
1770	2.91547
1771	2.80034
1772	0.732638
1773	-0.273454
1774	-0.627094
1775	-0.536628
1776	2.13897
1777	2.42682
1778	6.75
1779	6.01531
1780	6.75
1781	6.75
1782	-2.06907
1783	-1.84701
1784	5.26691
1785	-1.04104
1786	-1.42484
1787	0.729896
1788	3.81397
1789	4.7762
1790	0.892324
1791	-1.7216
1792	-0.520865
1793	-1.00061
1794	-0.723728
1795	-0.180932
1796	-0.359123
1797	-0.0466037
1798	0
1799	0.690832
1800	0
1801	1.11022e-16
1802	5.55112e-17
1803	5.55112e-17
1804	1.11022e-16
1805	-5.55112e-17
1806	-5.55112e-17
1807	-5.55112e-17
1808	-5.55112e-17
1809	-5.55112e-17
1810	8.32667e-17
1811	-0.0116509
1812	0.0328967
1813	-0.0411209
1814	0.060996
1815	-0.0205605
1816	0.0561986
1817	5.55112e-17
1818	0.0013707
1819	0.00411209
1820	0.00411209
1821	-0.00342674
1822	-0.00616814
1823	-0.000685349
1824	-6.245e-17
1825	-0.027414
1826	0.121307
1827	0.189156
1828	-0.305666
1829	0.346786
1830	0.123363
1831	-0.592827
1832	1.06298
1833	-0.414636
1834	-0.505102
1835	0.793634
1836	3.90443
1837	6.25381
1838	6.75
1839	6.75
1840	6.75
1841	3.43839
1842	1.31861
1843	2.70918
1844	-1.69898
1845	6.56633
1846	6.75
1847	5.3656
1848	4.11278
1849	0.672327
1850	3.15877
1851	1.26173
1852	3.30681
1853	0.200807
1854	0
1855	-0.706595
1856	-5.55112e-17
1857	0.912885
1858	-0.100746
1859	0.143238
1860	1.52216
1861	-1.13151
1862	-0.695629
1863	0.0013707
1864	6.13044
1865	6.61567
1866	6.43748
1867	6.56633
1868	0.590085
1869	0.211773
1870	1.66197
1871	0.234389
1872	8.32667e-17
1873	-0.174764
1874	0.858742
1875	1.28503
1876	6.61567
1877	1.99916
1878	2.21025
1879	6.75
1880	2.17187
1881	1.81001
1882	-0.46261
1883	-1.11022e-16
1884	5.55112e-17
1885	0.230963
1886	-0.336506
1887	0.469464
1888	1.03419
1889	6.75
1890	6.75
1891	6.43474
1892	6.61567
1893	0.24467
1894	-0.503731
1895	-0.224109
1896	-0.4818
1897	0
1898	0.453016
1899	2.1472
1900	1.09176
1901	-1.11022e-16
1902	3.41646
1903	0.241928
1904	4.11278
1905	-0.0541426
1906	2.32813
1907	6.75
1908	2.12801
1909	1.04242
1910	1.52216
1911	6.75
1912	6.75
1913	-2.12664
1914	4.51028
1915	-1.11022e-16
1916	1.492
1917	6.38265
1918	1.94433
1919	2.4323
1920	1.28366
1921	-1.69898
1922	-1.11022e-16
1923	-1.69898
1924	6.75
1925	6.75
1926	6.75
1927	6.75
1928	-5.55112e-17
1929	2.40763
1930	4.91327
1931	-2.25
1932	-1.87374
1933	-0.829272
1934	2.28906
1935	0
1936	0
1937	0
1938	5.39027
1939	-0.399558
1940	-0.643542
1941	0.154203
1942	2.45698
1943	3.4055
1944	6.75
1945	6.34701
1946	6.38265
1947	5.53556
1948	3.20538
1949	6.61567
1950	4.82006
1951	0.773759
1952	6.75
1953	3.30407
1954	2.14446
1955	0.162428
1956	-0.605163
1957	-0.158316
1958	5.55112e-17
1959	4.98728
1960	3.55627
1961	6.56633
1962	6.61567
1963	5.53282
1964	1.65101
1965	0
1966	6.07836
1967	2.09237
1968	4.2334
1969	-1.49063
1970	-1.75929
1971	3.06831
1972	0
1973	2.85448
1974	6.75
1975	6.38265
1976	6.75
1977	2.23492
1978	6.75
1979	6.61567
1980	4.92697
1981	6.38265
1982	-1.11022e-16
1983	2.60227
1984	-1.50708
1985	-0.30361
1986	4.2005
1987	2.78868
1988	4.75769
1989	5.92553
1990	-1.32889
1991	6.19898
1992	0
1993	0.576378
1994	5.42865
1995	1.27818
1996	1.54409
1997	6.75
1998	6.19898
1999	-1.53929
[truncated: 2,175 more rows]

## Sheet: 16S
Alignment index	Score		TwinCons > 5.5	TwinCons < -0.75
1	0		594	208
2	0
3	0.00753884
4	-1.11022e-16
5	-1.11022e-16
6	-1.11022e-16
7	-1.11022e-16
8	-1.09039
9	-0.870393
10	-1.49132
11	-2.25
12	-2.25
13	5.5383
14	-1.88265
15	6.75
16	6.25929
17	6.75
18	6.75
19	6.75
20	6.34701
21	5.13806
22	6.56633
23	6.56633
24	-1.88265
25	5.5383
26	-2.25
27	-2.25
28	6.01531
29	3.44388
30	0.381739
31	-1.54272
32	0.272083
33	-1.75929
34	-2.21642
35	-2.25
36	-2.06633
37	-2.25
38	-1.98134
39	-2.25
40	-2.25
41	-1.88814
42	-1.70172
43	5.59861
44	3.67415
45	-1.63319
46	-2.25
47	-0.0376942
48	0.505102
49	-1.64689
50	0
51	2.05125
52	6.75
53	3.98667
54	6.75
55	-1.18017
56	-1.91007
57	6.75
58	6.75
59	6.56633
60	6.75
61	4.91327
62	-0.229592
63	6.75
64	6.75
65	6.19898
66	4.54866
67	2.61598
68	1.88197
69	1.88814
70	1.41113
71	5.33681
72	5.55112e-17
73	0.602422
74	0.0013707
75	-5.55112e-17
76	0
77	-1.11022e-16
78	0.823104
79	-0.330338
80	0.212458
81	0.165169
82	0.00616814
83	0.00548279
84	-0.00479744
85	-0.015763
86	-0.0198751
87	5.55112e-17
88	5.55112e-17
89	-2.77556e-17
90	1.11022e-16
91	-1.11022e-16
92	-1.11022e-16
93	5.55112e-17
94	-1.11022e-16
95	5.55112e-17
96	0.666159
97	1.0664
98	0.106914
99	0.547594
100	5.55112e-17
101	-1.11022e-16
102	5.55112e-17
103	-1.11022e-16
104	-1.11022e-16
105	0
106	2.77556e-17
107	2.77556e-17
108	8.32667e-17
109	-0.0198751
110	-0.015763
111	-0.00205605
112	-0.0219312
113	0
114	0
115	-0.00342674
116	-0.0520865
117	-1.11022e-16
118	0.389278
119	-1.11022e-16
120	-0.0164484
121	5.55112e-17
122	1.73188
123	5.55112e-17
124	0.115139
125	0.294015
126	0
127	-0.547594
128	1.32204
129	2.03754
130	5.42591
131	6.38265
132	6.75
133	4.06343
134	0.321429
135	6.56633
136	5.48622
137	2.85174
138	6.56633
139	-2.25
140	6.61567
141	-0.440679
142	6.05094
143	0
144	6.56633
145	6.43474
146	6.75
147	6.38265
148	3.53434
149	1.76272
150	5.14012
151	3.61384
152	6.19898
153	2.25137
154	4.12648
155	-1.12329
156	1.11022e-16
157	-2.10128
158	6.75
159	0
160	1.65375
161	3.60836
162	6.56633
163	1.59069
164	4.95713
165	6.43748
166	2.88737
167	2.18284
168	-0.0185044
169	-0.202178
170	0.962915
171	4.46642
172	1.34397
173	0.754569
174	1.77711
175	4.54592
176	5.89194
177	2.85174
178	6.61567
179	4.43078
180	6.61567
181	4.18405
182	-0.0013707
183	0
184	0
185	0
186	0
187	0
188	0
189	0
190	0
191	0
192	0
193	0
194	0
195	0
196	0
197	0
198	0
199	0
200	0
201	0
202	0
203	0
204	0
205	0
206	0
207	0
208	0
209	0
210	0
211	0
212	0
213	0
214	0
215	0
216	0
217	5.48348
218	0.184359
219	0.420119
220	1.4783
221	0
222	1.8429
223	3.9949
224	6.56633
225	6.75
226	6.75
227	6.75
228	4.09907
229	0.705224
230	2.04851
231	0.721672
232	0.617499
233	4.74604
234	1.37687
235	6.25929
236	6.75
237	6.75
238	5.77955
239	0.321429
240	5.83163
241	4.37321
242	0.181617
243	1.22335
244	6.25929
245	6.56633
246	3.79203
247	0.0370088
248	0.855315
249	-0.254264
250	-0.0267286
251	-0.0705909
252	-0.090466
253	0.00890953
254	0
255	0.12679
256	-0.0774444
257	0.242613
258	-0.0925221
259	0.0397502
260	0.468779
261	-0.123363
262	0.0013707
263	5.55112e-17
264	2.45149
265	-0.690146
266	1.11022e-16
267	3.66045
268	-0.0150777
269	0.0013707
270	-0.0678495
271	0.640116
272	0.2947
273	0
274	0.183673
275	0.230277
276	0.0253579
277	0.0226165
278	0.0390649
279	-0.0383795
280	0.104858
281	-1.02186
282	-0.0925221
283	-0.00822419
284	2.02932
285	6.21269
286	-1.38778e-16
287	6.38265
288	6.38265
289	0.0164484
290	5.23949
291	-0.113768
292	0
293	-1.11022e-16
294	0.100746
295	-0.152833
296	-0.178191
297	0.0877246
298	5.55112e-17
299	-1.11022e-16
300	-1.11022e-16
301	-0.00890953
302	-0.2152
303	0.00205605
304	0.000685349
305	0.00616814
306	0.00479744
307	0
308	0
309	0
310	0
311	0
312	0
313	0
314	0
315	0
316	0
317	0
318	0
319	0
320	0
321	0
322	0
323	0
324	0
325	0
326	-0.00479744
327	-1.11022e-16
328	-1.11022e-16
329	-1.11022e-16
330	-1.11022e-16
331	-1.11022e-16
332	5.55112e-17
333	-1.11022e-16
334	-1.11022e-16
335	1.7497
336	2.09785
337	0.283049
338	0.17682
339	-1.11022e-16
340	-1.11022e-16
341	-1.11022e-16
342	-1.11022e-16
343	-1.11022e-16
344	-1.11022e-16
345	-1.11022e-16
346	-0.00342674
347	-0.00753884
348	0.00411209
349	-0.00411209
350	0.00342674
351	-0.15763
352	0.0383795
353	0.0548279
354	-0.131587
355	-0.258376
356	0.0424916
357	0.0472891
358	3.79752
359	5.79325
360	4.46642
361	0.919053
362	-0.555818
363	0.0692202
364	1.19593
365	3.28214
366	6.43748
367	6.25929
368	4.48835
369	3.60288
370	1.75244
371	4.62816
372	-1.25761
373	4.00586
374	0.551706
375	3.43017
376	3.61384
377	5.12161
378	-0.273454
379	2.67355
380	0.664103
381	1.35219
382	6.75
383	6.75
384	2.1938
385	6.75
386	0
387	6.56633
388	-0.553076
389	5.72472
390	2.56663
391	6.75
392	5.0942
393	3.25746
394	6.56633
395	5.28061
396	2.79143
397	5.14903
398	3.33422
399	4.62816
400	6.56633
401	6.75
402	6.61567
403	6.61567
404	0.532516
405	5.67537
406	5.83163
407	4.72959
408	2.59679
409	1.67019
410	3.62755
411	5.28061
412	6.56633
413	3.25746
414	5.0942
415	5.72472
416	-0.553076
417	6.56633
418	1.09998
419	4.38418
420	-0.106229
421	1.96627
422	6.75
423	2.1938
424	1.94708
425	0.779242
426	2.79965
427	6.56633
428	6.38265
429	0.269342
430	-1.73462
431	-1.17537
432	6.75
433	-2.15679
434	1.37687
435	-0.950579
436	6.75
437	6.75
438	3.9949
439	5.64796
440	6.75
441	6.75
442	-0.923165
443	1.37687
444	-2.2034
445	0
446	5.07775
447	5.23127
448	-1.7072
449	6.75
450	-1.17537
451	-1.74558
452	0.269342
453	-0.440679
454	6.61567
455	-2.25
456	5.64796
457	-0.114453
458	-1.73462
459	6.75
460	1.97449
461	-1.35082
462	2.89286
463	6.75
464	6.75
465	6.75
466	6.75
467	6.75
468	6.75
469	5.53556
470	6.75
471	0.137755
472	5.60684
473	3.44388
474	-1.35082
475	1.97723
476	6.75
477	-1.86346
478	-0.443421
479	-1.51531
480	-2.25
481	-1.88814
482	6.20378
483	6.19898
484	6.56633
485	6.75
486	6.19898
487	6.75
488	6.19898
489	6.43474
490	-1.88814
491	-2.25
492	6.56633
493	6.56633
494	6.48134
495	4.91327
496	6.75
497	6.56633
498	6.75
499	-1.71543
500	-1.45225
501	5.33544
502	-1.88265
503	6.75
504	6.38265
505	6.75
506	-1.88265
507	0.806655
508	-1.88265
509	6.75
510	-0.542111
511	0.348843
512	1.45637
513	6.75
514	6.38265
515	5.64796
516	6.75
517	6.38265
518	-2.06633
519	3.69609
520	2.13623
521	5.55112e-17
522	6.56633
523	2.25959
524	5.94677
525	6.25381
526	2.42134
527	3.69609
528	-2.06633
529	2.34184
530	6.75
531	6.75
532	1.45637
533	0.266601
534	-0.50099
535	-1.88265
536	6.75
537	-0.780612
538	-0.341989
539	6.75
540	0.79569
541	-1.65238
542	5.43413
543	4.71588
544	4.64735
545	-2.25
546	6.48134
547	6.75
548	6.75
549	-1.23568
550	-1.3426
551	-0.0459184
552	1.2398
553	-1.83673
554	0
555	1.21238
556	-1.57425
557	-0.161742
558	0.218626
559	0.0459184
560	-1.11022e-16
561	1.11022e-16
562	-0.0116509
563	0.659306
564	1.28708
565	-0.649711
566	-0.693573
567	2.22045e-16
568	-2.22045e-16
569	0.213143
570	0.0459184
571	-0.183673
572	-1.28571
573	-0.826531
574	-1.69898
575	-0.229592
576	-0.753198
577	-1.3426
578	-1.24939
579	6.56633
580	6.61567
581	3.00525
582	6.48134
583	1.90458
584	-0.503731
585	-0.0486598
586	0.329653
587	0.08841
588	0.721672
589	2.12801
590	-1.8196
591	-1.88265
592	-1.90184
593	0
594	-1.11022e-16
595	5.55112e-17
596	1.11022e-16
597	0
598	-1.11022e-16
599	-2.77556e-17
600	2.77556e-17
601	-1.11022e-16
602	-5.55112e-17
603	-5.55112e-17
604	0
605	0
606	8.32667e-17
607	0
608	-1.11022e-16
609	-2.77556e-17
610	0
611	-1.11022e-16
612	1.53861
613	3.2931
614	0.919053
615	5.55112e-17
616	-8.32667e-17
617	-5.55112e-17
618	-5.55112e-17
619	5.55112e-17
620	-1.11022e-16
621	-5.55112e-17
622	-5.55112e-17
623	-2.77556e-17
624	-1.11022e-16
625	-5.55112e-17
626	-2.77556e-17
627	-8.32667e-17
628	5.55112e-17
629	1.11022e-16
630	-1.11022e-16
631	0
632	0
633	0
634	2.22045e-16
635	-0.407783
636	-0.768961
637	-0.229592
638	2.34184
639	0.702482
640	0.170652
641	0.483171
642	-0.237816
643	-0.4818
644	2.6571
645	-0.00342674
646	6.44776
647	3.12108
648	0.30498
649	6.34701
650	6.75
651	6.75
652	0.28579
653	-0.898492
654	1.24254
655	-0.352955
656	6.75
657	6.75
658	-2.25
659	-1.47144
660	6.56633
661	6.75
662	0
663	0
664	-1.89979
665	-2.06633
666	0.192583
667	-2.25
668	6.56633
669	6.75
670	6.75
671	3.44388
672	6.75
673	6.75
674	6.75
675	6.56633
676	-1.69898
677	6.75
678	6.75
679	6.61567
680	6.56633
681	6.75
682	6.75
683	6.75
684	6.38265
685	6.48134
686	6.75
687	2.25137
688	6.75
689	6.56633
690	-2.25
691	0.269342
692	-1.94296
693	-2.11567
694	0.825845
695	1.24254
696	-0.898492
697	0.151462
698	6.75
699	1.06709
700	6.75
701	6.48134
702	-1.51531
703	6.38265
704	-2.25
705	6.38265
706	0.176135
707	-1.59755
708	0.516068
709	3.44388
710	1.62359
711	-2.06633
712	-1.81686
713	1.92514
714	6.38265
715	5.13806
716	6.75
717	1.76889
718	6.75
719	6.75
720	5.83163
721	6.75
722	4.75701
723	-2.14034
724	6.75
725	6.75
726	6.61567
727	6.75
728	6.75
729	2.07318
730	6.38265
731	1.08902
732	-1.5016
733	5.13806
734	6.61567
735	3.66045
736	6.75
737	6.56633
738	-2.25
739	3.42469
740	5.4451
741	6.75
742	0.362549
743	1.45362
744	0.669586
745	0.335136
746	0.184359
747	2.6708
748	4.1539
749	4.29097
750	5.83163
751	5.08871
752	3.78381
753	-0.849147
754	-1.40291
755	-1.24939
756	0.118565
757	3.90717
758	1.97449
759	2.01287
760	6.61567
761	6.75
762	6.75
763	1.94159
764	4.22518
765	2.98606
766	0.0966342
767	0.156945
768	0.450274
769	1.56054
770	0
771	6.19898
772	6.06122
773	5.71924
774	2.32265
775	6.56633
776	6.56633
777	6.19898
778	1.4125
779	-0.174764
780	0.362549
781	0.08841
782	2.97784
783	-0.210402
784	0.595568
785	1.27612
786	0
787	2.15474
788	2.6571
789	3.40002
790	-0.190527
791	-0.939613
792	-1.36727
793	-0.163798
794	3.86879
795	4.71863
796	1.19593
797	6.75
798	6.56633
799	4.75975
800	4.04973
801	0.0801858
802	0.170652
803	0.557189
804	0
805	2.26782
806	0.784724
807	6.75
808	6.75
809	1.57699
810	6.75
811	-1.22472
812	4.90504
813	-1.65238
814	-0.144609
815	2.6571
816	2.45149
817	4.87489
818	-0.139126
819	5.71101
820	6.38265
821	3.53983
822	4.71588
823	5.71101
824	-0.750457
825	-0.366662
826	1.93885
827	1.85661
828	-1.36727
829	4.5048
830	6.75
831	-2.06633
832	6.75
833	-0.555818
834	4.72959
835	2.45698
836	4.32661
837	0.0582546
838	1.29462
839	6.19898
840	-2.23903
841	6.75
842	5.08323
843	6.75
844	6.30864
845	-0.980734
846	3.34519
847	6.75
848	4.72959
849	4.91875
850	5.8097
851	6.61567
852	6.75
853	6.75
854	-0.829957
855	5.08049
856	-0.561301
857	-0.692888
858	-1.40565
859	-0.336506
860	6.75
861	3.66045
862	-2.06633
863	-1.46322
864	0.962915
865	0.263859
866	4.92149
867	2.59953
868	2.32265
869	3.34519
870	6.75
871	6.75
872	-2.25
873	4.02231
874	4.93794
875	6.34701
876	6.61567
877	0.573637
878	3.40276
879	6.0482
880	5.86727
881	6.61567
882	6.30864
883	6.75
884	6.01531
885	6.75
886	3.85783
887	6.30864
888	6.61567
889	3.40276
890	-0.851889
891	1.85661
892	1.93063
893	-0.380369
894	-0.772388
895	5.71101
896	2.85448
897	1.26995
898	5.71375
899	0.54074
900	-1.33163
901	1.91418
902	2.31991
903	-0.85463
904	-0.629836
905	-1.73736
906	4.75426
907	-1.22472
908	6.56633
909	6.75
910	6.75
911	3.76188
912	-2.25
913	6.56633
914	4.06892
915	6.75
916	4.60075
917	5.77955
918	-1.54546
919	1.08902
920	6.19898
921	6.75
922	6.75
923	6.61567
924	4.84199
925	6.56633
926	6.07836
927	-1.63867
928	-1.59207
929	6.75
930	6.75
931	6.56633
932	3.97845
933	4.17857
934	3.8825
935	6.56633
936	2.05673
937	6.75
938	6.56633
939	4.68573
940	-1.58932
941	6.75
942	6.61567
943	6.61567
944	6.75
945	6.75
946	6.75
947	6.75
948	6.75
949	6.25929
950	6.75
951	6.75
952	6.61567
953	6.75
954	-1.58932
955	4.5514
956	6.75
957	6.75
958	6.75
959	6.56633
960	6.56633
961	6.75
962	6.75
963	-1.59207
964	-1.63867
965	6.07836
966	6.43474
967	1.31107
968	5.13806
969	6.75
970	6.25929
971	6.75
972	6.75
973	6.38265
974	4.81732
975	4.25533
976	6.75
977	6.56633
978	-1.29325
979	0.170652
980	-0.613387
981	1.65101
982	4.60075
983	6.17157
984	3.74817
985	4.87489
986	1.97175
987	3.70431
988	5.63151
989	4.75701
990	1.11369
991	2.23766
992	2.20203
993	1.02048
994	-0.295385
995	0.199436
996	0.184359
997	-0.121992
998	0
999	0
1000	1.9738
1001	0.75731
1002	0.153518
1003	1.07805
1004	2.63722
1005	0
1006	0
1007	0.826531
1008	0.809397
1009	0.204919
1010	0.0692202
1011	0.398188
1012	-0.566783
1013	1.54409
1014	0.65862
1015	5.54104
1016	5.13258
1017	-1.11022e-16
1018	3.79478
1019	1.63182
1020	4.55963
1021	5.49718
1022	0.236445
1023	6.48134
1024	6.43474
1025	-0.843664
1026	-1.5811
1027	6.75
1028	6.75
1029	-2.15131
1030	-0.810768
1031	4.89956
1032	2.75579
1033	4.21147
1034	3.92088
1035	6.75
1036	6.75
1037	4.60075
1038	1.65101
1039	-0.701112
1040	0.170652
1041	-1.29325
1042	6.56633
1043	5.55112e-17
1044	6.75
1045	4.75701
1046	6.75
1047	5.83163
1048	6.75
1049	6.75
1050	6.30864
1051	6.75
1052	2.59405
1053	6.75
1054	6.61567
1055	6.75
1056	6.75
1057	5.84534
1058	6.25929
1059	2.72289
1060	1.85387
1061	5.94677
1062	6.75
1063	6.75
1064	6.75
1065	6.75
1066	6.30315
1067	2.22396
1068	-0.320058
1069	5.55112e-17
1070	6.38265
1071	1.64552
1072	6.75
1073	0
1074	0
1075	0
1076	0
1077	0
1078	0
1079	0
1080	0
1081	0
1082	0
1083	0
1084	0
1085	0
1086	0
1087	0
1088	0
1089	0
1090	0
1091	0
1092	0
1093	0
1094	0
1095	0
1096	0
1097	0
1098	0
1099	0
1100	0
1101	0
1102	0
1103	6.56633
1104	6.75
1105	6.75
1106	6.75
1107	-2.25
1108	6.75
1109	6.75
1110	6.75
1111	5.13806
1112	6.34701
1113	6.75
1114	6.75
1115	6.75
1116	6.25929
1117	6.75
1118	-1.88265
1119	6.75
1120	6.75
1121	6.75
1122	6.75
1123	6.56633
1124	4.88859
1125	-2.06907
1126	-2.25
1127	6.48134
1128	-2.11567
1129	6.61567
1130	0
1131	6.19898
1132	6.56633
1133	6.56633
1134	6.75
1135	2.15816
1136	-0.983475
1137	5.99612
1138	6.75
1139	4.04973
1140	6.75
1141	4.36224
1142	6.19898
1143	0
1144	4.50206
1145	4.23888
1146	-2.20614
1147	6.56633
1148	6.61567
1149	-1.71269
1150	6.75
1151	6.75
1152	3.72076
1153	6.75
1154	5.28061
1155	6.75
1156	6.75
1157	6.75
1158	6.19898
1159	-2.11567
1160	6.43748
1161	6.75
1162	-0.141867
1163	-2.25
1164	5.90839
1165	5.51363
1166	6.75
1167	6.61567
1168	6.00434
1169	6.75
1170	-2.11567
1171	-1.78945
1172	-1.57836
1173	1.91418
1174	4.17857
1175	6.75
1176	-0.0459184
1177	0
1178	0
1179	0
1180	0
1181	0
1182	0
1183	0
1184	0
1185	0
1186	0
1187	0
1188	0
1189	0
1190	0
1191	0
1192	0
1193	0
1194	0
1195	0
1196	0
1197	0
1198	0
1199	0
1200	0
1201	0
1202	0
1203	0
1204	0
1205	0
1206	0
1207	6.75
1208	6.75
1209	0
1210	1.2398
1211	6.75
1212	-1.11022e-16
1213	6.75
1214	6.75
1215	-1.10136
1216	2.85448
1217	2.12801
1218	0.335136
1219	-0.997182
1220	0
1221	0
1222	-2.21436
1223	-2.22045e-16
1224	-2.21642
1225	6.43474
1226	-2.25
1227	-0.780612
1228	5.55112e-17
1229	-1.12603
1230	0.510585
1231	-0.432455
1232	-0.0013707
1233	0.908087
1234	1.76889
1235	0
1236	0
1237	0
1238	4.33209
1239	1.2535
1240	-2.77556e-17
1241	-5.55112e-17
1242	-0.130902
1243	-0.00479744
1244	1.30285
1245	-0.235075
1246	-1.22472
1247	-1.6606
1248	-0.358437
1249	0
1250	-2.25
1251	-0.964286
1252	0
1253	-0.983475
1254	-2.11567
1255	0
1256	-0.00753884
1257	-1.64963
1258	-0.476317
1259	-0.396817
1260	-1.11022e-16
1261	0.801173
1262	-0.388593
1263	-0.509214
1264	-0.0027414
1265	-0.16654
1266	1.11022e-16
1267	0
1268	0
1269	1.11022e-16
1270	0
1271	-2.77556e-17
1272	-5.55112e-17
1273	-5.55112e-17
1274	-5.55112e-17
1275	-2.77556e-16
1276	-5.55112e-17
1277	0
1278	1.11022e-16
1279	-5.55112e-17
1280	-5.55112e-17
1281	-2.77556e-17
1282	0
1283	0
1284	2.22045e-16
1285	5.55112e-17
1286	-1.11022e-16
1287	0.0280993
1288	0
1289	-0.459869
1290	0.590085
1291	0
1292	-0.235075
1293	1.03419
1294	-1.35356
1295	-0.450959
1296	1.31655
1297	6.21269
1298	-2.24452
1299	6.19898
1300	6.75
1301	6.56633
1302	0.688776
1303	6.56633
1304	0.647655
1305	6.75
1306	6.75
1307	6.75
1308	6.75
1309	6.34701
1310	6.75
1311	6.75
1312	4.8694
1313	-1.67979
1314	6.19898
1315	3.9949
1316	6.75
1317	6.56633
1318	2.89286
1319	6.56633
1320	6.56633
1321	6.56633
1322	3.58643
1323	6.56633
1324	6.38265
1325	6.75
1326	6.75
1327	1.97449
1328	-0.503731
1329	3.71802
1330	6.56633
1331	6.56633
1332	6.19898
1333	6.19898
1334	3.71802
1335	-0.235075
1336	1.97449
1337	4.36224
1338	6.56633
1339	-1.34534
1340	-2.11841
1341	-0.964286
1342	5.27239
1343	6.75
1344	6.75
1345	6.56633
1346	6.75
1347	6.75
1348	6.75
1349	5.27239
1350	-0.964286
1351	-2.11567
1352	5.83712
1353	3.63303
1354	6.75
1355	6.75
1356	6.75
1357	6.38265
1358	6.56633
1359	5.3656
1360	6.56633
1361	6.38265
1362	-1.76477
1363	-2.25
1364	6.75
1365	6.01531
1366	6.75
1367	6.56633
1368	-1.33986
1369	1.49475
1370	2.34732
1371	0.20629
1372	4.11552
1373	0
1374	1.45911
1375	-0.0678495
1376	1.96627
1377	4.00586
1378	4.02779
1379	6.75
1380	6.64925
1381	4.61514
1382	5.98035
1383	2.6852
1384	6.51355
1385	0.907402
1386	4.88517
1387	0
1388	0.970454
1389	0
1390	0
1391	0
1392	0
1393	0
1394	0
1395	0.148035
1396	0.221368
1397	-0.00685349
1398	0.0424916
1399	0.0644228
1400	0
1401	4.05795
1402	0.302239
1403	0
1404	0
1405	-0.986217
1406	1.33506
1407	0
1408	0.0376942
1409	0.0664788
1410	-0.00479744
1411	0.00959488
1412	2.12732
1413	-0.296071
1414	0
1415	0
1416	0
1417	0
1418	0
1419	0
1420	0
1421	0
1422	0.882729
1423	5.02087
1424	4.51097
1425	5.98035
1426	1.11095
1427	6.25381
1428	5.89194
1429	0.505102
1430	3.69883
1431	4.41433
1432	2.09785
1433	0.576378
1434	1.54135
1435	4.95439
1436	0.104858
1437	4.86392
1438	6.75
1439	6.56633
1440	2.48439
1441	6.75
1442	6.75
1443	5.96322
1444	2.45972
1445	1.7497
1446	0.765535
1447	5.82889
1448	0.0260433
1449	0
1450	1.15961
1451	5.95225
1452	6.75
1453	1.14659
1454	1.14659
1455	2.52825
1456	6.0811
1457	5.55112e-17
1458	6.75
1459	6.75
1460	6.56633
1461	6.75
1462	6.75
1463	6.61567
1464	6.56633
1465	6.75
1466	0.0555133
1467	4.54592
1468	0.502361
1469	6.56633
1470	6.56633
1471	-1.88265
1472	-1.17537
1473	-0.229592
1474	6.75
1475	6.30864
1476	6.75
1477	-2.25
1478	2.52551
1479	6.48134
1480	-1.67979
1481	4.8694
1482	6.75
1483	6.43748
1484	3.19715
1485	-1.04104
1486	0.505102
1487	6.61567
1488	5.79051
1489	6.75
1490	0.546908
1491	6.43748
1492	6.43474
1493	6.34701
1494	-1.34534
1495	-2.25
1496	0
1497	6.43474
1498	0.724414
1499	-0.769647
1500	-0.169281
1501	2.02109
1502	2.78868
1503	-1.10136
1504	6.75
1505	6.75
1506	6.75
1507	6.75
1508	3.11217
1509	3.72076
1510	6.75
1511	6.75
1512	6.61567
1513	-1.71269
1514	6.75
1515	6.07836
1516	-2.02795
1517	4.49109
1518	4.50206
1519	6.19898
1520	4.36224
1521	6.75
1522	6.75
1523	6.75
1524	6.19898
1525	6.75
1526	5.69456
1527	0.688776
1528	0.121307
1529	1.99094
1530	2.33087
1531	0.428343
1532	6.38265
1533	6.61567
1534	6.75
1535	2.33635
1536	-0.901234
1537	5.88372
1538	3.73721
1539	6.64925
1540	0.664788
1541	0
1542	0.996497
1543	1.42347
1544	6.56633
1545	0.535257
1546	5.83163
1547	-0.651767
1548	1.00129
1549	3.14232
1550	3.06831
1551	6.75
1552	-2.21984
1553	0.143238
1554	6.75
1555	3.3726
1556	4.14567
1557	1.2398
1558	2.82981
1559	1.4125
1560	4.27726
1561	6.75
1562	1.45088
1563	0.230963
1564	6.07836
1565	6.75
1566	5.75213
1567	6.75
1568	1.58795
1569	5.72746
1570	0
1571	-0.583232
1572	0.304295
1573	-5.55112e-17
1574	6.75
1575	6.75
1576	6.38265
1577	-0.805285
1578	2.27056
1579	2.07592
1580	0.145979
1581	0.812138
1582	1.53038
1583	6.75
1584	1.23705
1585	1.70583
1586	6.19898
1587	6.56633
1588	6.56633
1589	3.17248
1590	2.34184
1591	5.15725
1592	5.64796
1593	6.75
1594	6.0811
1595	2.19928
1596	6.75
1597	-1.00541
1598	-1.21924
1599	4.8694
1600	-0.0925221
1601	5.64796
1602	6.75
1603	6.75
1604	1.37412
1605	6.75
1606	6.75
1607	6.75
1608	4.91875
1609	6.75
1610	5.83163
1611	-0.273454
1612	4.8694
1613	-1.21924
1614	-0.914941
1615	6.75
1616	2.19928
1617	6.0811
1618	6.61567
1619	6.75
1620	6.19898
1621	2.34184
1622	-0.514697
1623	0.784724
1624	6.75
1625	6.75
1626	6.75
1627	4.04973
1628	6.75
1629	5.99612
1630	-0.983475
1631	2.15816
1632	6.75
1633	6.75
1634	6.75
1635	6.75
1636	6.75
1637	5.83163
1638	2.87093
1639	6.30589
1640	6.75
1641	3.79752
1642	3.07379
1643	-0.476317
1644	-1.42758
1645	6.61567
1646	6.38265
1647	6.56633
1648	-0.964286
1649	2.35006
1650	-8.32667e-17
1651	6.61567
1652	0
1653	2.19928
1654	-1.11022e-16
1655	-1.08491
1656	-0.517438
1657	3.07379
1658	3.79752
1659	6.75
1660	6.30589
1661	6.38265
1662	5.83163
1663	6.75
1664	6.75
1665	6.75
1666	6.38265
1667	5.23127
1668	4.84199
1669	6.56633
1670	6.19898
1671	-2.06633
1672	6.38265
1673	6.07836
1674	-1.93748
1675	6.48134
1676	-2.25
1677	-2.06907
1678	4.77345
1679	6.38265
1680	6.75
1681	6.75
1682	6.75
1683	-1.88265
1684	6.75
1685	6.75
1686	6.25929
1687	6.75
1688	6.75
1689	6.75
1690	6.25929
1691	6.75
1692	6.75
1693	6.75
1694	6.56633
1695	6.75
1696	6.75
1697	6.75
1698	3.44388
1699	1.84564
1700	1.31655
1701	4.18405
1702	6.75
1703	6.75
1704	0.590085
1705	-1.82508
1706	-1.7401
1707	3.98393
1708	6.75
1709	5.95774
1710	2.60227
1711	0.483171
1712	2.35829
1713	4.11826
1714	-0.517438
1715	1.13836
1716	-0.30361
1717	0.820362
1718	0
1719	0.228221
1720	-1.97038
1721	-1.84976
1722	-0.407783
1723	6.04272
1724	0
1725	6.61567
1726	6.43748
1727	-0.851889
1728	0
1729	1.27955
1730	-0.864225
1731	-0.045233
1732	0.577064
1733	-1.11022e-16
1734	0
1735	0.777871
1736	-0.127475
1737	0.812824
1738	0.209717
1739	0
1740	0
1741	-1.66533e-16
1742	0.579805
1743	0.090466
1744	0.0013707
1745	-0.0013707
1746	0
1747	0
1748	0
1749	0
1750	0
1751	0
1752	0
1753	0
1754	0.307036
1755	0.975251
1756	0.34473
1757	0.522236
1758	0
1759	0
1760	-0.00685349
1761	-0.0027414
1762	0.509899
1763	0.842979
1764	-0.0411209
1765	1.52696
1766	2.92507
1767	0.995126
1768	0.00342674
1769	-0.679866
1770	2.0862
1771	-0.232333
1772	-0.988958
1773	1.36316
1774	-0.396817
1775	6.17979
1776	0.0938928
1777	6.75
1778	0.834069
1779	-1.81686
1780	-1.88814
1781	3.12039
1782	1.54957
1783	1.41525
1784	3.19989
1785	-0.758681
1786	2.20477
1787	1.27543
1788	0.0500305
1789	1.91692
1790	1.20964
1791	2.59405
1792	6.75
1793	-1.7401
1794	-1.64689
1795	3.61384
1796	6.75
1797	6.75
1798	4.34031
1799	1.50571
1800	1.84564
1801	6.75
1802	6.75
1803	6.56633
1804	6.75
1805	6.75
1806	6.56633
1807	6.38265
1808	6.01531
1809	6.75
1810	6.75
1811	6.75
1812	6.75
1813	6.75
1814	6.75
1815	6.75
1816	5.83163
1817	4.40062
1818	6.75
1819	6.04546
1820	6.34701
1821	6.75
1822	6.75
1823	1.85935
1824	2.09511
1825	6.61567
1826	6.75
1827	6.75
1828	6.75
1829	0.694258
1830	1.8292
1831	6.75
1832	6.38265
1833	5.54104
1834	6.30589
1835	6.75
1836	4.41707
1837	5.83163
1838	6.38265
1839	6.75
1840	6.75
1841	6.34701
1842	6.61567
1843	6.56633
1844	6.56633
1845	6.56633
1846	6.75
1847	6.56633
1848	6.2449
1849	4.86735
1850	-0.0013707
1851	0.00205605

## Sheet: 5S
Alignment index	Score		TwinCons > 5.5	TwinCons < -0.75
1	0.068097		19	4
2	-0.0130597
3	0.824627
4	-0.489739
5	0.298507
6	2.65299
7	2.76119
8	0.104478
9	5.94403
10	2.29478
11	2.83209
12	1.24254
13	5.67537
14	4.5
15	4.20522
16	0
17	5.58955
18	4.07463
19	3.16045
20	-0.324627
21	0
22	0
23	0
24	5.55112e-17
25	-0.357276
26	0.787313
27	1.09701
28	3.73507
29	5.72015
30	0
31	0.365672
32	0.873134
33	1.45522
34	5.54104
35	4.11194
36	6.25
37	5.54104
38	2.39179
39	3.89552
40	0.503731
41	0.809701
42	-1.11022e-16
43	4.73507
44	2.97388
45	0
46	6.75
47	4.72388
48	6.5
49	1.28265
50	2.59328
51	6.1875
52	6.75
53	6.61567
54	5.5
55	6.61567
56	0.257463
57	0
58	4.6791
59	2.63806
60	5.40672
61	2.07836
62	3.05597
63	6.25
64	4.11194
65	1.3806
66	6.75
67	6.75
68	1.6791
69	4.23881
70	0.936567
71	1
72	-0.328358
73	-0.268657
74	2.44403
75	1.11022e-16
76	0.507463
77	1.21269
78	3.5597
79	3.96642
80	-1.45896
81	-0.600746
82	0.865672
83	-0.996269
84	-0.537313
85	2.1903
86	0
87	0
88	0
89	0
90	3.23507
91	5
92	5.5
93	2.34701
94	6.61567
95	3.17537
96	-0.257463
97	1.16045
98	1.11567
99	-1.18097
100	0.455224
101	-0.0223881
102	0.455224
103	0.227612
104	5.55112e-17
105	-0.529851
106	0.843284
107	0.00279851
108	-0.0895522
109	0.830224
110	1.27612
111	1.01866
112	-0.179104
113	1.38806
114	6.5
115	-1.11022e-16
116	1.72761
117	3.55597
118	5
119	0
120	0.231343
121	-1.70522
122	-0.399254
123	0.466418
124	-0.746269
125	1.41045
126	-0.00373134
127	1.28358
128	2.38806
129	3.19776
130	1.97761
131	1.89179
132	5.87687
133	3.21642
134	2.21269
135	1.6306
136	-0.695896
137	-0.100746
138	0.350746
139	-0.0214552
140	0.0615672
141	0.0317164
142	5.37764e-17
143	1.12757e-16
144	-0.00186567

## Sheet: casp9-mcasp
Alignment index	Score		TwinCons > 5.65	TwinCons < -0.9
1	0		5	84
2	0
3	0
4	0
5	0
6	0
7	0
8	0
9	0
10	0
11	0
12	0
13	0
14	0
15	0
16	0
17	0
18	0
19	0
20	0
21	0
22	-0.562165
23	-2.19022
24	-1.42796
25	-0.311479
26	-1.14593
27	0
28	0
29	0
30	0
31	0
32	0
33	0
34	0
35	0
36	0
37	0
38	-1.37793
39	-0.425243
40	-1.10404
41	-1.04995
42	-1.00064
43	-0.0252169
44	-1.17354
45	0
46	0
47	0
48	0
49	0
50	0
51	0
52	0
53	0
54	0
55	0
56	0
57	0
58	0
59	0
60	0
61	0
62	0
63	0
64	0
65	0
66	0
67	0
68	0
69	0
70	0
71	0
72	0
73	0
74	0
75	0
76	0
77	0
78	0
79	0
80	0
81	0
82	0
83	0
84	0
85	0
86	0
87	0
88	0
89	0
90	0
91	0
92	0
93	0
94	0
95	0
96	0
97	0
98	0
99	0
100	0
101	0
102	0
103	0
104	0
105	0
106	0
107	0
108	-0.357872
109	-0.57854
110	-0.635138
111	-1.50883
112	0.399976
113	-0.300687
114	-0.627766
115	-0.31919
116	-0.0941653
117	-0.00826263
118	-1.22572
119	-1.72503
120	-1.4053
121	-0.673011
122	-0.459751
123	0.459307
124	0
125	-1.02308
126	-0.75238
127	1.2971
128	0
129	0
130	0
131	0
132	0
133	0
134	0
135	0
136	0
137	-0.611485
138	-1.79904
139	-0.057711
140	-1.27387
141	-0.717677
142	0
143	0
144	0
145	0
146	-1.98336
147	-0.205546
148	-1.44097
149	-0.0615314
150	0
151	-0.814439
152	-0.744637
153	-0.205944
154	-0.999309
155	-0.274326
156	0
157	0
158	0
159	0
160	0
161	0
162	0
163	0
164	0
165	0
166	0
167	0
168	-2.30768
169	-0.970465
170	-1.18392
171	1.11118
172	-1.23289
173	0
174	0
175	-0.238373
176	-1.06859
177	-0.081067
178	-0.452968
179	-1.98665
180	-0.525143
181	-0.852191
182	-0.161385
183	-0.522398
184	-0.673307
185	0
186	0
187	0
188	0
189	0
190	0
191	0
192	-0.79968
193	-0.766857
194	-0.140155
195	0
196	0
197	0
198	0
199	0
200	0
201	0
202	0
203	0
204	-1.41168
205	0
206	0
207	-0.0678365
208	0
209	0
210	0
211	0
212	0
213	0
214	-0.880109
215	-0.694708
216	0.900408
217	-1.39671
218	-0.570215
219	0
220	0
221	0
222	0
223	0
224	0
225	0
226	0
227	0
228	0
229	0
230	0
231	0
232	0
233	0
234	0
235	0
236	0
237	0
238	0
239	0
240	0
241	0
242	0
243	-1.04957
244	0
245	0
246	0
247	0
248	0
249	0
250	0
251	0
252	0
253	0
254	0
255	0
256	0
257	0
258	0
259	0
260	0
261	0
262	0
263	0
264	0
265	0
266	0
267	0
268	0
269	0
270	0
271	0
272	0
273	0
274	0
275	0
276	0
277	0
278	0
279	0
280	0
281	0
282	0
283	0
284	0
285	-0.403206
286	-1.0247
287	-0.36831
288	-1.01275
289	0
290	0
291	0
292	0
293	0
294	0
295	0
296	0
297	0
298	0
299	-0.743903
300	0
301	-1.1969
302	-0.764896
303	-1.26563
304	-0.358942
305	0
306	0
307	0
308	0
309	0
310	0
311	-0.447501
312	-0.677324
313	-1.07395
314	-1.03143
315	-0.924494
316	-0.947819
317	0
318	0
319	0
320	0
321	0
322	0
323	0
324	0
325	0
326	0
327	0
328	-0.999316
329	0
330	0.131849
331	-0.45625
332	-0.643936
333	-0.850999
334	-0.242939
335	-1.01031
336	-0.837233
337	-0.76477
338	0
339	0
340	0
341	0
342	0
343	0
344	0
345	0
346	0
347	0
348	0
349	0
350	0
351	0
352	0
353	0
354	0
355	0.431461
356	-0.247677
357	0.513595
358	-0.136795
359	0
360	0
361	-1.20861
362	0.336984
363	1.45242
364	0
365	0
366	0.0482276
367	0
368	-0.377882
369	1.37328
370	0.127819
371	-1.28647
372	-0.918195
373	-2.41416
374	0
375	0
376	3.33045
377	3.55141
378	3.02198
379	2.41158
380	0.556805
381	-1.46437
382	-1.66378
383	0.209757
384	0.532093
385	0
386	0.144119
387	0.166007
388	-0.568909
389	0.546938
390	-0.125553
391	5.64122
392	1.60022
393	0
394	0
395	0
396	4.18213
397	3.27058
398	-1.57687
399	-0.889276
400	7.44391
401	1.38361
402	-0.506002
403	0.397736
404	3.13394
405	0.906411
406	0.926473
407	-1.45535
408	1.78338
409	0
410	0.707884
411	-0.0934139
412	0.479998
413	0.575282
414	4.90445
415	0
416	0
417	0
418	-0.304629
419	2.50399
420	-0.782399
421	3.00375
422	-0.781762
423	0.32055
424	0
425	0
426	0
427	0
428	0
429	0
430	0
431	0
432	0
433	0
434	-2.31141
435	-1.2567
436	3.79999
437	-0.236309
438	0.69727
439	0.668042
440	3.72376
441	0.145399
442	0.336194
443	2.21238
444	2.36663
445	0.0821229
446	-3.02437
447	2.75704
448	0.955372
449	0
450	2.04567
451	2.02665
452	-0.223681
453	0.494815
454	0.803009
455	-1.971
456	4.07015
457	2.50017
458	1.076
459	1.20157
460	0.0452787
461	-1.72624
462	-1.67831
463	-1.98945
464	1.67574
465	7.04467
466	6.55302
467	1.63299
468	2.2561
469	0.464924
470	-0.185125
471	0
472	0
473	0
474	0
475	0
476	0
477	0
478	0
479	0
480	0
481	0
482	0
483	-0.783843
484	-4.43432
485	0
486	-0.354939
487	2.52926
488	-1.19546
489	0.451067
490	1.63563
491	2.47537
492	3.60391
493	-1.63803
494	0.859603
495	4.46517
496	0
497	0
498	0
499	0
500	2.34604
501	1.19497
502	-2.83746
503	2.91475
504	-0.460766
505	0
506	2.84864
507	-1.5876
508	3.43538
509	-0.664366
510	1.13306
511	0
512	0.660014
513	1.52489
514	0
515	0
516	0
517	0
518	0
519	0
520	0
521	0
522	0
523	0
524	0
525	0
526	0
527	-0.595754
528	3.381
529	-0.384587
530	-0.0677094
531	-1.08853
532	-0.794227
533	-1.12113
534	1.2148
535	2.09946
536	0.565336
537	4.06205
538	9.57933
539	0
540	1.38355
541	3.61811
542	-0.428328
543	-1.39124
544	0.556301
545	4.56604
546	0.00621415
547	-3.37314
548	2.62252
549	-1.76591
550	-1.17157
551	0.450398
552	0.15251
553	0.0790922
554	-0.200756
555	0
556	0
557	0
558	0
559	0
560	0
561	0
562	0
563	0
564	0
565	0
566	0
567	0
568	0
569	0
570	0
571	0
572	0
573	0
574	0
575	0
576	0
577	0
578	0
579	0
580	0
581	0
582	0
583	0
584	0
585	0
586	0
587	0
588	0
589	0
590	0
591	0
592	0
593	0
594	0
595	0
596	0
597	0
598	0
599	0
600	0
601	0
602	0
603	0
604	0
605	0
606	0
607	0
608	0
609	-1.41019
610	0.492977
611	-1.64592
612	-0.582441
613	-1.03723
614	-1.00961
615	-1.61175
616	0.162394
617	-0.583303
618	0.278
619	-1.3812
620	-0.843759
621	1.94514
622	0.641725
623	0
624	1.39012
625	-0.685986
626	1.5069
627	0.534181
628	-0.785451
629	-0.439982
630	-1.11456
631	-1.19638
632	0.617925
633	-1.4359
634	0
635	0
636	0
637	0
638	0
639	0
640	0
641	0
642	0
643	0
644	0
645	0
646	0
647	0
648	0
649	0
650	0
651	0
652	0
653	0
654	0
655	0
656	0
657	0
658	0
659	0
660	-1.26394
661	3.69748
662	0.199557
663	2.45132
664	1.03558
665	-1.70407
666	-1.65322
667	0.114794
668	1.64087
669	-2.24329
670	0
671	0
672	0
673	0
674	0
675	0
676	0
677	0
678	0
679	0
680	0
681	0
682	0
683	0
684	0
685	0
686	0
687	0
688	0
689	0
690	0
691	0
692	0
693	0
694	0
695	0
696	-2.60117
697	-0.602728
698	0.436936
699	-2.82819
700	2.37495
701	1.54942
702	-2.55369
703	0.413772
704	1.02814
705	1.32844
706	0.428567
707	1.32966
708	0
709	0
710	0
711	0
712	0
713	0
714	0
715	0
716	0
717	0
718	0
719	0
720	0
721	0
722	0
723	0
724	0
725	0
726	0
727	0
728	0
729	-1.58047
730	0.632395
731	-0.46512
732	0.830367
733	-0.048411
734	0.902196
735	-1.01041
736	0.622405
737	1.80739
738	0
739	0
740	0
741	0
742	0
743	1.94467
744	2.68786
745	0.439043
746	0.0484054
747	2.33643
748	-0.193392
749	1.00478
750	0.201929
751	0.846361
752	0
753	0
754	0
755	0
756	0
757	1.41606
758	0
759	0
760	0.168122
761	1.88111
762	0.28416
763	0
764	0
765	0
766	0
767	0
768	0
769	0
770	3.19627
771	0.650406
772	7.61991
773	0.466486
774	4.71617
775	0
776	0
777	0
778	0
779	0
780	0
781	0
782	0
783	0
784	-1.0647
785	0.791421
786	-0.294102
787	1.97158
788	0
789	0
790	0
791	0
792	-3.64349
793	2.0258
794	-0.370059
795	0.135109
796	2.36418
797	1.07463
798	1.25203
799	0.927623
800	-1.47286
801	-0.596743
802	0
803	0
804	0
805	0
806	0
807	0
808	0
809	0
810	0
811	0
812	0
813	0
814	0
815	0
816	0
817	0
818	0
819	0
820	0
821	0
822	0
823	0
824	0
825	0
826	0
827	0
828	0
829	0
830	0
831	0
832	0
833	0
834	0
835	0
836	0
837	0
838	0
839	0
840	0
841	0
842	0
843	0
844	0
845	0
846	0
847	0
848	0
849	0
850	0
851	0
852	0
853	0
854	0
855	0
856	0
857	0
858	0
859	0
860	0
861	0
862	0
863	0
864	0
865	0
866	0
867	0
868	0
869	0
870	0
871	0
872	0
873	0
874	0
875	0
876	0
877	0
878	0
879	0
880	0
881	0
882	0
883	0
884	0
885	0
886	0
887	0
888	0
889	0
890	0
891	0
892	0
893	0
894	0
895	0
896	0
897	0
898	0
899	0
900	0
901	0
902	0
903	0
904	0
905	0
906	0
907	0
908	0
909	0
910	0
911	0
912	0
913	0
914	0
915	0
916	0
917	0
918	0
919	0
920	0

## Sheet: uL2
Alignment index	Score		TwinCons > 4.08	TwinCons < -0.64
1	6.95948		35	28
2	1.09257
3	-0.229676
4	0
5	0
6	0
7	0
8	0
9	0
10	0
11	0
12	0
13	0
14	0
15	0
16	0
17	0
18	0
19	0
20	0
21	0
22	0
23	0
24	0
25	0
26	0
27	0
28	0
29	0
30	0
31	0
32	0
33	0
34	0
35	0
36	0
37	0
38	0
39	0
40	0
41	0
42	0
43	0
44	0
45	0
46	0
47	0
48	0
49	0
50	0
51	0
52	0.448855
53	1.74562
54	0.632334
55	-3.22175
56	-2.6912
57	0.97448
58	0.694569
59	1.01766
60	0.596482
61	2.65061
62	2.39393
63	-2.81174
64	2.36362
65	0
66	0
67	0
68	0
69	0
70	-0.662589
71	1.15551
72	2.3494
73	1.22558
74	0.901926
75	-2.12436
76	0.473835
77	3.5467
78	0
79	0
80	0
81	0
82	0
83	1.19449
84	-0.568296
85	0.582249
86	0.169992
87	0.499047
88	0
89	0
90	0
91	0
92	0
93	0
94	0
95	0
96	0.746743
97	-0.274999
98	0.716519
99	0.213851
100	1.51473
101	0.0558363
102	0.140246
103	0
104	0
105	0
106	0
107	0
108	0
109	0
110	0
111	0.861291
112	-0.188787
113	-1.05053
114	0.768433
115	-0.550905
116	3.24924
117	1.0827
118	4.30418
119	-0.0720343
120	-1.02352
121	4.40462
122	-0.295793
123	3.04482
124	5.34441
125	3.10989
126	0.314297
127	5.84681
128	2.39551
129	3.9827
130	-0.910281
131	3.27515
132	4.29294
133	0.314232
134	2.90041
135	0.026841
136	2.15605
137	0.684398
138	0
139	0
140	0
141	2.61632
142	2.43809
143	1.70084
144	1.06776
145	0
146	0.864541
147	2.33197
148	2.79738
149	1.61351
150	3.29645
151	2.84286
152	0.562844
153	2.10825
154	2.50545
155	-0.296759
156	3.78005
157	4.44225
158	0.98772
159	0.77295
160	3.4964
161	0.0784165
162	-0.570196
163	3.5666
164	0
165	0
166	0
167	0.398976
168	0.75324
169	3.26293
170	0.226429
171	4.19706
172	1.81705
173	0.235352
174	4.14928
175	5.82281
176	0.288586
177	2.99757
178	3.26627
179	3.89451
180	0.538077
181	0.980392
182	5.01034
183	3.25472
184	-0.543191
185	3.35668
186	3.3646
187	-0.547632
188	4.1299
189	1.33868
190	4.91035
191	4.56901
192	7.56118
193	0.247314
194	1.37599
195	1.86785
196	2.54528
197	-2.26822
198	4.18213
199	3.18288
200	2.48511
201	1.33349
202	3.09406
203	5.30808
204	4.33567
205	3.31447
206	3.49508
207	2.69882
208	1.73588
209	3.66199
210	0.637495
211	2.79316
212	3.03659
213	2.35337
214	1.8242
215	1.33685
216	0
217	0
218	0.262786
219	0.551803
220	-1.5757
221	2.3454
222	0.79911
223	2.84717
224	2.06949
225	4.49183
226	0.619965
227	6.17782
228	2.44973
229	1.54814
230	1.8591
231	3.05567
232	-0.118178
233	1.70895
234	0.0647126
235	-0.0311252
236	0.190543
237	6.36572
238	3.52928
239	5.41949
240	5.07038
241	4.077
242	4.18213
243	0.134044
244	3.90756
245	2.00214
246	1.16471
247	-0.0028188
248	-0.416304
249	1.13689
250	0.425637
251	-1.43689
252	0.836137
253	-1.36224
254	2.52597
255	-3.277
256	4.90268
257	4.61249
258	7.08595
259	1.11172
260	1.64615
261	-1.28548
262	1.79752
263	0.819832
264	0
265	0
266	0
267	0
268	0
269	0
270	0
271	-1.04574
272	0.701012
273	-0.582731
274	2.75575
275	1.22677
276	5.08861
277	4.28809
278	5.04801
279	3.42256
280	3.21296
281	8.16889
282	5.40533
283	1.33382
284	4.42388
285	2.83967
286	7.35616
287	3.45945
288	2.73677
289	4.18213
290	3.31938
291	2.66942
292	-0.681171
293	0
294	0
295	0
296	-1.03571
297	1.6956
298	0.735958
299	0.0409999
300	-0.318805
301	-1.34442
302	-1.28217
303	0
304	0
305	0
306	0
307	0
308	0
309	0.226834
310	-0.901126
311	0.0467317
312	3.46368
313	1.13194
314	0
315	-2.81114
316	1.69954
317	0.385294
318	0.433321
319	0.554651
320	-0.241535
321	-1.34369
322	-0.0314858
323	-0.106824
324	0.615129
325	2.3225
326	1.42699
327	0.782109
328	1.03263
329	0.637238
330	0
331	0
332	0
333	0
334	0.339286
335	2.3681
336	-0.67739
337	1.09913
338	-1.80251
339	-2.12396
340	-1.05084
341	-0.670113
342	-0.720674
343	0.621017
344	-0.114413
345	0
346	0
347	0
348	0
349	0
350	0
351	0
352	0
353	0
354	0
355	0
356	0
